# Supplementary material for: Evaluation of a prescription support-tool for chronic management of oral antithrombotic combinations in adults using clinical vignettes: protocol of a randomised controlled trial
Source: PubMed Central journal article supplement — BMJ Open. 2019 Jun 9;9(6):e025544. doi: 10.1136/bmjopen-2018-025544 (PMC6561457; doi:10.1136/bmjopen-2018-025544), 2019-06-09
Supplement: bmjopen-2018-025544.draft_revisions.pdf [file bmjopen-2018-025544.draft_revisions.pdf]

# BMJ Open

BMJ Open is committed to open peer review. As part of this commitment we make the peer review history of every article we publish publicly available.

When an article is published we post the peer reviewers' comments and the authors' responses online. We also post the versions of the paper that were used during peer review. These are the versions that the peer review comments apply to.

The versions of the paper that follow are the versions that were submitted during the peer review process. They are not the versions of record or the final published versions. They should not be cited or distributed as the published version of this manuscript.

BMJ Open is an open access journal and the full, final, typeset and author-corrected version of record of the manuscript is available on our site with no access controls, subscription charges or pay-per-view fees (<http://bmjopen.bmj.com>).

If you have any questions on BMJ Open's open peer review process please email [info.bmjopen@bmj.com](mailto:info.bmjopen@bmj.com)

# BMJ Open

## Evaluation of a prescription support-tool for chronic management of oral antithrombotic combinations in adults: protocol of a randomized controlled trial using clinical vignettes

|                               |                                                                                                                                                                                                                                                                                                                                                                                                                                                                                                                                                                                                                                                                                                                                                                                                                                                                                                                                                                                                                                                                                                                                                                                                                                                                                                                                                                                                                                                                                                                                                                                                                                                                                                                                                                                                                                                                                                                                                                                                 |
|-------------------------------|-------------------------------------------------------------------------------------------------------------------------------------------------------------------------------------------------------------------------------------------------------------------------------------------------------------------------------------------------------------------------------------------------------------------------------------------------------------------------------------------------------------------------------------------------------------------------------------------------------------------------------------------------------------------------------------------------------------------------------------------------------------------------------------------------------------------------------------------------------------------------------------------------------------------------------------------------------------------------------------------------------------------------------------------------------------------------------------------------------------------------------------------------------------------------------------------------------------------------------------------------------------------------------------------------------------------------------------------------------------------------------------------------------------------------------------------------------------------------------------------------------------------------------------------------------------------------------------------------------------------------------------------------------------------------------------------------------------------------------------------------------------------------------------------------------------------------------------------------------------------------------------------------------------------------------------------------------------------------------------------------|
| Journal:                      | <i>BMJ Open</i>                                                                                                                                                                                                                                                                                                                                                                                                                                                                                                                                                                                                                                                                                                                                                                                                                                                                                                                                                                                                                                                                                                                                                                                                                                                                                                                                                                                                                                                                                                                                                                                                                                                                                                                                                                                                                                                                                                                                                                                 |
| Manuscript ID                 | bmjopen-2018-025544                                                                                                                                                                                                                                                                                                                                                                                                                                                                                                                                                                                                                                                                                                                                                                                                                                                                                                                                                                                                                                                                                                                                                                                                                                                                                                                                                                                                                                                                                                                                                                                                                                                                                                                                                                                                                                                                                                                                                                             |
| Article Type:                 | Protocol                                                                                                                                                                                                                                                                                                                                                                                                                                                                                                                                                                                                                                                                                                                                                                                                                                                                                                                                                                                                                                                                                                                                                                                                                                                                                                                                                                                                                                                                                                                                                                                                                                                                                                                                                                                                                                                                                                                                                                                        |
| Date Submitted by the Author: | 20-Jul-2018                                                                                                                                                                                                                                                                                                                                                                                                                                                                                                                                                                                                                                                                                                                                                                                                                                                                                                                                                                                                                                                                                                                                                                                                                                                                                                                                                                                                                                                                                                                                                                                                                                                                                                                                                                                                                                                                                                                                                                                     |
| Complete List of Authors:     | <p>ZERAH, Lorene; Sorbonne Université, Faculté de médecine Sorbonne Université, INSERM, UMR 1123; AP-HP, Hôpital Pitié-Salpêtrière, Département Biostatistique Santé Publique et Information Médicale, Centre de Pharmacoépidémiologie (Cephepi)</p> <p>Bonnet-Zamponi, Dominique; AP-HP, Hôpital Pitié-Salpêtrière, Département Biostatistique Santé Publique et Information Médicale, Centre de Pharmacoépidémiologie (Cephepi); Observatoire du Médicament des Dispositifs Médicaux et de l'Innovation Thérapeutique Ile de France, OMEDIT</p> <p>Frappé, Paul; Institut de recherche en médecine générale; University of Saint-Etienne, Department of General Practice</p> <p>Hauguel-Moreau, Marie; Assistance Publique - Hopitaux de Paris, Département de cardiologie, Hôpitaux universitaires Pitié-Salpêtrière-Charles Foix</p> <p>De Rycke, Yann; AP-HP, Hôpital Pitié-Salpêtrière, Département Biostatistique Santé Publique et Information Médicale, Centre de Pharmacoépidémiologie (Cephepi)</p> <p>Magnier, Anne-Marie; Assistance Publique - Hopitaux de Paris, Département de médecine générale, Hôpitaux universitaires Pitié-Salpêtrière-Charles Foix</p> <p>Pautas, Eric; Assistance Publique - Hopitaux de Paris, Département de gériatrie, Hôpitaux universitaires Pitié-Salpêtrière-Charles Foix</p> <p>Charles, Pierre; Institut Mutualiste Montsouris, Médecine Interne</p> <p>Collet, Jean-philippe; Assistance Publique - Hopitaux de Paris, Département de cardiologie, Hôpitaux universitaires Pitié-Salpêtrière-Charles Foix</p> <p>Dechartres, Agnes; AP-HP, Hôpital Pitié-Salpêtrière, Département Biostatistique Santé Publique et Information Médicale, Centre de Pharmacoépidémiologie (Cephepi)</p> <p>Tubach, Florence; Sorbonne Université, Faculté de médecine Sorbonne Université, INSERM, UMR 1123; AP-HP, Hôpital Pitié-Salpêtrière, Département Biostatistique Santé Publique et Information Médicale, Centre de Pharmacoépidémiologie (Cephepi)</p> |
| Keywords:                     | prescription support-tool, clinical vignettes, antithrombotic combination                                                                                                                                                                                                                                                                                                                                                                                                                                                                                                                                                                                                                                                                                                                                                                                                                                                                                                                                                                                                                                                                                                                                                                                                                                                                                                                                                                                                                                                                                                                                                                                                                                                                                                                                                                                                                                                                                                                       |

1  
2  
3  
4  
5  
6  
7  
8  
9  
10  
11  
12  
13  
14  
15  
16  
17  
18  
19  
20  
21  
22  
23  
24  
25  
26  
27  
28  
29  
30  
31  
32  
33  
34  
35  
36  
37  
38  
39  
40  
41  
42  
43  
44  
45  
46  
47  
48  
49  
50  
51  
52  
53  
54  
55  
56  
57  
58  
59  
60

SCHOLARONE™  
Manuscripts

For peer review only

1 **Evaluation of a prescription support-tool for chronic management of oral**  
2 **antithrombotic combinations in adults: protocol of a randomized controlled trial using**  
3 **clinical vignettes**

4

5 Zerah L<sup>1</sup>, Bonnet-Zamponi D<sup>1,2</sup>, Frappé P<sup>3,4</sup>, Hauguel-Moreau M<sup>5</sup>, De Rycke Y<sup>1</sup>, Magnier  
6 AM<sup>6</sup>, Pautas E<sup>7</sup>, Charles P<sup>8</sup>, Collet JP<sup>5</sup>, Dechartres A<sup>1</sup>, Tubach F<sup>1</sup>

- 7 1. Sorbonne Université, Faculté de médecine Sorbonne Université, AP-HP, Hôpital Pitié-  
8 Salpêtrière, Département Biostatistique Santé Publique et Information Médicale, Centre  
9 de Pharmacoépidémiologie (Cephepi), INSERM, UMR 1123, CIC-P 1421, F-75013 Paris,  
10 France  
11 2. Observatoire du Médicament des Dispositifs Médicaux et de l'Innovation Thérapeutique  
12 Ile de France (OMEDIT), Paris, France.  
13 3. Institut de recherche en médecine générale, Paris, France  
14 4. Department of General Practice, University of Saint-Etienne, Saint-Etienne, France  
15 5. Sorbonne Université, Faculté de médecine Sorbonne Université, AP-HP, Département de  
16 cardiologie, Hôpitaux universitaires Pitié-Salpêtrière-Charles Foix, 75013 Paris, France  
17 6. Sorbonne Université, Faculté de médecine Sorbonne Université, AP-HP, Département de  
18 médecine générale, Hôpitaux universitaires Pitié-Salpêtrière-Charles Foix, 75013 Paris,  
19 France  
20 7. Sorbonne Université, Faculté de médecine Sorbonne Université, AP-HP, Département de  
21 gériatrie, Hôpitaux universitaires Pitié-Salpêtrière-Charles Foix, 75013 Paris, France  
22 8. Département de médecine interne, Institut Mutualiste Montsouris, 75014 Paris, France

23  
24 \* **Corresponding author: Dr Lorene Zerah**

25 Correspondence to: [lorene.zerah@inserm.fr](mailto:lorene.zerah@inserm.fr)

26 Address: Département Biostatistique Santé Publique et Information Médicale, Centre de  
27 Pharmacoépidémiologie (Cephepi), Hôpital Pitié-Salpêtrière 47 – 83 boulevard de l'hôpital,  
28 75013, Paris, France

29 Tel: +33 1 42 16 03 47

1  
2  
3 30 **ABSTRACT**

4 31 **Introduction:** Oral antithrombotic (AT) drugs are widely implicated in serious and  
5  
6 32 preventable bleeding events, which justifies the implementation of risk minimization actions.  
7  
8 33 Avoiding inappropriate oral AT combinations is a major concern, particularly for patients  
9  
10 34 with multiple chronic conditions. The first step is to provide fast and easy access to the latest  
11  
12 35 recommendations. From a systematic review of international guidelines (2012-2017), we  
13  
14 36 developed a prescription support-tool synthesizing national and international guidelines on  
15  
16 37 chronic management ( $\geq 1$  month) of oral AT agents without considering in-hospital  
17  
18 38 management and bridging therapy. Our main objective in this study is to evaluate the  
19  
20 39 accuracy of this tool by measuring the appropriateness of oral AT prescriptions according to  
21  
22 40 the most recent guidelines.  
23  
24

25  
26 41

27  
28 42 **Methods and analysis:** In this web-based randomized controlled trial, participating French  
29  
30 43 general practitioners and cardiologists in the outpatient setting will be randomized by use or  
31  
32 44 not of the prescription support-tool. They will be asked to provide the number of drugs, drug  
33  
34 45 class, duration and dosage of ATs, within a time window of 10 minutes, for 3 different  
35  
36 46 clinical situations presented as clinical vignettes (multiple-choice questions). The scientific  
37  
38 47 committee has created and validated 30 clinical vignettes illustrating outpatient clinical  
39  
40 48 situations for which the use of oral ATs (single, dual or triple therapy) is recommended or not  
41  
42 49 according to the guidelines. All data will be treated anonymously.  
43  
44

45  
46 50

47  
48 51 **Ethics and dissemination:** If the prescription support-tool is associated with more  
49  
50 52 appropriate prescription of AT combinations, its dissemination to further evaluate outcome  
51  
52 53 data including haemorrhage, ischemic events, and death will be considered.  
53  
54  
55  
56  
57  
58  
59

1  
2  
3 54 **Article summary: strengths and limitations of this study**  
4

5 55 • Strengths:

6  
7 56 ○ Importance of the study: this study will evaluate a new prescription support-tool  
8  
9 57 for oral antithrombotic (AT) combination. If the intervention is found to be  
10  
11 58 effective, it has the potential to avoid a lot of adverse drugs events.

12  
13 59 ○ Robust intervention development: first, the prescription support-tool was  
14  
15 60 developed from a systematic review of international guidelines (2012-2017).  
16  
17 61 Second, a scientific committee and an expert committee have validated all clinical  
18  
19 62 vignettes that we will use to evaluate the tool.

20  
21 63 ○ This is a multicentric, randomized study, with several medical specialties  
22  
23 64 represented.

24  
25  
26 65 • Potential study limitations:

27  
28 66 ○ Bias toward selected physicians who may not be representative of general  
29  
30 67 practitioners or cardiologists because they volunteered.

31  
32 68 ○ Access to the prescription support-tool in the control group cannot be avoided.

33  
34 69 ○ Generalisability: this study will be undertaken in France. Although this may limit  
35  
36 70 generalisability, the prescription support-tool was developed from a systematic  
37  
38 71 review of international guidelines from all over the world.  
39  
40  
41  
42  
43  
44  
45  
46  
47  
48  
49  
50  
51  
52  
53  
54  
55  
56  
57  
58  
59  
60

## 72 INTRODUCTION

### 73 Background

74 Because of multimorbidity (commonly defined as the presence of 2 or more chronic medical  
75 conditions in an individual) and medical progress, combinations of oral antithrombotic (AT)  
76 drugs, which include antiplatelet (AP) and anticoagulant (AC) therapies, are increasingly  
77 being prescribed.[1] ATs are also the most frequent drug class implicated in preventable  
78 serious and fatal adverse drug events (particularly bleeding events),[2,3] and their  
79 combination (dual or triple AT therapy) greatly increases this risk. For example, Hansen et al.  
80 reported a 3.1-fold higher risk of fatal and non-fatal bleeding with dual warfarin and  
81 clopidogrel therapy and a 3.7-fold higher risk with triple therapy (warfarin, aspirin and  
82 clopidogrel) than warfarin monotherapy in patients with non-valvular atrial fibrillation (NV-  
83 AF).[4] Data on inappropriate AT combination prescriptions are limited to a Canadian  
84 primary care cohort[5]: 15% of patients prescribed ATs had inappropriate dual or triple oral  
85 AT therapy (in terms of the type of drugs combined only), which suggests important room for  
86 improvement of AT combination prescriptions. Thus, developing efficient risk minimization  
87 actions by avoiding inappropriate combinations of ATs is necessary to improve their  
88 benefit/risk ratio.

89 In this perspective, from a systematic review of international guidelines (2012-2017), we  
90 developed a prescription support-tool [article under review elsewhere] synthesizing, on a  
91 double-sided page, international guidelines on chronic management (at least 1 month) of oral  
92 AT combinations (drugs, dosages and duration) in adults, without considering in-hospital  
93 management and bridging therapy. This prescription support-tool aimed at giving physicians  
94 quick access to the recommendation that fit most of their patient's clinical situation.

### 95 Study objectives and trial design

1  
2  
3 96 Our main hypothesis is that the prescription support-tool increases the rate of “right  
4 97 prescription of oral AT combinations” as defined according to the most recent guidelines.

5  
6  
7 98 The primary objective will be to evaluate the impact of this tool on the global appropriateness  
8  
9 99 of oral AT prescriptions according to the most recent guidelines (in terms of number of drugs,  
10  
11 100 drug class, duration and dosage: composite score).

12  
13 101 Secondary objectives will be to evaluate the impact of this tool on the appropriateness of oral  
14  
15 102 AT prescriptions according to the most recent guidelines in terms of the (1) number of drugs,  
16  
17 103 (2) drug class, (3) dosage, (4) duration, (5) and combinations that should never be prescribed.

18  
19  
20 104 We will also evaluate whether the impact of this tool differs by medical specialty of  
21  
22 105 physicians responding. Finally, we will evaluate the degree of certainty physicians have about  
23  
24 106 their AT prescriptions in line with the guidelines. In the experimental group, we will assess  
25  
26 107 the use of the prescription support-tool to answer questions about clinical vignettes and the  
27  
28 108 degree of the tool’s perceived usefulness by physicians.

29  
30  
31 109 This trial is designed as a web-based, open randomized controlled trial with two parallel  
32  
33 110 groups.

34  
35 111

## 36 37 112 **METHODS AND ANALYSIS**

### 38 39 113 **Study design**

40  
41 114 A web-based, open randomized controlled trial involving clinical vignettes will be performed  
42  
43 115 in France. Clinical vignettes illustrating plausible situations will be used because they reflect  
44  
45 116 clinical practice.[6,7] Such an approach has been found valid in measuring quality of  
46  
47 117 care.[8,9] The randomization unit will be the physician and the unit of analysis the clinical  
48  
49 118 vignette. Our study will involve a scientific committee and an expert committee. The  
50  
51 119 scientific committee consists of a cardiologist, 2 internist-geriatricians, a general practitioner  
52  
53 120 and 2 epidemiologists. The scientific committee designed the study protocol, created and  
54  
55  
56  
57  
58  
59  
60



1  
2  
3 [121](#) validated the clinical vignettes and will be responsible for data analysis and writing the  
4  
5 [122](#) manuscript. The expert committee consists of a cardiologist, a geriatrician, an internist and a  
6  
7 [123](#) general practitioner (medical specialties that often deal with patients needing chronic oral AT  
8  
9 [124](#) prescriptions). The expert committee had to review all clinical vignettes with the prescription  
10  
11 [125](#) support-tool (external validation) to confirm their agreement with clinical practice and their  
12  
13 [126](#) readability and to estimate the time needed to complete 3 clinical vignettes.

### [127](#) **Development of clinical vignettes**

14  
15  
16  
17  
18 [128](#) Two physicians (1 cardiologist and 1 internist-geriatrician) created 30 clinical vignettes  
19  
20 [129](#) covering most outpatient clinical situations for which the long-term use of ATs (single, dual  
21  
22 [130](#) or triple therapy) is recommended or not. An example of a clinical vignette is presented in

### [131](#) **Appendix 1.**

### [132](#) **Prescription support tool**

23  
24  
25  
26  
27  
28 [133](#) This tool is derived from a systematic review of guidelines (N = 63) dealing with the use of  
29  
30 [134](#) oral ATs for NV-AF, coronary artery disease, ischemic stroke, valvular heart disease,  
31  
32 [135](#) peripheral artery disease and venous thromboembolism. These pathologies were selected  
33  
34 [136](#) because most prescriptions of ATs are related to neuro-cardiovascular diseases and because  
35  
36 [137](#) we would provide a synthesis relevant for clinicians in charge of the follow-up of patients  
37  
38 [138](#) with oral AT combinations, including patients with more than one indication for AT.  
39  
40 [139](#) Indication, type of drugs combined, dosage and duration of prescription are synthesized in  
41  
42 [140](#) this easy-to-use tool, which fits on one double-sided page and can be stored in a physician's  
43  
44 [141](#) pocket. Our tool also specifies the type of ATs that should never be combined (combinations  
45  
46 [142](#) of oral anticoagulant (OAC), combinations of P2Y12 inhibitors or the combination of one  
47  
48 [143](#) OAC with one potent P2Y12 inhibitor, namely ticagrelor or prasugrel), the clinical situations  
49  
50 [144](#) in which oral AT combinations are never indicated and the contraindications of ATs. The full  
51  
52 [145](#) description of this tool is under review elsewhere.

1  
2  
3 **146 Study setting and eligibility criteria**

4  
5 **147** This study will be conducted among French practicing physicians who are involved in  
6  
7 **148** outpatient settings, including general practitioners and cardiologists. Physicians with an  
8  
9 **149** exclusive hospital practice will not be considered. Physicians will be identified and contacted  
10  
11 **150** for participation directly by email via physicians' associations. Each physician willing to  
12  
13 **151** participate will complete, after providing their consent to participate, a questionnaire via a  
14  
15 **152** web-based survey, including questions on age, sex, medical specialty, and years of medical  
16  
17 **153** practice. Physicians will be asked about the approximate proportion of patients with oral AT  
18  
19 **154** combinations in their practice ( $\leq 5\%$ , 6–10%, 11–20% or  $\geq 21\%$ ), whether they feel  
20  
21 **155** comfortable or not with management of oral AT prescriptions (totally, partially, rarely, never)  
22  
23 **156** and whether they know where to find the most recent guidelines on oral AT prescriptions.

24  
25  
26 **157 Intervention**

27  
28 **158** Selected physicians will be randomized to 2 groups by use or not of the prescription support-  
29  
30 **159** tool. In the control group, no tool will be provided. In the experimental group, the tool will be  
31  
32 **160** provided with an explanatory guide. All selected physicians will receive 3 different clinical  
33  
34 **161** vignettes, each corresponding to a specific situation for which the physician will have to  
35  
36 **162** indicate the “right prescription” of ATs by answering a multiple-choice question, with the  
37  
38 **163** number, type, duration and dosage of AT provided. They will have to state their degree of  
39  
40 **164** certainty with the prescription. The total completion time will be approximately 10 minutes  
41  
42 **165** and physicians will be able to stop and continue at any time. Physicians from the control  
43  
44 **166** group will receive the prescription support-tool once they have completed their answers for  
45  
46 **167** the 3 clinical vignettes. To maximize the participation rate, after being selected, physicians  
47  
48 **168** will be sent reminders every 20 days.

49  
50  
51  
52 **169 Outcomes**

1  
2  
3 170 The primary outcome measure is the rate of the “right prescription of oral ATs” as defined  
4  
5 171 according to the guidelines in terms of number, class, duration and dosage between the two  
6  
7 172 groups.

8  
9 173 Secondary outcomes are (1) the primary outcome by physicians’ specialty and (2) the  
10  
11 174 difference between the control and intervention groups in the degree of confidence physicians  
12  
13 175 have in their AT prescriptions in line with the guidelines. The prescription support-tool,  
14  
15 176 synthesizing national and international guidelines on chronic management of oral AT  
16  
17 177 prescriptions, will be the reference.

### 18 19 20 178 **Randomization**

21  
22 179 Concealment and balance between trial arms will be achieved by using a computer-generated  
23  
24 180 randomization scheme, stratified by whether the physician is a general practitioner or a  
25  
26 181 cardiologist, in blocks of 4. The clinical vignettes assignment will be randomized in blocks of  
27  
28 182 30. Physicians allocated to receive the prescription support-tool will be asked to comment on  
29  
30 183 the overall usefulness of the tool.

### 31 32 33 184 **Data collection methods and data management**

34  
35 185 The dedicated website was designed by an engineer. Data from physicians’ answers will be  
36  
37 186 automatically integrated in a database for statistical analysis. The data will be completely  
38  
39 187 anonymous. In particular, neither the physician’s name nor email address will be collected.  
40  
41 188 There is no planned follow-up in this trial.

### 42 43 44 189 **Patient and Public Involvement**

45  
46 190 Patients and / or the public have not been involved in the development of the research or in  
47  
48 191 the study design because the randomization unit will be the physicians and the unit of analysis  
49  
50 192 the clinical vignette. The main objective of this study is to evaluate a tool for physicians to  
51  
52 193 help them with their prescriptions of ATs.

### 53 54 55 194 **Sample size and statistical considerations**

1  
2  
3 195 In considering that 85% of AT prescriptions is appropriate[5] in the control group and hoping  
4  
5 196 to demonstrate an increase in this proportion up to 90% with the support-tool as well as that  
6  
7 197 each physician will complete 3 clinical vignettes, we will need to include (for a power of 80%  
8  
9 198 and an alpha risk of 5%) a minimum of 229 physicians per group. To obtain a multiple of 10  
10  
11 199 for the randomization (because each physician will complete 3 vignettes), we hope to include  
12  
13 200 at least 230 physicians per group. If more physicians are willing to participate, all collected  
14  
15 201 data will be considered. A generalized mixed model with a clinical-vignette effect and a  
16  
17 202 physician-effect nested in the arm of the study will be used. All analyses will involve use of R  
18  
19 203 v3.4.0 ([www.cran.r-project.org](http://www.cran.r-project.org)).  
20  
21  
22  
23

204

## 205 **ETHICS AND DISSEMINATION**

26 206 Results of this study will be disseminated in a paper submitted to a peer-reviewed journal and  
27  
28 207 presentations at relevant conferences. If the use of the prescription support-tool is associated  
29  
30 208 with an increased rate of appropriate prescribing of oral AT combinations, we will further  
31  
32 209 consider wide dissemination of the support-tool among physicians and evaluate the impact of  
33  
34 210 this diffusion on patients' clinical outcomes (bleeding events, ischemic events, death).  
35  
36  
37  
38  
39  
40  
41  
42  
43  
44  
45  
46  
47  
48  
49  
50  
51  
52  
53  
54  
55  
56  
57  
58  
59  
60

1  
2  
3 211 **ACKNOWLEDGMENTS**

4 212 **Authors' contributions:** LZ, DBZ, AD and FT designed the study. LZ and MH designed the  
5  
6  
7 213 clinical vignettes and all authors reviewed and validated them. LZ drafted and prepared the  
8  
9 214 manuscript for publication. All authors re-read and corrected the manuscript. All authors  
10  
11 215 approved the final manuscript.

12  
13 216 **Funding statement:** This work was supported by Sorbonne Université (PhD grant).

14  
15 217 **Competing interests:** None.

16  
17 218 **English editing** by Laura Smales from BioMedEditing.

18  
19 219 **We thank Sebastien Zerah who designed the dedicated website.**

20  
21 220 **Ethics approval:** The ethics evaluation committee of Inserm, the *Institutional Review Board*  
22  
23 221 (IRB00003888) has reviewed and approved our research project on 06/12/2018: number 18-  
24  
25 222 492.

26  
27 223 **Trial registration:** submitted to ClinicalTrials.gov (Protocol version 06/21/2018).

28  
29 224 **The study start date is summer 2018.**  
30  
31  
32  
33  
34  
35  
36  
37  
38  
39  
40  
41  
42  
43  
44  
45  
46  
47  
48  
49  
50  
51  
52  
53  
54  
55  
56  
57  
58  
59  
60

1  
2  
3 225 **REFERENCES**

- 4  
5 226 1. Mega JL, Simon T. Pharmacology of antithrombotic drugs: an assessment of oral  
6 227 antiplatelet and anticoagulant treatments. *Lancet*. 2015;386(9990):281–91.  
7 228 doi:10.1016/S0140-6736(15)60243-4.
- 8  
9 229 2. Patel NS, Patel TK, Patel PB, Naik VN, Tripathi CB. Hospitalizations due to  
10 230 preventable adverse reactions—a systematic review. *Eur J Clin Pharmacol*.  
11 231 2017;73(4):385–98. doi:10.1007/s00228-016-2170-6.
- 12  
13 232 3. Wester K, Jönsson AK, Spigset O, Druid H, Hägg S. Incidence of fatal adverse drug  
14 233 reactions: a population based study. *Brit J Clin Pharmacol*. 2008;65(4):573–9.  
15 234 doi:10.1111/j.1365-2125.2007.03064.x.
- 16  
17 235 4. Hansen ML, Sørensen R, Clausen MT, Fog-Petersen ML, Raunsø J, Gadsbøll N, et al.  
18 236 Risk of bleeding with single, dual, or triple therapy with warfarin, aspirin, and  
19 237 clopidogrel in patients with atrial fibrillation. *Arch Intern Med*. 2010;170(16):1433–41.  
20 238 doi:10.1001/archinternmed.2010.271.
- 21  
22 239 5. Hamilton K, Davis C, Falk J, Singer A, Bugden S. Assessing prescribing of NSAIDs,  
23 240 antiplatelets, and anticoagulants in Canadian family medicine using chart review. *Int J*  
24 241 *Clin Pharm*. 2016;38(5):1094–1102. doi:10.1007/s11096-016-0335-0.
- 25  
26 242 6. Engel J, van der Wulp I, Poldervaart JM, Reitsma JB, de Bruijne MC, Wagner C.  
27 243 Clinical decision-making of cardiologists regarding admission and treatment of patients  
28 244 with suspected unstable angina or non-ST-elevation myocardial infarction: protocol of  
29 245 a clinical vignette study. *BMJ Open*. 2015;5(4):e006441.
- 30  
31 246 7. Bachmann LM, Mühleisen A, Bock A, Riet ter G, Held U, Kessels AG. Vignette  
32 247 studies of medical choice and judgement to study caregivers' medical decision  
33 248 behaviour: systematic review. *BMC Med Res Methodol*. 2008;8:50.
- 34  
35 249 8. Peabody JW, Luck J, Glassman P, Dresselhaus TR, Lee M. Comparison of vignettes,  
36 250 standardized patients, and chart abstraction: a prospective validation study of 3  
37 251 methods for measuring quality. *JAMA*. 2000;283(13):1715-1722.
- 38  
39 252 9. Peabody JW, Luck J, Glassman P, et al. Measuring the quality of physician practice by  
40 253 using clinical vignettes: a prospective validation study. *Ann Intern Med*.  
41 254 2004;141(10):771-780.

42  
43  
44  
45 255

### **Appendix 1: Example of a clinical vignette**

At your medical consultation, you meet Mr R, 86 years old (weight: 81 kg, body mass index: 24 kg/m<sup>2</sup>). Mr R is a widower, a smoker (10 cigarettes a day, 50 pack-years) and is autonomous in all daily activities. He has no personal medical history. His last biological test did not find any abnormalities (serum creatinine value: 77 µM/L, creatinine clearance using the Cockcroft formula: 70 ml/min).

He comes to see you in consultation because for more than 1 week, he has had palpitations with exercise. You perform electrocardiogram (ECG) in your office and you diagnose non-valvular atrial fibrillation. The biological assessment is without particularity (in particular blood ionography and thyroid-stimulating hormone). Cardiac ultrasonography revealed a dilated left atrium with no valve abnormality.

#### **1) How many antithrombotic treatments will you prescribe during this consultation?**

- 0
- 1
- 2
- 3

#### **2) If you answered 0 to question 1, go to question 5. If not, which molecule(s) of antithrombotic(s) will you prescribe during this consultation?**

- Warfarin
- Rivaroxaban
- Apixaban
- Aspirin
- Clopidogrel

#### **3) Which dosage will you prescribe this(these) molecule(s)? (For each molecule checked on the previous question, it will appear:)**

- Warfarin:
  - INR (International Normalized Ratio): 2-3
  - INR (International Normalized Ratio): 2.5-3.5
- Rivaroxaban
  - 15 mg per day
  - 20 mg per day
- Apixaban
  - 2.5 mg twice a day
  - 5 mg twice a day
- Aspirin
  - 75-100 mg per day
  - 300 mg per day
- Clopidogrel
  - 75 mg per day
  - 300 mg per day

1  
2  
3 **4) How long does the antithrombotic treatment prescribed in the previous question need**  
4 **to be continued?**

- 5
- 6 • 1 month
  - 7 • 6 months
  - 8 • 12 months
  - 9 • For life
- 10

11 **5) On a scale of 0 to 10, what is your degree of confidence in the adequacy of your**  
12 **prescription in relation to the guidelines?**

13  
14  
15  
16 **For the experimental group, after completion of the 3 clinical vignettes:**

17  
18  
19 **Regarding the prescription support tool, please note the following items from 0 (strongly**  
20 **disagree) to 10 (strongly agree):**

- 21
- 22 • The prescription support-tool helped me answer to the clinical vignettes:../10
  - 23 • The prescription support-tool has modified the answers that I spontaneously made to
  - 24 clinical vignettes:../10
  - 25 • The prescription support-tool is clear:../10
  - 26 • The prescription support-tool is operational:../10
  - 27 • The prescription support-tool is useful for practice:../10
  - 28 • I would be ready to use this prescription support-tool:../10
  - 29 • I would recommend the use of this prescription support-tool:../10
- 30  
31  
32

33 **Notes on the tool: What are the points of the prescription support-tool that could be**  
34 **improved: useless information, missing information, presentation, etc:**

35  
36  
37  
38  
39  
40  
41  
42  
43  
44  
45  
46  
47  
48  
49  
50  
51  
52  
53  
54  
55  
56  
57  
58  
59  
60



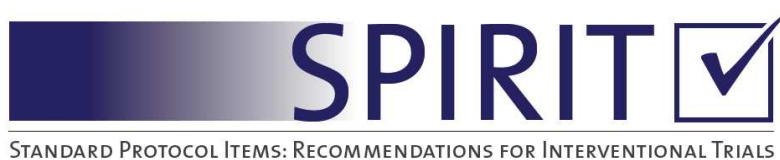

SPIRIT 2013 Checklist: Recommended items to address in a clinical trial protocol and related documents\*

| Section/item                      | Item No | Description                                                                                                                                                                                                                                                                              |
|-----------------------------------|---------|------------------------------------------------------------------------------------------------------------------------------------------------------------------------------------------------------------------------------------------------------------------------------------------|
| <b>Administrative information</b> |         |                                                                                                                                                                                                                                                                                          |
| Title                             | 1       | Descriptive title identifying the study design, population, interventions, and, if applicable, trial acronym<br>→ <b>Page 1</b>                                                                                                                                                          |
| Trial registration                | 2a      | Trial identifier and registry name. If not yet registered, name of intended registry<br>→ <b>line 223, page 10</b>                                                                                                                                                                       |
|                                   | 2b      | All items from the World Health Organization Trial Registration Data Set                                                                                                                                                                                                                 |
| Protocol version                  | 3       | Date and version identifier<br>→ <b>line 223, page 10</b>                                                                                                                                                                                                                                |
| Funding                           | 4       | Sources and types of financial, material, and other support<br>→ <b>line 216, page 10</b>                                                                                                                                                                                                |
| Roles and responsibilities        | 5a      | Names, affiliations, and roles of protocol contributors<br>→ <b>Title page and lines 212- 215 page 10</b>                                                                                                                                                                                |
|                                   | 5b      | Name and contact information for the trial sponsor                                                                                                                                                                                                                                       |
|                                   | 5c      | Role of study sponsor and funders, if any, in study design; collection, management, analysis, and interpretation of data; writing of the report; and the decision to submit the report for publication, including whether they will have ultimate authority over any of these activities |
|                                   | 5d      | Composition, roles, and responsibilities of the coordinating centre, steering committee, endpoint adjudication committee, data management team, and other individuals or groups overseeing the trial, if applicable (see Item 21a for data monitoring committee)                         |
| <b>Introduction</b>               |         |                                                                                                                                                                                                                                                                                          |
| Background and rationale          | 6a      | Description of research question and justification for undertaking the trial, including summary of relevant studies (published and unpublished) examining benefits and harms for each intervention<br>→ <b>Lines 74 – 94, page 4</b>                                                     |
|                                   | 6b      | Explanation for choice of comparators                                                                                                                                                                                                                                                    |

|    |                                                           |     |                                                                                                                                                                                                                                                                                                                                                                                                                                   |
|----|-----------------------------------------------------------|-----|-----------------------------------------------------------------------------------------------------------------------------------------------------------------------------------------------------------------------------------------------------------------------------------------------------------------------------------------------------------------------------------------------------------------------------------|
| 1  | Objectives                                                | 7   | Specific objectives or hypotheses<br>→ <b>Lines 96 – 108, page 5</b>                                                                                                                                                                                                                                                                                                                                                              |
| 2  |                                                           |     |                                                                                                                                                                                                                                                                                                                                                                                                                                   |
| 3  |                                                           |     |                                                                                                                                                                                                                                                                                                                                                                                                                                   |
| 4  | Trial design                                              | 8   | Description of trial design including type of trial (eg, parallel group,<br>crossover, factorial, single group), allocation ratio, and framework (eg,<br>superiority, equivalence, noninferiority, exploratory)<br>→ <b>Lines 109 - 110, page 5</b>                                                                                                                                                                               |
| 5  |                                                           |     |                                                                                                                                                                                                                                                                                                                                                                                                                                   |
| 6  |                                                           |     |                                                                                                                                                                                                                                                                                                                                                                                                                                   |
| 7  |                                                           |     |                                                                                                                                                                                                                                                                                                                                                                                                                                   |
| 8  |                                                           |     |                                                                                                                                                                                                                                                                                                                                                                                                                                   |
| 9  |                                                           |     |                                                                                                                                                                                                                                                                                                                                                                                                                                   |
| 10 | <b>Methods: Participants, interventions, and outcomes</b> |     |                                                                                                                                                                                                                                                                                                                                                                                                                                   |
| 11 |                                                           |     |                                                                                                                                                                                                                                                                                                                                                                                                                                   |
| 12 | Study setting                                             | 9   | Description of study settings (eg, community clinic, academic hospital)<br>and list of countries where data will be collected. Reference to where<br>list of study sites can be obtained<br>→ <b>Lines 114 - 115 page 5 and Lines 147 – 148 page 7</b>                                                                                                                                                                            |
| 13 |                                                           |     |                                                                                                                                                                                                                                                                                                                                                                                                                                   |
| 14 |                                                           |     |                                                                                                                                                                                                                                                                                                                                                                                                                                   |
| 15 |                                                           |     |                                                                                                                                                                                                                                                                                                                                                                                                                                   |
| 16 |                                                           |     |                                                                                                                                                                                                                                                                                                                                                                                                                                   |
| 17 | Eligibility criteria                                      | 10  | Inclusion and exclusion criteria for participants. If applicable, eligibility<br>criteria for study centres and individuals who will perform the<br>interventions (eg, surgeons, psychotherapists)<br>→ <b>Lines 147 – 149 page 7</b>                                                                                                                                                                                             |
| 18 |                                                           |     |                                                                                                                                                                                                                                                                                                                                                                                                                                   |
| 19 |                                                           |     |                                                                                                                                                                                                                                                                                                                                                                                                                                   |
| 20 |                                                           |     |                                                                                                                                                                                                                                                                                                                                                                                                                                   |
| 21 |                                                           |     |                                                                                                                                                                                                                                                                                                                                                                                                                                   |
| 22 |                                                           |     |                                                                                                                                                                                                                                                                                                                                                                                                                                   |
| 23 | Interventions                                             | 11a | Interventions for each group with sufficient detail to allow replication,<br>including how and when they will be administered<br>→ <b>Lines 158 – 167, page 7</b>                                                                                                                                                                                                                                                                 |
| 24 |                                                           |     |                                                                                                                                                                                                                                                                                                                                                                                                                                   |
| 25 |                                                           |     |                                                                                                                                                                                                                                                                                                                                                                                                                                   |
| 26 |                                                           |     |                                                                                                                                                                                                                                                                                                                                                                                                                                   |
| 27 |                                                           | 11b | Criteria for discontinuing or modifying allocated interventions for a<br>given trial participant (eg, drug dose change in response to harms,<br>participant request, or improving/worsening disease)                                                                                                                                                                                                                              |
| 28 |                                                           |     |                                                                                                                                                                                                                                                                                                                                                                                                                                   |
| 29 |                                                           |     |                                                                                                                                                                                                                                                                                                                                                                                                                                   |
| 30 |                                                           |     |                                                                                                                                                                                                                                                                                                                                                                                                                                   |
| 31 |                                                           | 11c | Strategies to improve adherence to intervention protocols, and any<br>procedures for monitoring adherence (eg, drug tablet return,<br>laboratory tests)<br>→ <b>Lines 167 – 168, page 7</b>                                                                                                                                                                                                                                       |
| 32 |                                                           |     |                                                                                                                                                                                                                                                                                                                                                                                                                                   |
| 33 |                                                           |     |                                                                                                                                                                                                                                                                                                                                                                                                                                   |
| 34 |                                                           |     |                                                                                                                                                                                                                                                                                                                                                                                                                                   |
| 35 |                                                           |     |                                                                                                                                                                                                                                                                                                                                                                                                                                   |
| 36 |                                                           | 11d | Relevant concomitant care and interventions that are permitted or<br>prohibited during the trial                                                                                                                                                                                                                                                                                                                                  |
| 37 |                                                           |     |                                                                                                                                                                                                                                                                                                                                                                                                                                   |
| 38 |                                                           |     |                                                                                                                                                                                                                                                                                                                                                                                                                                   |
| 39 | Outcomes                                                  | 12  | Primary, secondary, and other outcomes, including the specific<br>measurement variable (eg, systolic blood pressure), analysis metric<br>(eg, change from baseline, final value, time to event), method of<br>aggregation (eg, median, proportion), and time point for each<br>outcome. Explanation of the clinical relevance of chosen efficacy and<br>harm outcomes is strongly recommended<br>→ <b>Lines 170 – 177, page 7</b> |
| 40 |                                                           |     |                                                                                                                                                                                                                                                                                                                                                                                                                                   |
| 41 |                                                           |     |                                                                                                                                                                                                                                                                                                                                                                                                                                   |
| 42 |                                                           |     |                                                                                                                                                                                                                                                                                                                                                                                                                                   |
| 43 |                                                           |     |                                                                                                                                                                                                                                                                                                                                                                                                                                   |
| 44 |                                                           |     |                                                                                                                                                                                                                                                                                                                                                                                                                                   |
| 45 |                                                           |     |                                                                                                                                                                                                                                                                                                                                                                                                                                   |
| 46 |                                                           |     |                                                                                                                                                                                                                                                                                                                                                                                                                                   |
| 47 |                                                           |     |                                                                                                                                                                                                                                                                                                                                                                                                                                   |
| 48 | Participant<br>timeline                                   | 13  | Time schedule of enrolment, interventions (including any run-ins and<br>washouts), assessments, and visits for participants. A schematic<br>diagram is highly recommended (see Figure)<br>→ <b>Lines 170 – 177, page 7 + Line 188 page 8 + Line 224 page 10</b>                                                                                                                                                                   |
| 49 |                                                           |     |                                                                                                                                                                                                                                                                                                                                                                                                                                   |
| 50 |                                                           |     |                                                                                                                                                                                                                                                                                                                                                                                                                                   |
| 51 |                                                           |     |                                                                                                                                                                                                                                                                                                                                                                                                                                   |
| 52 |                                                           |     |                                                                                                                                                                                                                                                                                                                                                                                                                                   |
| 53 |                                                           |     |                                                                                                                                                                                                                                                                                                                                                                                                                                   |
| 54 |                                                           |     |                                                                                                                                                                                                                                                                                                                                                                                                                                   |
| 55 |                                                           |     |                                                                                                                                                                                                                                                                                                                                                                                                                                   |
| 56 |                                                           |     |                                                                                                                                                                                                                                                                                                                                                                                                                                   |
| 57 |                                                           |     |                                                                                                                                                                                                                                                                                                                                                                                                                                   |
| 58 |                                                           |     |                                                                                                                                                                                                                                                                                                                                                                                                                                   |
| 59 |                                                           |     |                                                                                                                                                                                                                                                                                                                                                                                                                                   |
| 60 |                                                           |     |                                                                                                                                                                                                                                                                                                                                                                                                                                   |

|   |             |    |                                                                     |
|---|-------------|----|---------------------------------------------------------------------|
| 1 |             |    |                                                                     |
| 2 | Sample size | 14 | Estimated number of participants needed to achieve study objectives |
| 3 |             |    | and how it was determined, including clinical and statistical       |
| 4 |             |    | assumptions supporting any sample size calculations                 |
| 5 |             |    | <b>→ Lines 195 – 200, page 9</b>                                    |
| 6 |             |    |                                                                     |
| 7 | Recruitment | 15 | Strategies for achieving adequate participant enrolment to reach    |
| 8 |             |    | target sample size                                                  |
| 9 |             |    | <b>→ Lines 167 – 168 page 7</b>                                     |

### Methods: Assignment of interventions (for controlled trials)

#### Allocation:

|    |                |     |                                                                         |
|----|----------------|-----|-------------------------------------------------------------------------|
| 14 |                |     |                                                                         |
| 15 | Sequence       | 16a | Method of generating the allocation sequence (eg, computer-             |
| 16 | generation     |     | generated random numbers), and list of any factors for stratification.  |
| 17 |                |     | To reduce predictability of a random sequence, details of any planned   |
| 18 |                |     | restriction (eg, blocking) should be provided in a separate document    |
| 19 |                |     | that is unavailable to those who enrol participants or assign           |
| 20 |                |     | interventions                                                           |
| 21 |                |     | <b>Lines 179 – 183 page 8</b>                                           |
| 22 |                |     |                                                                         |
| 23 |                |     |                                                                         |
| 24 | Allocation     | 16b | Mechanism of implementing the allocation sequence (eg, central          |
| 25 | concealment    |     | telephone; sequentially numbered, opaque, sealed envelopes),            |
| 26 | mechanism      |     | describing any steps to conceal the sequence until interventions are    |
| 27 |                |     | assigned                                                                |
| 28 |                |     | <b>Lines 179 – 183 page 8</b>                                           |
| 29 |                |     |                                                                         |
| 30 |                |     |                                                                         |
| 31 | Implementation | 16c | Who will generate the allocation sequence, who will enrol participants, |
| 32 |                |     | and who will assign participants to interventions                       |
| 33 |                |     | <b>Lines 179 – 183 page 8</b>                                           |
| 34 |                |     |                                                                         |
| 35 | Blinding       | 17a | Who will be blinded after assignment to interventions (eg, trial        |
| 36 | (masking)      |     | participants, care providers, outcome assessors, data analysts), and    |
| 37 |                |     | how                                                                     |
| 38 |                |     |                                                                         |
| 39 |                | 17b | If blinded, circumstances under which unblinding is permissible, and    |
| 40 |                |     | procedure for revealing a participant's allocated intervention during   |
| 41 |                |     | the trial                                                               |

### Methods: Data collection, management, and analysis

|    |                 |     |                                                                          |
|----|-----------------|-----|--------------------------------------------------------------------------|
| 44 |                 |     |                                                                          |
| 45 | Data collection | 18a | Plans for assessment and collection of outcome, baseline, and other      |
| 46 | methods         |     | trial data, including any related processes to promote data quality (eg, |
| 47 |                 |     | duplicate measurements, training of assessors) and a description of      |
| 48 |                 |     | study instruments (eg, questionnaires, laboratory tests) along with      |
| 49 |                 |     | their reliability and validity, if known. Reference to where data        |
| 50 |                 |     | collection forms can be found, if not in the protocol                    |
| 51 |                 |     | <b>→ Lines 185 – 188 page 8</b>                                          |
| 52 |                 |     |                                                                          |
| 53 |                 |     |                                                                          |
| 54 |                 | 18b | Plans to promote participant retention and complete follow-up,           |
| 55 |                 |     | including list of any outcome data to be collected for participants who  |
| 56 |                 |     | discontinue or deviate from intervention protocols                       |
| 57 |                 |     |                                                                          |
| 58 |                 |     |                                                                          |

|    |             |     |                                                                          |
|----|-------------|-----|--------------------------------------------------------------------------|
| 1  |             |     |                                                                          |
| 2  | Data        | 19  | Plans for data entry, coding, security, and storage, including any       |
| 3  | management  |     | related processes to promote data quality (eg, double data entry;        |
| 4  |             |     | range checks for data values). Reference to where details of data        |
| 5  |             |     | management procedures can be found, if not in the protocol               |
| 6  |             |     | → <b>Lines 185 – 188 page 8</b>                                          |
| 7  |             |     |                                                                          |
| 8  | Statistical | 20a | Statistical methods for analysing primary and secondary outcomes.        |
| 9  | methods     |     | Reference to where other details of the statistical analysis plan can be |
| 10 |             |     | found, if not in the protocol                                            |
| 11 |             |     | → <b>Lines 201 – 203, page 9</b>                                         |
| 12 |             |     |                                                                          |
| 13 |             | 20b | Methods for any additional analyses (eg, subgroup and adjusted           |
| 14 |             |     | analyses)                                                                |
| 15 |             |     |                                                                          |
| 16 |             | 20c | Definition of analysis population relating to protocol non-adherence     |
| 17 |             |     | (eg, as randomised analysis), and any statistical methods to handle      |
| 18 |             |     | missing data (eg, multiple imputation)                                   |
| 19 |             |     |                                                                          |

### Methods: Monitoring

|    |                 |     |                                                                        |
|----|-----------------|-----|------------------------------------------------------------------------|
| 20 |                 |     |                                                                        |
| 21 |                 |     |                                                                        |
| 22 | Data monitoring | 21a | Composition of data monitoring committee (DMC); summary of its role    |
| 23 |                 |     | and reporting structure; statement of whether it is independent from   |
| 24 |                 |     | the sponsor and competing interests; and reference to where further    |
| 25 |                 |     | details about its charter can be found, if not in the protocol.        |
| 26 |                 |     | Alternatively, an explanation of why a DMC is not needed               |
| 27 |                 |     |                                                                        |
| 28 |                 | 21b | Description of any interim analyses and stopping guidelines, including |
| 29 |                 |     | who will have access to these interim results and make the final       |
| 30 |                 |     | decision to terminate the trial                                        |
| 31 |                 |     |                                                                        |
| 32 |                 |     |                                                                        |
| 33 | Harms           | 22  | Plans for collecting, assessing, reporting, and managing solicited and |
| 34 |                 |     | spontaneously reported adverse events and other unintended effects     |
| 35 |                 |     | of trial interventions or trial conduct                                |
| 36 |                 |     |                                                                        |
| 37 | Auditing        | 23  | Frequency and procedures for auditing trial conduct, if any, and       |
| 38 |                 |     | whether the process will be independent from investigators and the     |
| 39 |                 |     | sponsor                                                                |
| 40 |                 |     |                                                                        |

### Ethics and dissemination

|    |                   |     |                                                                               |
|----|-------------------|-----|-------------------------------------------------------------------------------|
| 41 |                   |     |                                                                               |
| 42 |                   |     |                                                                               |
| 43 | Research ethics   | 24  | Plans for seeking research ethics committee/institutional review board        |
| 44 | approval          |     | (REC/IRB) approval                                                            |
| 45 |                   |     | → <b>Lines 206 – 210 page 9</b>                                               |
| 46 |                   |     |                                                                               |
| 47 |                   |     |                                                                               |
| 48 | Protocol          | 25  | Plans for communicating important protocol modifications (eg,                 |
| 49 | amendments        |     | changes to eligibility criteria, outcomes, analyses) to relevant parties      |
| 50 |                   |     | (eg, investigators, REC/IRBs, trial participants, trial registries, journals, |
| 51 |                   |     | regulators)                                                                   |
| 52 |                   |     |                                                                               |
| 53 | Consent or assent | 26a | Who will obtain informed consent or assent from potential trial               |
| 54 |                   |     | participants or authorised surrogates, and how (see Item 32)                  |
| 55 |                   |     |                                                                               |
| 56 |                   |     |                                                                               |
| 57 |                   |     |                                                                               |
| 58 |                   |     |                                                                               |
| 59 |                   |     |                                                                               |
| 60 |                   |     |                                                                               |

|    |                               |     |                                                                                                                                                                                                                                                                                     |
|----|-------------------------------|-----|-------------------------------------------------------------------------------------------------------------------------------------------------------------------------------------------------------------------------------------------------------------------------------------|
| 1  |                               | 26b | Additional consent provisions for collection and use of participant data and biological specimens in ancillary studies, if applicable                                                                                                                                               |
| 2  |                               |     |                                                                                                                                                                                                                                                                                     |
| 3  |                               |     |                                                                                                                                                                                                                                                                                     |
| 4  | Confidentiality               | 27  | How personal information about potential and enrolled participants will be collected, shared, and maintained in order to protect confidentiality before, during, and after the trial                                                                                                |
| 5  |                               |     | → <b>Lines 186 – 187, page 8</b>                                                                                                                                                                                                                                                    |
| 6  |                               |     |                                                                                                                                                                                                                                                                                     |
| 7  |                               |     |                                                                                                                                                                                                                                                                                     |
| 8  |                               |     |                                                                                                                                                                                                                                                                                     |
| 9  |                               |     |                                                                                                                                                                                                                                                                                     |
| 10 | Declaration of interests      | 28  | Financial and other competing interests for principal investigators for the overall trial and each study site                                                                                                                                                                       |
| 11 |                               |     | → <b>Line 213, page 9</b>                                                                                                                                                                                                                                                           |
| 12 |                               |     |                                                                                                                                                                                                                                                                                     |
| 13 |                               |     |                                                                                                                                                                                                                                                                                     |
| 14 | Access to data                | 29  | Statement of who will have access to the final trial dataset, and disclosure of contractual agreements that limit such access for investigators                                                                                                                                     |
| 15 |                               |     |                                                                                                                                                                                                                                                                                     |
| 16 |                               |     |                                                                                                                                                                                                                                                                                     |
| 17 |                               |     |                                                                                                                                                                                                                                                                                     |
| 18 | Ancillary and post-trial care | 30  | Provisions, if any, for ancillary and post-trial care, and for compensation to those who suffer harm from trial participation                                                                                                                                                       |
| 19 |                               |     |                                                                                                                                                                                                                                                                                     |
| 20 |                               |     |                                                                                                                                                                                                                                                                                     |
| 21 | Dissemination policy          | 31a | Plans for investigators and sponsor to communicate trial results to participants, healthcare professionals, the public, and other relevant groups (eg, via publication, reporting in results databases, or other data sharing arrangements), including any publication restrictions |
| 22 |                               |     | → <b>Lines 206 – 207, page 9</b>                                                                                                                                                                                                                                                    |
| 23 |                               |     |                                                                                                                                                                                                                                                                                     |
| 24 |                               |     |                                                                                                                                                                                                                                                                                     |
| 25 |                               |     |                                                                                                                                                                                                                                                                                     |
| 26 |                               |     |                                                                                                                                                                                                                                                                                     |
| 27 |                               |     |                                                                                                                                                                                                                                                                                     |
| 28 |                               | 31b | Authorship eligibility guidelines and any intended use of professional writers                                                                                                                                                                                                      |
| 29 |                               |     |                                                                                                                                                                                                                                                                                     |
| 30 |                               |     |                                                                                                                                                                                                                                                                                     |
| 31 |                               | 31c | Plans, if any, for granting public access to the full protocol, participant-level dataset, and statistical code                                                                                                                                                                     |
| 32 |                               |     |                                                                                                                                                                                                                                                                                     |
| 33 |                               |     |                                                                                                                                                                                                                                                                                     |
| 34 | <b>Appendices</b>             |     |                                                                                                                                                                                                                                                                                     |
| 35 |                               |     |                                                                                                                                                                                                                                                                                     |
| 36 | Informed consent materials    | 32  | Model consent form and other related documentation given to participants and authorised surrogates                                                                                                                                                                                  |
| 37 |                               |     |                                                                                                                                                                                                                                                                                     |
| 38 |                               |     |                                                                                                                                                                                                                                                                                     |
| 39 | Biological specimens          | 33  | Plans for collection, laboratory evaluation, and storage of biological specimens for genetic or molecular analysis in the current trial and for future use in ancillary studies, if applicable                                                                                      |
| 40 |                               |     |                                                                                                                                                                                                                                                                                     |
| 41 |                               |     |                                                                                                                                                                                                                                                                                     |
| 42 |                               |     |                                                                                                                                                                                                                                                                                     |

---

\*It is strongly recommended that this checklist be read in conjunction with the SPIRIT 2013 Explanation & Elaboration for important clarification on the items. Amendments to the protocol should be tracked and dated. The SPIRIT checklist is copyrighted by the SPIRIT Group under the Creative Commons "[Attribution-NonCommercial-NoDerivs 3.0 Unported](https://creativecommons.org/licenses/by-nc-nd/3.0/)" license.

# BMJ Open

## Evaluation of a prescription support-tool for chronic management of oral antithrombotic combinations in adults using clinical vignettes: protocol of a randomized controlled trial

|                               |                                                                                                                                                                                                                                                                                                                                                                                                                                                                                                                                                                                                                                                                                                                                                                                                                                                                                                                                                                                                                                                                                                                                                                                                                                                                                                                                                                                                                                                                                                                                                                                                                                                                                                                                                                                                                                                                                                                                                                                                                                                                                                                                                                                                                                                                                                                                                                                  |
|-------------------------------|----------------------------------------------------------------------------------------------------------------------------------------------------------------------------------------------------------------------------------------------------------------------------------------------------------------------------------------------------------------------------------------------------------------------------------------------------------------------------------------------------------------------------------------------------------------------------------------------------------------------------------------------------------------------------------------------------------------------------------------------------------------------------------------------------------------------------------------------------------------------------------------------------------------------------------------------------------------------------------------------------------------------------------------------------------------------------------------------------------------------------------------------------------------------------------------------------------------------------------------------------------------------------------------------------------------------------------------------------------------------------------------------------------------------------------------------------------------------------------------------------------------------------------------------------------------------------------------------------------------------------------------------------------------------------------------------------------------------------------------------------------------------------------------------------------------------------------------------------------------------------------------------------------------------------------------------------------------------------------------------------------------------------------------------------------------------------------------------------------------------------------------------------------------------------------------------------------------------------------------------------------------------------------------------------------------------------------------------------------------------------------|
| Journal:                      | <i>BMJ Open</i>                                                                                                                                                                                                                                                                                                                                                                                                                                                                                                                                                                                                                                                                                                                                                                                                                                                                                                                                                                                                                                                                                                                                                                                                                                                                                                                                                                                                                                                                                                                                                                                                                                                                                                                                                                                                                                                                                                                                                                                                                                                                                                                                                                                                                                                                                                                                                                  |
| Manuscript ID                 | bmjopen-2018-025544.R1                                                                                                                                                                                                                                                                                                                                                                                                                                                                                                                                                                                                                                                                                                                                                                                                                                                                                                                                                                                                                                                                                                                                                                                                                                                                                                                                                                                                                                                                                                                                                                                                                                                                                                                                                                                                                                                                                                                                                                                                                                                                                                                                                                                                                                                                                                                                                           |
| Article Type:                 | Protocol                                                                                                                                                                                                                                                                                                                                                                                                                                                                                                                                                                                                                                                                                                                                                                                                                                                                                                                                                                                                                                                                                                                                                                                                                                                                                                                                                                                                                                                                                                                                                                                                                                                                                                                                                                                                                                                                                                                                                                                                                                                                                                                                                                                                                                                                                                                                                                         |
| Date Submitted by the Author: | 19-Nov-2018                                                                                                                                                                                                                                                                                                                                                                                                                                                                                                                                                                                                                                                                                                                                                                                                                                                                                                                                                                                                                                                                                                                                                                                                                                                                                                                                                                                                                                                                                                                                                                                                                                                                                                                                                                                                                                                                                                                                                                                                                                                                                                                                                                                                                                                                                                                                                                      |
| Complete List of Authors:     | <p>ZERAH, Lorene; Sorbonne Université, INSERM, Institut Pierre Louis d'Epidémiologie et de Santé Publique, UMR1123; AP-HP, Hôpital Pitié-Salpêtrière, Département Biostatistique Santé Publique et Information Médicale, Unité de Recherche Clinique PSL-CFX, Centre de Pharmacoepidémiologie (Cephepi), CIC-1421</p> <p>Bonnet-Zamponi, Dominique; AP-HP, Hôpital Pitié-Salpêtrière, Département Biostatistique Santé Publique et Information Médicale, Unité de Recherche Clinique PSL-CFX, Centre de Pharmacoepidémiologie (Cephepi), CIC-1421; Observatoire du Médicament des Dispositifs Médicaux et de l'Innovation Thérapeutique Ile de France, OMEDIT</p> <p>Frappé, Paul; Institut de recherche en médecine générale; University of Saint-Etienne, Department of General Practice</p> <p>Hauguel-Moreau, Marie; Assistance Publique - Hopitaux de Paris, Département de cardiologie, Hôpitaux universitaires Pitié-Salpêtrière-Charles Foix</p> <p>De Rycke, Yann; AP-HP, Hôpital Pitié-Salpêtrière, Département Biostatistique Santé Publique et Information Médicale, Unité de Recherche Clinique PSL-CFX, Centre de Pharmacoepidémiologie (Cephepi), CIC-1421</p> <p>Magnier, Anne-Marie; Assistance Publique - Hopitaux de Paris, Département de médecine générale, Hôpitaux universitaires Pitié-Salpêtrière-Charles Foix</p> <p>Pautas, Eric; Assistance Publique - Hopitaux de Paris, Département de gériatrie, Hôpitaux universitaires Pitié-Salpêtrière-Charles Foix</p> <p>Charles, Pierre; Institut Mutualiste Montsouris, Médecine Interne</p> <p>Collet, Jean-philippe; Assistance Publique - Hopitaux de Paris, Département de cardiologie, Hôpitaux universitaires Pitié-Salpêtrière-Charles Foix</p> <p>Dechartres, Agnes; AP-HP, Hôpital Pitié-Salpêtrière, Département Biostatistique Santé Publique et Information Médicale, Unité de Recherche Clinique PSL-CFX, Centre de Pharmacoepidémiologie (Cephepi), CIC-1421; Sorbonne Université, INSERM, Institut Pierre Louis d'Epidémiologie et de Santé Publique, UMR1136</p> <p>Tubach, Florence; Sorbonne Université, INSERM, Institut Pierre Louis d'Epidémiologie et de Santé Publique, UMR1123; AP-HP, Hôpital Pitié-Salpêtrière, Département Biostatistique Santé Publique et Information Médicale, Unité de Recherche Clinique PSL-CFX, Centre de Pharmacoepidémiologie (Cephepi), CIC-1421</p> |

1  
2  
3  
4  
5  
6  
7  
8  
9  
10  
11  
12  
13  
14  
15  
16  
17  
18  
19  
20  
21  
22  
23  
24  
25  
26  
27  
28  
29  
30  
31  
32  
33  
34  
35  
36  
37  
38  
39  
40  
41  
42  
43  
44  
45  
46  
47  
48  
49  
50  
51  
52  
53  
54  
55  
56  
57  
58  
59  
60

|                                    |                                                                           |
|------------------------------------|---------------------------------------------------------------------------|
| <b>Primary Subject Heading</b> :   | Pharmacology and therapeutics                                             |
| <b>Secondary Subject Heading</b> : | Cardiovascular medicine, Evidence based practice, Public health           |
| <b>Keywords</b> :                  | prescription support-tool, clinical vignettes, antithrombotic combination |
|                                    |                                                                           |

SCHOLARONE™  
Manuscripts

1  
2  
3 **Evaluation of a prescription support-tool for chronic management of oral**  
4 **antithrombotic combinations in adults using clinical vignettes: protocol of a randomized**  
5 **controlled trial**  
6  
7  
8  
9

10  
11  
12 Zerah L<sup>1</sup>, Bonnet-Zamponi D<sup>1,2</sup>, Frappé P<sup>3,4</sup>, Hauguel-Moreau M<sup>5</sup>, De Rycke Y<sup>1</sup>, Magnier  
13 AM<sup>6</sup>, Pautas E<sup>7</sup>, Charles P<sup>8</sup>, Collet JP<sup>5</sup>, Dechartres A<sup>9</sup>, Tubach F<sup>1</sup>  
14  
15

- 16  
17 1. Sorbonne Université, INSERM, Institut Pierre Louis d'Epidémiologie et de Santé  
18 Publique, UMR1123, AP-HP, Hôpital Pitié-Salpêtrière, Département Biostatistique Santé  
19 Publique et Information Médicale, Unité de Recherche Clinique PSL-CFX, Centre de  
20 Pharmacoépidémiologie (Cephepi), CIC-1421, Paris, France  
21  
22 2. Observatoire du Médicament des Dispositifs Médicaux et de l'Innovation Thérapeutique  
23 Ile de France (OMEDIT), Paris, France.  
24  
25 3. Institut de recherche en médecine générale, Paris, France  
26  
27 4. Department of General Practice, University of Saint-Etienne, Saint-Etienne, France  
28  
29 5. Sorbonne Université, AP-HP, Département de cardiologie, Hôpitaux universitaires Pitié-  
30 Salpêtrière-Charles Foix, 75013 Paris, France  
31  
32 6. Sorbonne Université, AP-HP, Département de médecine générale, Hôpitaux universitaires  
33 Pitié-Salpêtrière-Charles Foix, 75013 Paris, France  
34  
35 7. Sorbonne Université, AP-HP, Département de gériatrie, Hôpitaux universitaires Pitié-  
36 Salpêtrière-Charles Foix, 75013 Paris, France  
37  
38 8. Département de médecine interne, Institut Mutualiste Montsouris, 75014 Paris, France  
39  
40 9. Sorbonne Université, INSERM, Institut Pierre Louis d'Epidémiologie et de Santé  
41 Publique, UMR1136, AP-HP, Hôpital Pitié-Salpêtrière, Département Biostatistique Santé  
42 Publique et Information Médicale, Unité de Recherche Clinique PSL-CFX, Centre de  
43 Pharmacoépidémiologie (Cephepi), CIC-1421, Paris, France  
44  
45  
46

47 **\* Corresponding author: Dr Lorene Zerah**

48 Correspondence to: [lorene.zerah@inserm.fr](mailto:lorene.zerah@inserm.fr)

49  
50  
51 Address: Département Biostatistique Santé Publique et Information Médicale, Centre de  
52 Pharmacoépidémiologie (Cephepi), Hôpital Pitié-Salpêtrière 47 – 83 boulevard de l'hôpital,  
53 75013, Paris, France  
54

55  
56 Tel: +33 1 42 16 03 47  
57  
58  
59  
60



## ABSTRACT

**Introduction:** Improving the appropriateness of prescriptions of oral antithrombotic (AT) drugs, especially AT combinations, is crucial because these drugs are implicated in bleeding events. We developed a prescription support-tool synthesizing guidelines on chronic management of oral AT combinations. Our main objective is to assess the impact of this tool on improving the prescription of oral AT combinations to comply with guidelines.

**Methods and analysis:** A randomized controlled trial will be conducted among French general practitioners and cardiologists involved in outpatient settings. Physicians will be invited to participate to an online survey by email via physician associations, social networks or word of mouth. They will be randomized to two arms: the experimental arm (access to the prescription support-tool) or the control arm (no prescription support-tool). Then, all participants will be presented 3 different clinical vignettes illustrating outpatient clinical situations and will be asked to propose prescriptions for each vignette (oral AT or not, number of ATs, type, duration and dosage of each AT). A computer-generated randomization scheme implemented in the online survey will be used to allocate physicians to the experimental or control arm, then stratified by medical specialty. The primary outcome will be AT prescriptions that comply with the guidelines. To demonstrate a 5% increase on prescriptions that comply with guidelines, we will need to include a minimum of 230 physicians per arm. A generalized mixed model with a clinical-vignette effect and a physician-effect nested in the arm of the study will be used.

**Ethics and dissemination:** The *Institutional Review Board* of Inserm (IRB00003888) approved our research project (no. 18-492). If the prescription support-tool improves the prescription of oral AT combinations to comply with guidelines, we will create an interactive web tool and will assess its impact in terms of clinical outcomes in real-life.

(ClinicalTrials.gov ID: NCT03630874)

### **Article summary: strengths and limitations of this study**

- Strengths:
  - This is a national, multicenter, randomized controlled study to evaluate the impact of a new and innovative prescription support-tool for oral antithrombotic combination prescriptions.
  - A scientific committee and an expert committee have developed and validated 30 clinical vignettes that we will use to evaluate the prescription support-tool.
- Limitations:
  - Selected physicians may not be representative of general practitioners or cardiologists because they are volunteers.
  - Non-access to the prescription support-tool in the control arm cannot be completely guaranteed (contamination bias).
  - The study will be undertaken in France, which could limit generalizability.

## INTRODUCTION

Antithrombotic (AT) drugs, which include antiplatelet (AP) and anticoagulant (AC) therapies, are used to prevent and treat many cardiovascular disorders.[1] With the increase in prevalence of cardiovascular diseases and medical progress, these treatments are increasingly being prescribed all around the world.[1] Furthermore, ATs are the most frequent drug class implicated in serious and fatal adverse drug events (ADEs), particularly bleeding events,[2,3] among which 70% could be preventable.[4]

AT combinations (dual or triple AT therapy) greatly increase this risk. For example, Hansen et al. reported a 3.1-fold higher risk of fatal and non-fatal bleeding with dual warfarin and clopidogrel therapy and a 3.7-fold higher risk with triple therapy (warfarin, aspirin and clopidogrel) than warfarin monotherapy in patients with non-valvular atrial fibrillation (NV-AF).[5] So far, no study has evaluated the rate of prescriptions of AT combinations not complying with guidelines for adults, taking into account the drugs prescribed but also the dosage and duration of the prescription. Although tools assessing inappropriate prescribing such as the Beers or STOPP/START criteria[6,7] have a section dedicated to ATs, they mention only a few conditions for prescribing AT combinations and are relevant to older people only. Only one Canadian cohort study was specifically designed to assess the appropriateness of AT combinations in adults.[8] It concluded that approximately 15% of patients with AT combinations had inappropriate dual or triple oral AT therapy. However, the appropriateness of the prescribing was limited to the type of drugs combined and did not cover duration and dosage.

To assess the appropriateness of prescribing AT combinations (considering number of drugs, type of drugs, dosage and duration at the same time) in a French cohort of adults, we performed a systematic review of international guidelines (2012-2017) to define which AT combination is recommended, when and for how long. Guidelines dealing with oral AT

1  
2  
3 combinations were numerous (n=63) and none encompassed all the clinical situations  
4  
5 requiring oral AT combinations. This review highlighted the difficulty for a physician to  
6  
7 quickly find the most up-to-date recommendation and the one most relevant to the patient's  
8  
9 clinical situation. These findings agreed with clinical experience and led us to synthesize all  
10  
11 the recommendations into a prescription support-tool (L Zerah et al, A comprehensive  
12  
13 prescription support-tool for chronic management of oral antithrombotic combinations in  
14  
15 adults based on a systematic review of international guidelines) to help physicians prescribe  
16  
17 oral AT combinations.  
18  
19

20  
21 Our hypothesis is that this prescription support-tool would improve the prescription of oral  
22  
23 AT prescriptions to comply with guidelines. Our primary objective is to assess the impact of  
24  
25 this tool on improving the prescription of oral AT combinations to comply with guidelines (in  
26  
27 terms of number of drugs, drug class, duration and dosage at the same time.  
28  
29  
30  
31

## 32 33 **METHODS AND ANALYSIS**

### 34 35 **Study design, study setting and eligibility criteria**

36  
37 A web-based, open randomized controlled trial involving clinical vignettes will be performed  
38  
39 in France via an online survey. This study will be conducted among French general  
40  
41 practitioners and cardiologists involved in outpatient settings. Physicians with an exclusive  
42  
43 hospital practice will not be eligible.  
44  
45

46  
47 Physicians will be identified and contacted to participate in the online survey by email via  
48  
49 physician associations, social networks or word of mouth. The survey will gather information  
50  
51 on physicians' characteristics, including age, sex, medical specialty, place of exercise, years  
52  
53 of medical practice, approximate proportion of patients prescribed oral AT combinations in  
54  
55 their practice, whether physicians feel comfortable or not with management of oral AT  
56  
57 prescriptions, and whether physicians know where to find the most recent guidelines on oral  
58  
59  
60

1  
2  
3 AT prescriptions. Then, physicians will be randomized to 2 arms: the experimental arm,  
4 having access to the prescription support-tool, and the control arm, with no prescription  
5 support-tool. For physicians in the experimental arm, the prescription support-tool will be  
6 provided with an explanatory guide, both downloaded (or just viewed) online in pdf format.  
7  
8 Then, participants from both arms will be presented 3 different clinical vignettes illustrating  
9 outpatient clinical situations and will be asked to propose prescriptions for each vignette (AT  
10 or not, number of ATs, type, duration and dosage of each AT) by answering 5 multiple-choice  
11 questions (each question on a separate web page). Physicians in the experimental arm will  
12 answer each question with the help of the tool, downloadable (or viewable on each page).  
13  
14 Physicians in the control arm will be asked to answer according to their actual clinical  
15 practice as closely as possible. Once the answer is given, physicians cannot go back or change  
16 their answer. Physicians must answer the questions consecutively; however, they will be  
17 allowed to stop and continue at any time (on the same computer). Physicians from the control  
18 arm will be able to download the prescription support-tool once they have completed their  
19 answers for the 3 clinical vignettes.  
20  
21  
22  
23  
24  
25  
26  
27  
28  
29  
30  
31  
32  
33  
34  
35  
36

37 The scientific and expert committee have created and validated 30 clinical vignettes. To  
38 ensure that each clinical vignette will be read the same number of times in both arms, we  
39 created 2 randomized lists of clinical vignettes in blocks of 30 (one list per trial arm). Clinical  
40 vignettes will then be allocated consecutively 3 by 3 to each physician, according to the arm  
41 in which he/she was randomized. Therefore, in each arm, for every 10 physicians randomized,  
42 all clinical vignettes will be read once. The randomization unit will be the physician and the  
43 unit of analysis the clinical vignette. Three clinical vignettes per physician was a middle  
44 ground to ensure the feasibility of the study considering both participants' availability  
45 (acceptable time to complete the clinical vignettes) and statistical need (number of vignettes  
46 needed). To maximize the participation rate, physicians will be sent reminders every 20 days.  
47  
48  
49  
50  
51  
52  
53  
54  
55  
56  
57  
58  
59  
60

## Outcomes

The primary outcome is prescription of AT combinations that comply with guidelines in terms of number of drugs, drug class, duration and dosage at the same time. An expert committee will determine the correct answer, based on the prescription support-tool. Secondary outcomes are (1) prescription of AT combinations that comply with guidelines in terms of number of drugs, drug class, duration and dosage, each assessed separately; (2) prescription of AT combinations that comply with guidelines by medical specialty of physicians responding; (3) the degree of confidence of physicians have that their prescription of AT combinations complies with guidelines; 4) for physicians allocated to receive the prescription support-tool only, the overall usefulness of the tool.

## Intervention

We developed, from a systematic review of international guidelines published between 2012 and 2017 (n=63, bibliography of the guidelines is in **Appendix 1 for reviewers only**), a prescription support-tool (L Zerah et al, A comprehensive prescription support-tool for chronic management of oral antithrombotic combinations in adults based on a systematic review of international guidelines) to help physicians prescribe oral AT combinations for complying with guidelines. This prescription support-tool synthesizes, on a double-sided page, selected international guidelines on chronic management (at least 1 month) of oral AT combinations (indication, drugs, dosages and duration) in adults, without considering in-hospital management and bridging therapy. We excluded particular clinical situations that require inevitably specialist medical advice: active cancer, autoimmune diseases, haemophilia, HIV, paediatrics and pregnancy. The pathologies non-valvular atrial fibrillation, coronary artery disease, ischemic stroke, valvular heart disease, peripheral artery disease and venous thromboembolism are included in this tool because they are the main causes leading to the prescription of ATs (single, dual or triple therapy) in adults.[1] Our tool also specifies the

1  
2  
3 type of oral ATs that should never be combined (combinations of oral anticoagulants [OACs],  
4 combinations of P2Y12 inhibitors or combining one OAC with one potent P2Y12 inhibitor,  
5 namely ticagrelor or prasugrel), the clinical situations in which oral AT combinations are  
6 never indicated and the contraindications of ATs. This prescription support-tool aims to give  
7 physicians quick access to the recommendation that fits most of their patient's clinical  
8 situation. The prescription support-tool is accompanied by an explanatory guide (how to read  
9 and use the tool, with examples). The tool and guide are under currently under review (L  
10 Zerah et al, A comprehensive prescription support-tool for chronic management of oral  
11 antithrombotic combinations in adults based on a systematic review of international  
12 guidelines) and are provided in **Appendixes 2 and 3 for reviewers only**.

### 25 26 **Clinical vignettes**

27  
28 The clinical vignettes illustrating plausible clinical situations have been developed to reflect  
29 clinical practice.[9,10] Such an approach has been found valid in measuring quality of  
30 care.[11,12] Each clinical vignette corresponds to a specific situation for which physicians  
31 will have to indicate, by answering a multiple-choice question, whether they would prescribe  
32 oral ATs, with the number, type, duration and dosage. Each clinical vignette is accompanied  
33 by 5 questions, all on separate web pages. An example of a clinical vignette is presented in  
34 **Appendix 4**. Two physicians (1 cardiologist and 1 internist-geriatrician) from the scientific  
35 committee have created 30 clinical vignettes covering most outpatient clinical situations for  
36 which the long-term use of oral AT combinations (single, dual or triple therapy) is  
37 recommended or needs to be stopped according to the guidelines.

### 51 **Randomization**

52  
53 Physicians will be allocated to the two arms in blocks of 4 by use of a computer-generated  
54 randomization scheme implemented in the online survey (1:1 ratio), then stratified by their  
55 medical specialty.

### **Data collection methods and data management**

Data from physicians' answers will be automatically integrated in a database for statistical analysis. The data will be completely anonymous. In particular, neither the physician's name nor email address will be collected (there will be no login for participants). There is no planned follow-up in this trial.

### **Sample size and statistical considerations**

Considering that 85% of AT prescriptions comply with guidelines in the control arm,[8] to demonstrate an increase in this proportion up to 90% in the experimental arm, we need to include (for a power of 80% and an alpha risk of 5%) a minimum of 229 physicians per arm. To obtain a multiple of 10 physicians (because each physician will complete 3 of 30 vignettes and to have all clinical vignettes completed the same number of times in each arm), we plan to include at least 230 physicians per arm. However, if more physicians participate, all collected data will be considered. Because each participant intends to complete 3 vignettes, this intra-physician correlation will be taken into account in the analysis by using a generalized mixed model with a clinical-vignette effect and a physician-effect nested in the trial arm. All analyses will involve use of R v3.4.0 ([www.cran.r-project.org](http://www.cran.r-project.org)).

### **Scientific and expert committees**

Our study involves a scientific committee and an expert committee. The scientific committee consists of a cardiologist, 2 internist-geriatricians, a general practitioner and 2 epidemiologists. The scientific committee designed the study protocol, created and validated the clinical vignettes and will be responsible for data analysis and writing of the manuscript. The expert committee consists of a cardiologist, a geriatrician, an internist and 2 general practitioners (medical specialties that often deal with patients needing chronic oral AT prescriptions). The expert committee had to review all clinical vignettes with the prescription support-tool (external validation) to confirm the agreement of the vignettes with clinical



1  
2  
3 practice and their readability. The committee estimated the time needed to complete 3 clinical  
4 vignettes at 10 minutes.  
5  
6

### 7 **Patient and Public Involvement**

8  
9  
10 Patients and/or the public have not been involved in the development of the research or in the  
11 study design because only physicians are enrolled and they will not care for patients in the  
12 context of this trial; they just complete clinical vignettes. The main objective of this study is  
13 to evaluate a tool for physicians to help with prescribing AT combinations.  
14  
15  
16  
17  
18  
19  
20

### 21 **ETHICS AND DISSEMINATION**

22  
23 The ethics evaluation committee of Inserm, the *Institutional Review Board* (IRB00003888)  
24 approved our research project (no. 18-492). If the prescription support-tool is associated with  
25 improving the prescription of oral AT combinations to comply with guidelines, it will be  
26 disseminated to help improve AT combination prescriptions. Moreover, we will create an  
27 interactive web tool to improve the ergonomics of the tool and to facilitate the updates. We  
28 will assess the impact of this interactive web tool in terms of clinical outcomes in real life.  
29 This will be the second step, but we feel that we must first demonstrate that the use of the tool  
30 is associated with better prescription appropriateness before launching a trial involving  
31 patients with clinical outcomes. Results of this trial will be disseminated in a paper submitted  
32 to a peer-reviewed journal and presentations at relevant conferences.  
33  
34  
35  
36  
37  
38  
39  
40  
41  
42  
43  
44  
45  
46  
47  
48  
49  
50  
51  
52  
53  
54  
55  
56  
57  
58  
59  
60

## ACKNOWLEDGMENTS

**Authors' contributions:** LZ, DBZ, AD and FT designed the study. YDR designed the statistical analysis. LZ and MHM designed the clinical vignettes. PF, AMM, EP, PC and JPC reviewed the clinical vignettes. LZ, DBZ, MHM, AD and FT validated the vignettes. LZ drafted and prepared the manuscript for publication. All authors re-read and corrected the manuscript. All authors approved the final manuscript.

**Funding statement:** This work was supported by Sorbonne Université (PhD grant).

**Competing interests:** None.

**English editing** by Laura Smales (BioMedEditing).

**We thank Sebastien Zerah who designed the online survey.**

**Ethics approval:** The ethics evaluation committee of Inserm, the *Institutional Review Board* (IRB00003888) reviewed and approved our research project on 06/12/2018 (no. 18-492). The ethics evaluation committee of Inserm reviewed and approved a revised version of the protocol on 10/03/18 (no. 18-492 bis) to allow us to communicate our trial via social networks or word of mouth.

**Trial registration:** ClinicalTrials.gov ID: NCT03630874.

**The study start date is September 2018.**

The systematic review and the prescription support tool are currently under review: Zerah L, Bun RS, Guillo S, Collet JP, Bonnet-Zamponi D, Tubach F. A comprehensive prescription support-tool for chronic management of oral antithrombotic combinations in adults based on a systematic review of international guidelines

**REFERENCES**

1. Mega JL, Simon T. Pharmacology of antithrombotic drugs: an assessment of oral antiplatelet and anticoagulant treatments. *Lancet*. 2015;386(9990):281–91. doi:10.1016/S0140-6736(15)60243-4.
2. Patel NS, Patel TK, Patel PB, Naik VN, Tripathi CB. Hospitalizations due to preventable adverse reactions—a systematic review. *Eur J Clin Pharmacol*. 2017;73(4):385–98. doi:10.1007/s00228-016-2170-6.
3. Wester K, Jönsson AK, Spigset O, Druid H, Hägg S. Incidence of fatal adverse drug reactions: a population based study. *Brit J Clin Pharmacol*. 2008;65(4):573–9. doi:10.1111/j.1365-2125.2007.03064.x.
4. Pirmohamed M, James S, Meakin S, et al. Adverse drug reactions as cause of admission to hospital: prospective analysis of 18 820 patients. *BMJ*. 2004;329(7456):15-19.
5. Hansen ML, Sørensen R, Clausen MT, Fog-Petersen ML, Raunsø J, Gadsbøll N, et al. Risk of bleeding with single, dual, or triple therapy with warfarin, aspirin, and clopidogrel in patients with atrial fibrillation. *Arch Intern Med*. 2010;170(16):1433–41. doi:10.1001/archinternmed.2010.271.
6. O'Mahony D, O'Sullivan D, Byrne S, O'Connor MN, Ryan C, Gallagher P. STOPP/START criteria for potentially inappropriate prescribing in older people: version 2. *Age Ageing*. 2014;44(2):213-218. doi:10.1093/ageing/afu145.
7. By the American Geriatrics Society 2015 Beers Criteria Update Expert Panel. American Geriatrics Society 2015 updated beers criteria for potentially inappropriate medication use in older adults. *J Am Geriatr Soc*. 2015;63(11):2227-2246. doi:10.1111/jgs.13702.
8. Hamilton K, Davis C, Falk J, Singer A, Bugden S. Assessing prescribing of NSAIDs, antiplatelets, and anticoagulants in Canadian family medicine using chart review. *Int J Clin Pharm*. 2016;38(5):1094–1102. doi:10.1007/s11096-016-
9. Engel J, van der Wulp I, Poldervaart JM, Reitsma JB, de Bruijne MC, Wagner C. Clinical decision-making of cardiologists regarding admission and treatment of patients with suspected unstable angina or non-ST-elevation myocardial infarction: protocol of a clinical vignette study. *BMJ Open*. 2015;5(4):e006441. doi: 10.1136/bmjopen-2014-006441.
10. Bachmann LM, Mühleisen A, Bock A, Riet ter G, Held U, Kessels AG. Vignette studies of medical choice and judgement to study caregivers' medical decision behaviour: systematic review. *BMC Med Res Methodol*. 2008;8:50. doi:10.1186/1471-2288-8-50.
11. Peabody JW, Luck J, Glassman P, Dresselhaus TR, Lee M. Comparison of vignettes, standardized patients, and chart abstraction: a prospective validation study of 3 methods for measuring quality. *JAMA*. 2000;283(13):1715-1722.
12. Peabody JW, Luck J, Glassman P, et al. Measuring the quality of physician practice by

1  
2  
3 using clinical vignettes: a prospective validation study. Ann Intern Med.  
4 2004;141(10):771-780.  
5  
6  
7  
8  
9  
10  
11  
12  
13  
14  
15  
16  
17  
18  
19  
20  
21  
22  
23  
24  
25  
26  
27  
28  
29  
30  
31  
32  
33  
34  
35  
36  
37  
38  
39  
40  
41  
42  
43  
44  
45  
46  
47  
48  
49  
50  
51  
52  
53  
54  
55  
56  
57  
58  
59  
60

For peer review only

## Appendix 1: Guideline references from our systematic review (FOR REVIEWERS ONLY) [Article under review elsewhere]

### Coronary Artery Disease: N = 14

1. Levine GN, Bates ER, Bittl JA, et al. 2016 ACC/AHA guideline focused update on duration of dual antiplatelet therapy in patients with coronary artery disease. *J Thorac Cardiovasc Surg* 2016;152:1243-1275. doi:10.1016/j.jtcvs.2016.07.044.
2. Goblirsch G, Bershow S, Cummings K, et al. Stable coronary artery disease. *Institute for Clinical Systems Improvement (ICSI)*. 2013. Available from: <http://citeseerx.ist.psu.edu/viewdoc/download?doi=10.1.1.658.3632&rep=rep1&type=pdf>
3. Montalescot G, Sechtem U, Achenbach S, et al. 2013 ESC guidelines on the management of stable coronary artery disease: the Task Force on the management of stable coronary artery disease of the European Society of Cardiology. *Eur Heart J* 2013;34:2949-3003. doi:10.1093/eurheartj/eh296.
4. National Institute For Health and Care Excellence (NICE). Myocardial infarction: cardiac rehabilitation and prevention of further cardiovascular disease. *NICE Guideline*. 2013. Available from: <https://www.nice.org.uk/guidance/cg172>
5. National Clinical Guideline Centre (UK). MI - secondary prevention: secondary prevention in primary and secondary care for patients following a myocardial infarction: partial update of NICE CG48. *NICE Guideline*. 2013. Available from: <https://www.nice.org.uk/guidance/cg172/documents/mi-secondary-prevention-update-full-version2>
6. Mancini G, Gosselin G, Chow B, et al. Canadian Cardiovascular Society guidelines for the diagnosis and management of stable ischemic heart disease. *Can J Cardiol* 2014;30:837-849. doi:10.1016/j.cjca.2014.05.013.
7. JCS Joint Working Group. Guidelines for secondary prevention of myocardial infarction (JCS 2011). *Circ J* 2013;77:231-248. doi:10.1253/circj.CJ-66-0053.
8. Roffi M, Patrono C, Collet JP, et al. 2015 ESC Guidelines for the management of acute coronary syndromes in patients presenting without persistent ST-segment elevation: Task Force for the Management of Acute Coronary Syndromes in Patients Presenting without Persistent ST-Segment Elevation of the European Society of Cardiology (ESC). *Eur Heart J* 2016;37:267-315. doi:10.1093/eurheartj/ehv320.
9. ST-Elevation Myocardial Infarction Guidelines Group, New Zealand Branch of Cardiac Society of Australia and New Zealand. ST-elevation myocardial infarction: New Zealand Management Guidelines, 2013. *N Z Med J* 2013;126:127-164.
10. Non ST-Elevation Acute Coronary Syndrome Guidelines Group and the New Zealand Branch of the Cardiac Society of Australia and New Zealand. New Zealand 2012 guidelines for the management of non ST-elevation acute coronary syndromes. *N Z Med J* 2012;125:122-147.
11. Feitosa-Filho GS, Baracioli LM, Barbosa CJDG, et al. SBC Guidelines on unstable angina and non-ST-elevation myocardial infarction. *Arq Bras Cardiol* 2015;105:214-227. doi:10.5935/abc.20150118.
12. El-Deeb MH, Riyami Al AM, Riyami Al AA, et al. 2012 Oman Heart Association simplified guidelines for the management of patients with unstable angina/non-ST-elevation myocardial infarction. *Crit Pathw Cardiol*. 2012;11:139-146. doi:10.1097/HPC.0b013e31825ac653.
13. Ibanez B, James S, Agewall S, et al. 2017 ESC Guidelines for the management of acute myocardial infarction in patients presenting with ST-segment elevation. *Eur Heart J* 2017;39:119-177. doi:10.1093/eurheartj/ehx393.
14. National Heart Association of Malaysia. Management of acute ST segment elevation myocardial infarction (STEMI) 2014 - (3RD Edition). Clinical Practice Guidelines. 2014. Available from: <https://www.malaysianheart.org/?p=cpg&a=942>.

| <b>Atrial Fibrillation: N = 12</b>       |                                                                                                                                                                                                                                                                                                                                                                                                                                               |
|------------------------------------------|-----------------------------------------------------------------------------------------------------------------------------------------------------------------------------------------------------------------------------------------------------------------------------------------------------------------------------------------------------------------------------------------------------------------------------------------------|
| 15.                                      | Macle L, Cairns J, Leblanc K, et al. 2016 Focused update of the Canadian cardiovascular society guidelines for the management of atrial fibrillation. <i>Can J Cardiol</i> 2016;32:1170-1185. doi:10.1016/j.cjca.2016.07.591.                                                                                                                                                                                                                 |
| 16.                                      | You JJ, Singer DE, Howard PA, et al. Antithrombotic therapy for atrial fibrillation : Antithrombotic therapy and prevention of thrombosis, 9th ed: American College of Chest Physicians Evidence-Based Clinical Practice Guidelines. <i>Chest</i> 2012;141:e531S–e575S. doi:10.1378/chest.11-2304.                                                                                                                                            |
| 17.                                      | Kirchhof P, Benussi S, Kotecha D, et al. 2016 ESC Guidelines for the management of atrial fibrillation developed in collaboration with EACTS. <i>Eur Heart J</i> 2016;37:2893-2962. doi:10.1093/eurheartj/ehw210.                                                                                                                                                                                                                             |
| 18.                                      | Chiang C-E, Wu T-J, Ueng K-C, et al. 2016 Guidelines of the Taiwan Heart Rhythm Society and the Taiwan Society of Cardiology for the management of atrial fibrillation. <i>J Formos Med Assoc</i> 2016;115:893-952. doi:10.1016/j.jfma.2016.10.005.                                                                                                                                                                                           |
| 19.                                      | Page RL, Joglar JA, Caldwell MA, et al. 2015 ACC/AHA/HRS Guideline for the management of adult patients with supraventricular tachycardia: a report of the American College of Cardiology/American Heart Association Task Force on Clinical Practice Guidelines and the Heart Rhythm Society. <i>J Am Coll Cardiol</i> 2016;67:e27-e115. doi:10.1016/j.jacc.2015.08.856.                                                                      |
| 20.                                      | Ministry of Health British Columbia. Atrial Fibrillation – Diagnosis and Management. <i>BCGuidelines.ca</i> . 2015. Available from: <a href="https://www2.gov.bc.ca/assets/gov/health/practitioner-pro/bc-guidelines/afib_2015_full.pdf">https://www2.gov.bc.ca/assets/gov/health/practitioner-pro/bc-guidelines/afib_2015_full.pdf</a>                                                                                                       |
| 21.                                      | National Institute For Health and Care Excellence (NICE). Atrial fibrillation: management. <i>NICE Guideline</i> . 2014. Available from: <a href="https://www.nice.org.uk/guidance/cg180/resources/atrial-fibrillation-management-pdf-35109805981381">https://www.nice.org.uk/guidance/cg180/resources/atrial-fibrillation-management-pdf-35109805981381</a>                                                                                  |
| 22.                                      | Canadian agency for Drugs and Technologies in Health. New oral anticoagulants for the prevention of thromboembolic events in patients with atrial fibrillation. <i>Canadian agency for Drugs and Technologies in Health</i> . 2012. Available from: <a href="https://www.cadth.ca/sites/default/files/pdf/tr0002_New-Oral-Anticoagulants_rec_e.pdf">https://www.cadth.ca/sites/default/files/pdf/tr0002_New-Oral-Anticoagulants_rec_e.pdf</a> |
| 23.                                      | January CT, Wann LS, Alpert JS, et al. 2014 AHA/ACC/HRS guideline for the management of patients with atrial fibrillation. <i>J Am Coll Cardiol</i> 2014;64:e1-e76. doi:10.1016/j.jacc.2014.03.022.                                                                                                                                                                                                                                           |
| 24.                                      | El-Deeb MH, Sulaiman KJ, Riyami Al AA, et al. 2014 Oman Heart Association protocol for the management of acute atrial fibrillation. <i>Crit Pathw Cardiol</i> 2014;13(3):117-127. doi:10.1097/HPC.0000000000000015.                                                                                                                                                                                                                           |
| 25.                                      | JCS Joint Working Group. Guidelines for pharmacotherapy of atrial fibrillation (JCS 2013). <i>Circ J</i> 2014;78:1997-2021. doi:10.1253/circj.CJ-66-0092.                                                                                                                                                                                                                                                                                     |
| 26.                                      | Ministry of Health British Columbia. Use of Non-Vitamin K Antagonist Oral Anticoagulants (NOAC) in Non-Valvular Atrial Fibrillation. <i>BCGuidelines.ca</i> . 2015. Available from: <a href="https://www2.gov.bc.ca/assets/gov/health/practitioner-pro/bc-guidelines/anticoag_2015november_full.pdf">https://www2.gov.bc.ca/assets/gov/health/practitioner-pro/bc-guidelines/anticoag_2015november_full.pdf</a>                               |
| <b>Peripheral Artery Disease: N = 12</b> |                                                                                                                                                                                                                                                                                                                                                                                                                                               |
| 27.                                      | Baker IDI Heart and Diabetes Institute. National evidence-based guideline on secondary prevention of cardiovascular disease in type 2 diabetes. 2015. Available from: <a href="http://t2dgr.bakeridi.edu.au">http://t2dgr.bakeridi.edu.au</a>                                                                                                                                                                                                 |
| 28.                                      | Rydén L, Grant PJ, Anker SD, et al. ESC Guidelines on diabetes, pre-diabetes, and cardiovascular diseases developed in collaboration with the EASD. <i>Eur Heart J</i> 2013;34:3035-3087. doi:10.1093/eurheartj/eh108.                                                                                                                                                                                                                        |
| 29.                                      | Vandvik PO, Lincoff AM, Gore JM, et al. Primary and secondary prevention of cardiovascular disease: antithrombotic therapy and prevention of thrombosis, 9th ed: American College of Chest Physicians                                                                                                                                                                                                                                         |

Evidence-Based Clinical Practice Guidelines. *Chest* 2012;141(2):e637S–e668S. doi:10.1378/chest.11-2306.

30. American Diabetes Association. Cardiovascular Disease and Risk Management. *Diabetes Care*. 2015;38:S49-S57. doi:10.2337/dc15-S011.

31. Aboyans V, Ricco J-B, Bartelink M-LEL, et al. 2017 ESC Guidelines on the diagnosis and treatment of peripheral arterial diseases, in collaboration with the European Society for Vascular Surgery (ESVS). *Eur Heart J* 2017. doi:10.1093/eurheartj/ehx095.

32. Naylor AR, Ricco JB, de Borst GJ, et al. Management of atherosclerotic carotid and vertebral artery disease: 2017, clinical practice guidelines of the European Society for Vascular Surgery (ESVS). *Eur J Vasc Endovasc Surg* 2018;55:3-81. doi:10.1016/j.ejvs.2017.06.021.

33. Brott TG, Halperin JL, Abbara S, et al. 2011 ASA/ACCF/AHA/AANN/AANS/ACR/ASNR/CNS/SAIP/SCAI/SIR/SNIS/SVM/SVS Guideline on the management of patients with extracranial carotid and vertebral artery disease: executive summary. *Cathet Cardiovasc Intervent*. 2013;81:E75-E123. doi:10.1002/ccd.22983.

34. Alonso-Coello P, Bellmunt S, McGorrian C, et al. Antithrombotic therapy in peripheral artery disease: antithrombotic therapy and prevention of thrombosis, 9th ed: American College of Chest Physicians Evidence-Based Clinical Practice Guidelines. *Chest* 2012;141:e669S–e690S. doi:10.1378/chest.11-2307.

35. JBS Board. Joint British Societies' consensus recommendations for the prevention of cardiovascular disease (JBS3). *Heart* 2014;100:ii1-ii67. doi:10.1136/heartjnl-2014-305693.

36. Gerhard-Herman MD, Gornik HL, Barrett C, et al. 2016 AHA/ACC guideline on the management of patients with lower extremity peripheral artery disease: a report of the American College of Cardiology/American Heart Association Task Force on clinical practice guidelines. *J Am Coll Cardiol* 2017;69:1465-1508. doi:10.1016/j.jacc.2016.11.007.

37. Lawall H, Huppert P, Espinola-Klein C, Zemmrich CS, Ruemenapf G. German guideline on the diagnosis and treatment of peripheral artery disease – a comprehensive update 2016. *Vasa* 2017;46:79-86. doi:10.1024/0301-1526/a000603.

38. Conte MS, Pomposelli FB, Clair DG, et al. Society for Vascular Surgery practice guidelines for atherosclerotic occlusive disease of the lower extremities: management of asymptomatic disease and claudication. *J Vasc Surg* 2015;6:2S–41S.e1. doi:10.1016/j.jvs.2014.12.009.

**Stroke: N = 7**

39. Fuentes B, Gállego J, Gil-Nuñez A, et al. Guidelines for the preventive treatment of ischaemic stroke and TIA (II). Recommendations according to aetiological sub-type. *Neurologia* 2014;29(3):168-183. doi:10.1016/j.nrl.2011.06.003.

40. Intercollegiate Stroke Working Party. National clinical guideline for stroke. *Royal College of physicians*. 2016. Available from: [https://www.strokeaudit.org/SupportFiles/Documents/Guidelines/2016-National-Clinical-Guideline-for-Stroke-5t-\(1\).aspx](https://www.strokeaudit.org/SupportFiles/Documents/Guidelines/2016-National-Clinical-Guideline-for-Stroke-5t-(1).aspx)

41. Wang Y, Liu M, Pu C. 2014 Chinese guidelines for secondary prevention of ischemic stroke and transient ischemic attack. *Int J Stroke* 2017;12:302-320. doi:10.1177/1747493017694391.

42. Ministry of Health British Columbia. Stroke and Transient Ischemic Attack – Acute and Long-Term Management. *BCGuidelines.ca*. 2015. Available from: [https://www2.gov.bc.ca/assets/gov/health/practitioner-pro/bc-guidelines/stroketia\\_2015\\_full.pdf](https://www2.gov.bc.ca/assets/gov/health/practitioner-pro/bc-guidelines/stroketia_2015_full.pdf)

43. National Heart Association of Malaysia. Management of ischaemic stroke. *Clinical Practice Guidelines*. 2012. Available from: [http://www.neuro.org.my/MSN\\_GUIDELINE/MSN\\_GUIDELINE\\_061112%20CPG%20Management%20of%20Stroke%20\(ISBN%20Code\)%202.pdf](http://www.neuro.org.my/MSN_GUIDELINE/MSN_GUIDELINE_061112%20CPG%20Management%20of%20Stroke%20(ISBN%20Code)%202.pdf)

44. Lansberg MG, O'Donnell MJ, Khatri P, et al. Antithrombotic and thrombolytic therapy for ischemic

|    |                                                                                                                                                                                                          |
|----|----------------------------------------------------------------------------------------------------------------------------------------------------------------------------------------------------------|
| 1  | stroke: antithrombotic therapy and prevention of thrombosis, 9th ed: American College of Chest                                                                                                           |
| 2  | Physicians Evidence-Based Clinical Practice Guidelines. <i>Chest</i> 2012;141:e601S–e636S.                                                                                                               |
| 3  | doi:10.1378/chest.11-2302.                                                                                                                                                                               |
| 4  |                                                                                                                                                                                                          |
| 5  |                                                                                                                                                                                                          |
| 6  |                                                                                                                                                                                                          |
| 7  | 45. Ferro JM, Bousser MG, Canhão P, et al. European Stroke Organization guideline for the diagnosis and                                                                                                  |
| 8  | treatment of cerebral venous thrombosis - endorsed by the European Academy of Neurology. <i>Eur J</i>                                                                                                    |
| 9  | <i>Neurol</i> 2017;24:1203-1213. doi:10.1111/ene.13381.                                                                                                                                                  |
| 10 |                                                                                                                                                                                                          |
| 11 | <b>Valvular Heart Disease: N = 3</b>                                                                                                                                                                     |
| 12 | 46. Baumgartner H, Falk V, Bax JJ, et al. 2017 ESC/EACTS Guidelines for the management of valvular                                                                                                       |
| 13 | heart disease. <i>Eur Heart J</i> 2017;38:2739-2791. doi:10.1093/eurheartj/ehx391.                                                                                                                       |
| 14 |                                                                                                                                                                                                          |
| 15 | 47. Nishimura RA, Otto CM, Bonow RO, et al. 2017 AHA/ACC Focused Update of the 2014 AHA/ACC                                                                                                              |
| 16 | Guideline for the Management of Patients With Valvular Heart Disease. <i>J Am Coll Cardiol</i>                                                                                                           |
| 17 | 2017;70:252-289. doi:10.1016/j.jacc.2017.03.011.                                                                                                                                                         |
| 18 |                                                                                                                                                                                                          |
| 19 | 48. Whitlock RP, Sun JC, Fremes SE, Rubens FD, Teoh KH. Antithrombotic and thrombolytic therapy for                                                                                                      |
| 20 | valvular disease : antithrombotic therapy and prevention of thrombosis, 9th ed: American College of                                                                                                      |
| 21 | Chest Physicians Evidence-Based Clinical Practice Guidelines. <i>Chest</i> 2012;141:e576S–e600S.                                                                                                         |
| 22 | doi:10.1378/chest.11-2305.                                                                                                                                                                               |
| 23 |                                                                                                                                                                                                          |
| 24 | <b>Venous thromboembolism disease: N = 9</b>                                                                                                                                                             |
| 25 | 49. Tait C, Baglin T, Watson H, et al. Guidelines on the investigation and management of venous                                                                                                          |
| 26 | thrombosis at unusual sites. <i>Br J Haematol</i> 2012;159:28-38. doi:10.1111/j.1365-2141.2012.09249.x.                                                                                                  |
| 27 |                                                                                                                                                                                                          |
| 28 | 50. National Heart Association of Malaysia. Prevention and treatment of venous thromboembolism. Clinical                                                                                                 |
| 29 | Practice Guidelines. 2013. Available from : <a href="http://www.moh.gov.my/penerbitan/CPG2017/9005.pdf">http://www.moh.gov.my/penerbitan/CPG2017/9005.pdf</a>                                            |
| 30 |                                                                                                                                                                                                          |
| 31 | 51. ICSI. Venous thromboembolism diagnosis and treatment. <i>Institute for Clinical Systems Improvement</i> .                                                                                            |
| 32 | 2012.                                                                                                                                                                                                    |
| 33 | <a href="http://www.seqc.es/download/gpc/29/3089/654287920/2461931/cms/venous_thromboembolism_2012.pdf/">http://www.seqc.es/download/gpc/29/3089/654287920/2461931/cms/venous_thromboembolism_2012.p</a> |
| 34 | <a href="http://www.seqc.es/download/gpc/29/3089/654287920/2461931/cms/venous_thromboembolism_2012.pdf/">df/</a>                                                                                         |
| 35 |                                                                                                                                                                                                          |
| 36 | 52. National Institute For Health and Care Excellence (NICE). Pulmonary embolism. <i>NICE Guideline</i> . 2015.                                                                                          |
| 37 | <a href="https://cks.nice.org.uk/pulmonary-embolism#!scenario">https://cks.nice.org.uk/pulmonary-embolism#!scenario</a> .                                                                                |
| 38 |                                                                                                                                                                                                          |
| 39 | 53. Liu D, Peterson E, Dooner J, et al. Diagnosis and management of iliofemoral deep vein thrombosis:                                                                                                    |
| 40 | clinical practice guideline. <i>CMAJ</i> 2015;187:1288-1296. doi:10.1503/cmaj.141614/-/DC1.                                                                                                              |
| 41 |                                                                                                                                                                                                          |
| 42 | 54. Jacobson BF, Louw S, Mer M, et al. Venous thromboembolism: prophylactic and therapeutic practice                                                                                                     |
| 43 | guideline. <i>S Afr Med J</i> 2013;103:261-7. doi:10.7196/SAMJ.6706.                                                                                                                                     |
| 44 |                                                                                                                                                                                                          |
| 45 | 55. Konstantinides SV, Torbicki A, Agnelli G, et al. 2014 ESC Guidelines on the diagnosis and management                                                                                                 |
| 46 | of acute pulmonary embolism. <i>Eur Heart J</i> 2014;35:3033-3069. doi:10.1093/eurheartj/ehu283.                                                                                                         |
| 47 |                                                                                                                                                                                                          |
| 48 | 56. Baglin T, Bauer K, Douketis J, Büller H, Srivastava A, Johnson G. Duration of anticoagulant therapy                                                                                                  |
| 49 | after a first episode of an unprovoked pulmonary embolus or deep vein thrombosis: guidance from the                                                                                                      |
| 50 | SSC of the ISTH. <i>J Thromb Haemost</i> 2012;10:698-702. doi:10.1111/j.1538-7836.2012.04662.x.                                                                                                          |
| 51 |                                                                                                                                                                                                          |
| 52 | 57. Min S-K, Kim YH, Joh JH, et al. Diagnosis and treatment of lower extremity deep vein thrombosis:                                                                                                     |
| 53 | Korean Practice Guidelines. <i>Vasc Specialist Int</i> 2016;32:77-104. doi:10.5758/vsi.2016.32.3.77.                                                                                                     |
| 54 |                                                                                                                                                                                                          |
| 55 | <b>Antithrombotic: N = 6</b>                                                                                                                                                                             |
| 56 | 58. National Institute For Health and Care Excellence (NICE). Antiplatelet treatment. <i>NICE Guideline</i> .                                                                                            |
| 57 | 2015. <a href="https://cks.nice.org.uk/antiplatelet-treatment#!scenario">https://cks.nice.org.uk/antiplatelet-treatment#!scenario</a> .                                                                  |
| 58 |                                                                                                                                                                                                          |
| 59 | 59. Scottish Intercollegiate Guidelines Network (SIGN). Antithrombotics: indications and management. A                                                                                                   |
| 60 | national clinical guideline. <i>Scottish Intercollegiate Guidelines Network (SIGN)</i> . 2013.                                                                                                           |
|    | <a href="http://www.sign.ac.uk/assets/sign129.pdf">http://www.sign.ac.uk/assets/sign129.pdf</a>                                                                                                          |
|    | 60. Tanguay J-F, Bell AD, Ackman ML, et al. Focused 2012 update of the Canadian Cardiovascular Society                                                                                                   |



1  
2  
3 guidelines for the use of antiplatelet therapy. *Can J Cardiol* 2013;29:1334-1345. doi:  
4 10.1016/j.cjca.2013.07.001

- 5  
6 61. National Institute For Health and Care Excellence (NICE). Anticoagulation - oral. *NICE Guideline*.  
7 2016. <https://cks.nice.org.uk/anticoagulation-oral#!scenario>.  
8  
9 62. Kearon C, Akl EA, Ornelas J, et al. Antithrombotic Therapy for VTE Disease. *Chest* 2016;149:315-352.  
10 doi:10.1016/j.chest.2015.11.026.  
11  
12 63. Valgimigli M, Bueno H, Byrne RA, et al. 2017 ESC focused update on dual antiplatelet therapy in  
13 coronary artery disease developed in collaboration with EACTS. *Eur Heart J* 2017;39:213-260.  
14 doi:10.1093/eurheartj/ehx419.  
15  
16  
17  
18  
19  
20  
21  
22  
23  
24  
25  
26  
27  
28  
29  
30  
31  
32  
33  
34  
35  
36  
37  
38  
39  
40  
41  
42  
43  
44  
45  
46  
47  
48  
49  
50  
51  
52  
53  
54  
55  
56  
57  
58  
59  
60

For peer review only

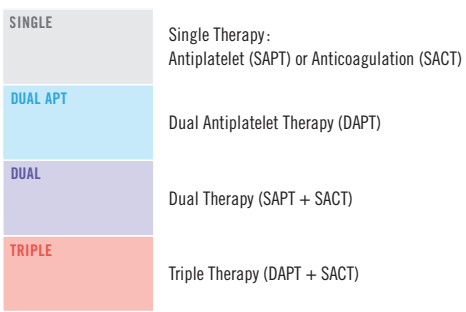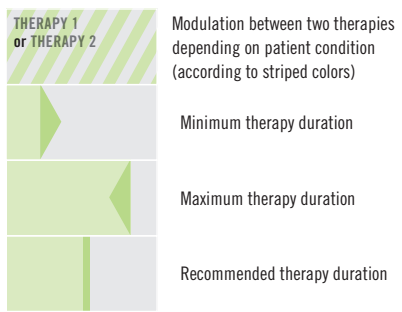

# 2018 SYNTHESIS OF RECOMMENDATIONS FOR CHRONIC MANAGEMENT OF ANTITHROMBOTIC COMBINATIONS

## INDICATIONS, DURATION AND DOSAGE IN ADULTS

### Abbreviations

- ACS Acute Coronary Syndrome
- Aspi Aspirin
- BMS Bare-Metal Stent
- CABG Coronary Artery By Pass Graft
- CHA2DS2-VASc Congestive Heart failure (1)  
H Hypertension (1) A2 Age ≥ 75 (2)
- D Diabetes Mellitus (1) S2 Prior stroke or TIA thromboembolism (2)
- V Vascular disease (1) A Age 65-74 (1)
- Sc Sex category (i.e.: female sex) (1)
- Cilo Cilostazol
- Clopi Clopidogrel
- CTLI Chronic Limb-Threatening Ischemia
- DAPT Dual Antiplatelet Therapy
- DCB Drug-Coated Balloon
- DES Drug-Eluting Stent
- DOA Direct Oral Anticoagulant
- DUAL Dual Therapy: SAPT + SACT
- INR International Normalized Ratio
- LEAD Lower Extremity Artery Disease
- LV Left Ventricular
- NSTE-ACS Non-ST Elevation Acute Coronary Syndrome
- NV-AF Non-valvular atrial fibrillation
- OAC Oral Anticoagulant : VKA or DOA
- PCI Percutaneous coronary intervention (= DES, BMS or DCB)
- Prasu Prasugrel
- SAPT Single Antiplatelet Therapy
- SACT Single Anticoagulation Therapy
- SCAD Stable coronary artery disease
- STEMI ST-Elevation Myocardial Infarction
- TAVR Transcatheter Aortic Valve Replacement
- TIA Transient Ischemic Attack
- Tica Ticagrelor
- Triflu Triflusal
- TRIPLE Triple Therapy: DAPT + SACT
- VKA Vitamin K Antagonist Transcatheter Aortic Valve
- VTE Venous Thromboembolism

### Dosage of antithrombotic drugs

- Aspirin: 75-100 mg/day
- Aspirin/dipyridamole: 25/200 mg twice a day
- Cilostazol: 100 mg twice a day
- Clopidogrel: 75 mg/day
- Prasugrel: 10 mg/day (5 mg/day in patients with body weight < 60 kg)
- Contraindications for prasugrel : previous intracranial haemorrhage, previous ischaemic stroke or transient ischaemic attack, or ongoing bleeds ; prasugrel is not recommended for patients >75 years of age or with a body weight <60 kg.
- Ticagrelor: 90 mg twice a day
- Contraindications for ticagrelor : previous intracranial haemorrhage or ongoing bleeds.
- Triflusal: 600 mg/day
- VKA: target INR 2-3 for NV-AF, VTE; LV thrombus
- Rivaroxaban (Xarelto):
- Venous thrombo-embolism (venous thrombosis/pulmonary embolism): D1 to D21: 15 mg x 2/day then from D22 onwards: 20 mg/day in a single take
- For the prevention of embolic stroke in patients with NV-AF: 20 mg/day in a single take
- No adjustment on weight, age, sex
- Renal failure
- Contraindication with creatinine clearance < 15 ml/min
- With creatinine clearance between 15-49 ml/min:
  - § NV-AF: 15 mg/day
  - § Venous thrombo-embolism: 15 mg x 2/day during the first three weeks then 20 mg/day in a single take
- No adjustment beyond a creatinine clearance > 50 ml/min
- Apixaban (Eliquis):
- For the prevention of embolic stroke in patients with NV-AF:
  - 5 mg x 2/day
  - NV-AF and at least two of the following: age ≥ 80 yo, weight ≤ 60 kg, serum creatinine ≥ 133 micromol/L: 2.5 mg x 2/day
  - With creatinine clearance between 15-29 ml/min: 2.5 mg x 2/day
  - Contraindication with creatinine clearance < 15 ml/min
- Venous thrombo-embolism (venous thrombosis/pulmonary embolism): D1 to D7: 10 mg x 2/day then from D8 onwards: 5 mg x 2/day
- Dabigatran (Pradaxa):
- For the prevention of embolic stroke in patients with NV-AF or VTE treatment, after treatment with a parenteral anticoagulant for at least 5 days : 150 mg x 2/day
- 110 mg x 2/day if :
  - § > 80 yo
  - § Patients also treated with Verapamil
  - § clearance between 30-50 ml/min
- Contraindication with creatinine clearance < 30 ml/min

**THE COCKCROFT AND GAULT FORMULA (1973)**  
 $C_{Cr} = \frac{((140 - \text{Age}) \times \text{Weight})}{(72 \times S_{Cr})} \times 0.85$  (if female)  
 $C_{Cr}$  (creatinine clearance) = mL/minute  
 Age = years Weight = kg  $S_{Cr}$  (serum creatinine) = mg/dL

**! Dual or triple anti-thrombotic therapies are NEVER recommended in :**

- NV-AF CHA2DS2-VASc score ≥ 2 for male and ≥ 3 for female and/or VTE\* (including cerebral venous thrombosis and post-embolic pulmonary hypertension) and/or mechanical heart valve :
  - isolated
  - associated with :
    - ischemic stroke
    - and/or LEAD without recent revascularisation procedure
    - and/or carotid or vertebral stenosis without stent
    - and/or coronary artery disease without recent invasive procedure or acute syndrome
    - and/or bioprosthesis
- Embolic ischemic stroke
- Recurrent stroke despite SAPT
- Mitral stenosis and previous stroke or left atrial thrombus

Indications for SACT

- Carotid or vertebral stenosis (except with stent) } Indications for SAPT
- Carotid or vertebral dissection } SAPT or SACT: 3-6 month
- Valvular bioprosthesis } 3-6 months of SACT (SAPT for patients with aortic bioprosthesis at high risk of bleeding)

**Combinations of anti-thrombotic drugs NEVER recommended :**

- 2 OAC (except in switches)
- 2 P2Y12 inhibitors (= Clopidogrel, Ticagrelor, Prasugrel)
- OAC + Ticagrelor or Prasugrel
- DOA are contraindicated in patients with a mechanical valve

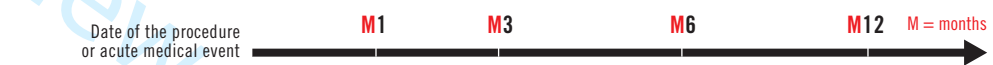

| Prosthesis thrombogenicity | Patient-related risk factor <sup>a</sup> |     |
|----------------------------|------------------------------------------|-----|
|                            | None                                     | ≥1  |
| Low <sup>b</sup>           | 2.5                                      | 3.0 |
| Medium <sup>c</sup>        | 3.0                                      | 3.5 |
| High <sup>d</sup>          | 3.5                                      | 4.0 |

INR = international normalized ratio; LVEF = left ventricular ejection fraction  
<sup>a</sup> Mitral or tricuspid valve replacement, previous thromboembolism; atrial fibrillation, mitral stenosis of any degree, LVEF < 35%  
<sup>b</sup> Carbomedics, Medtronic Hall, ATS, Medtronic Open-Pivot, St-Jude Medical, On-X, Sorin Bicarbon  
<sup>c</sup> Other bileaflet valve with insufficient data  
<sup>d</sup> Lillehei-Kaster, Omniscience, Starr-Edwards (ball-cage), Bjork Shiley and other tilting-disc valves

| STABLE CORONARY ARTERY DISEASE (SCAD)      |                                                                                                                                                                          |                                        |                          |        |  |
|--------------------------------------------|--------------------------------------------------------------------------------------------------------------------------------------------------------------------------|----------------------------------------|--------------------------|--------|--|
|                                            | DAPT                                                                                                                                                                     | Aspi + Clopi                           | DAPT or SINGLE           | SINGLE |  |
| with PCI (DES, BMS or DCB)                 |                                                                                                                                                                          |                                        | Aspi (+ Clopi)           | Aspi   |  |
|                                            | DAPT can be extended to 30 months if no bleeding risk or shortened to 1-3 months if high bleeding risk                                                                   |                                        |                          |        |  |
| + an indication for oral anticoagulation** | TRIPLE OAC + Aspi + Clopi                                                                                                                                                | TRIPLE or DUAL OAC + Aspi AND/OR Clopi | DUAL OAC + Aspi OR Clopi | OAC    |  |
|                                            | Dual therapy with OAC and clopidogrel should be considered as an alternative to 1-month triple therapy in patients in whom the bleeding risk outweighs the ischemic risk |                                        |                          |        |  |
| with CABG                                  | DAPT                                                                                                                                                                     | Aspi + Clopi                           |                          | Aspi   |  |

\* Anticoagulant treatment for VTE disease should be continued for 3 months if there is a triggering factor, 3 to 6 months if it is idiopathic, and for long-term if it is recurrent or associated with a pathology at risk.

\*\* Indication for OAC : Mechanical heart valve prosthesis, NV-AF or flutter with CHA2DS2-VASc score ≥ 2 for men and ≥ 3 for female. Oral anticoagulation therapy to prevent thromboembolism should be considered in male AF patients with a CHA2DS2-VASc score of 1 and in female AF patients with a CHA2DS2-VASc score of 2. For VTE disease, OAC should be continued for 3 months if there is a triggering factor, 3 to 6 months if it is idiopathic, and for long-term if it is recurrent or associated with a pathology at risk.

1  
2  
3  
4  
5  
6  
7  
8  
9  
10  
11  
12  
13  
14  
15  
16  
17  
18  
19  
20  
21  
22  
23  
24  
25  
26  
27  
28  
29  
30  
31  
32  
33  
34  
35  
36  
37  
38  
39  
40  
41  
42  
43  
44  
45  
46

Peer review only - http://bmjopen.bmj.com/site/about/guidelines.xhtml

Date of the procedure or acute medical event

M1

M3

M6

M12

M = months

| ACUTE/RECENT CORONARY SYNDROMES (ACS)                                                                                                                                    |                                                                                                                                                                           |                                             |                                             |            |
|--------------------------------------------------------------------------------------------------------------------------------------------------------------------------|---------------------------------------------------------------------------------------------------------------------------------------------------------------------------|---------------------------------------------|---------------------------------------------|------------|
| 1 NSTEMI-ACS or STEMI                                                                                                                                                    |                                                                                                                                                                           |                                             |                                             |            |
| 2 medically managed                                                                                                                                                      | DAPT                                                                                                                                                                      | Aspi + Tica <b>OR</b> Clopi                 |                                             | SINGLE     |
|                                                                                                                                                                          | DAPT can be extended up to 3 years in high ischaemic-risk patients who have tolerated DAPT without a bleeding complication                                                |                                             |                                             | Aspi       |
|                                                                                                                                                                          | DUAL                                                                                                                                                                      | OAC + Aspi <b>OR</b> Clopi                  |                                             | SINGLE OAC |
| 3 + an indication for oral anticoagulation*                                                                                                                              | DUAL                                                                                                                                                                      | OAC + Aspi <b>OR</b> Clopi                  |                                             | SINGLE OAC |
| 4 with PCI (DES, BMS, or DCB)                                                                                                                                            | DAPT                                                                                                                                                                      | Aspi + Prasu <b>OR</b> Tica <b>OR</b> Clopi |                                             | MONO       |
|                                                                                                                                                                          | DAPT can be extended up to 3 years in high ischaemic-risk patients who have tolerated DAPT without a bleeding complication or shortened to 6 months if high bleeding risk |                                             |                                             | Aspi       |
|                                                                                                                                                                          | TRIPLE                                                                                                                                                                    | TRIPLE or DUAL                              | DUAL                                        | SINGLE     |
| 5 + an indication for oral anticoagulation*                                                                                                                              | OAC + Aspi + Clopi                                                                                                                                                        | OAC + Aspi <b>AND/OR</b> Clopi              | OAC + Aspi <b>OR</b> Clopi                  | OAC        |
| Dual therapy with OAC and clopidogrel should be considered as an alternative to 1-month triple therapy in patients in whom the bleeding risk outweighs the ischemic risk |                                                                                                                                                                           |                                             |                                             |            |
| 6 with CABG                                                                                                                                                              | DAPT                                                                                                                                                                      | Aspi + Prasu <b>OR</b> Tica <b>OR</b> Clopi |                                             | SINGLE     |
|                                                                                                                                                                          | DAPT can be shortened to 6 months if very high bleeding risk                                                                                                              |                                             |                                             | Aspi       |
|                                                                                                                                                                          | DUAL                                                                                                                                                                      | OAC + Aspi <b>OR</b> Clopi                  |                                             | SINGLE OAC |
| 7 + an indication for oral anticoagulation*                                                                                                                              | DUAL                                                                                                                                                                      | OAC + Aspi <b>OR</b> Clopi                  |                                             | SINGLE OAC |
| 8 STEMI                                                                                                                                                                  |                                                                                                                                                                           |                                             |                                             |            |
| 9 with fibrinolytic therapy                                                                                                                                              | DAPT                                                                                                                                                                      | DAPT or SINGLE                              | Aspi (+ Clopi)                              | SINGLE     |
|                                                                                                                                                                          | Aspi + Clopi                                                                                                                                                              |                                             |                                             | Aspi       |
| 10 + PCI (DES, BMS or DCB)                                                                                                                                               | DAPT                                                                                                                                                                      | Aspi + Clopi                                |                                             | SINGLE     |
|                                                                                                                                                                          | DAPT can be extended up to 3 years in high ischaemic-risk patients who have tolerated DAPT without a bleeding complication or shortened to 6 months if high bleeding risk |                                             |                                             | Aspi       |
| 11 with LV thrombus or high risk of LV thrombus**                                                                                                                        | DUAL                                                                                                                                                                      | VKA + Aspi <b>OR</b> Clopi                  | DAPT                                        | SINGLE     |
|                                                                                                                                                                          | Aspi + Prasu <b>OR</b> Tica <b>OR</b> Clopi                                                                                                                               |                                             | Aspi                                        | Aspi       |
| 12 + PCI (DES, BMS or DCB)                                                                                                                                               | TRIPLE                                                                                                                                                                    | VKA + Aspi + Clopi                          | TRIPLE or DUAL                              | SINGLE     |
|                                                                                                                                                                          | Aspi + Prasu <b>OR</b> Tica <b>OR</b> Clopi                                                                                                                               |                                             | DAPT                                        | Aspi       |
| Aspi + (VKA + Clopi) <b>OR</b> (Prasu <b>OR</b> Tica <b>OR</b> Clopi)                                                                                                    |                                                                                                                                                                           |                                             | Aspi + Prasu <b>OR</b> Tica <b>OR</b> Clopi | Aspi       |

42 **Indication for OAC:** Mechanical heart valve prosthesis, NV-AF or flutter with CHA2DS2-VASC score ≥ 2 for men and ≥ 3 for female. Oral anticoagulation therapy to prevent thromboembolism should be considered in male AF patients with a CHA2DS2-VASC score of 1 and in female AF patients with a CHA2DS2-VASC score of 2. For VTE disease, OAC should be continued for 3 months if there is a triggering factor, 3 to 6 months if it is idiopathic, and for long-term if it is recurrent or associated with a pathology at risk.

45 **High risk for LV thrombus:** Ejection Fraction < 40%, Anteroapical wall motion abnormality.

Date of the procedure or acute medical event

M1

M3

M6

M12

M = months

| PERIPHERAL ARTERIAL DISEASES (PADs)                                                                                                 |                                               |                                                         |                                                      |                                                      |
|-------------------------------------------------------------------------------------------------------------------------------------|-----------------------------------------------|---------------------------------------------------------|------------------------------------------------------|------------------------------------------------------|
| CAROTID ARTERY DISEASE OR VERTEBRAL ARTERY DISEASE                                                                                  |                                               |                                                         |                                                      |                                                      |
| carotid and vertebral artery stenosis                                                                                               | + symptomatic                                 | DAPT or SINGLE                                          | Aspi + dipyridamole <b>OR</b> (Aspi <b>OR</b> Clopi) |                                                      |
|                                                                                                                                     | + stenting                                    | DAPT                                                    | DAPT or SINGLE                                       | Aspi + dipyridamole <b>OR</b> (Aspi <b>OR</b> Clopi) |
| carotid artery stenosis                                                                                                             | + stenting + recent ACS and/or PCI (< 1 year) | DAPT                                                    | Aspi + Clopi                                         | SINGLE                                               |
|                                                                                                                                     | 12 months of DAPT from ACS and/or PCI         |                                                         |                                                      | Aspi <b>OR</b> Clopi                                 |
| LOWER EXTREMITY ARTERY DISEASE (LEAD)                                                                                               |                                               |                                                         |                                                      |                                                      |
| LEAD: percutaneous revascularization                                                                                                | DAPT                                          | SINGLE                                                  | Aspi <b>OR</b> Clopi                                 |                                                      |
| Aspi + Clopi                                                                                                                        |                                               |                                                         |                                                      |                                                      |
| + recent ACS and/or PCI (< 1 year)                                                                                                  | DAPT                                          | Aspi + Clopi                                            | 12 months of DAPT from ACS and/or PCI                | SINGLE                                               |
| Aspi <b>OR</b> Clopi                                                                                                                |                                               |                                                         |                                                      |                                                      |
| + an indication for oral anticoagulation* with a low bleeding risk compared to the risk of stroke/CTLI due to stent/graft occlusion | DUAL                                          | DUAL or SINGLE                                          | SINGLE                                               |                                                      |
| OAC + Aspi <b>OR</b> Clopi                                                                                                          |                                               | OAC (+ Aspi <b>OR</b> Clopi)                            | OAC                                                  |                                                      |
| LEAD: surgery revascularization                                                                                                     | DAPT                                          | Below-knee by pass graft surgery with prosthetic grafts |                                                      | SINGLE                                               |
| Aspi + Clopi                                                                                                                        |                                               |                                                         | Aspi <b>OR</b> Clopi                                 |                                                      |

Date of the procedure or acute medical event

M1

M3

M6

M12

STROKE/TRANSIENT ISCHEMIC ATTACK (TIA)

|                                               |                |                                                                                     |
|-----------------------------------------------|----------------|-------------------------------------------------------------------------------------|
| ischemic stroke or TIA due to atherosclerosis | DAPT or SINGLE | Aspi + dipyridamole <b>OR</b> (Aspi <b>OR</b> Clopi <b>OR</b> Trifu <b>OR</b> Cilo) |
|-----------------------------------------------|----------------|-------------------------------------------------------------------------------------|

Date of the procedure or acute medical event

M1

M3

M6

M12

VALVULAR HEART DISEASE

|                                                                  |                |                              |                      |
|------------------------------------------------------------------|----------------|------------------------------|----------------------|
| TAVR                                                             | DAPT or SINGLE | DAPT or SINGLE               | SINGLE               |
| Aspi + Clopi ( <b>OR</b> VKA alone if low bleeding risk)         |                | Aspi <b>AND/OR</b> Clopi     | Aspi <b>OR</b> Clopi |
| mechanical heart valve + thromboembolism despite an adequate INR | DUAL or SINGLE | VKA (+ Aspi <b>OR</b> Clopi) |                      |
| Life long Dual Therapy should be considered                      |                |                              |                      |

\* **Indication for OAC:** Mechanical heart valve prosthesis, NV-AF or flutter with CHA2DS2-VASC score ≥ 2 for men and ≥ 3 for female. Oral anticoagulation therapy to prevent thromboembolism should be considered in male AF patients with a CHA2DS2-VASC score of 1 and in female AF patients with a CHA2DS2-VASC score of 2. For VTE disease, OAC should be continued for 3 months if there is a triggering factor, 3 to 6 months if it is idiopathic, and for long-term if it is recurrent or associated with a pathology at risk.

# How to use the prescription support tool

1  
2  
3  
4  
5  
6  
7  
8  
9  
10  
11  
12  
13  
14  
15  
16  
17  
18  
19  
20  
21  
22  
23  
24  
25  
26  
27  
28  
29  
30  
31  
32  
33  
34  
35  
36  
37  
38  
39  
40  
41

# General presentation of the prescription support tool

**Colour codes for single, dual or triple therapy**

**Codes for duration of treatments**

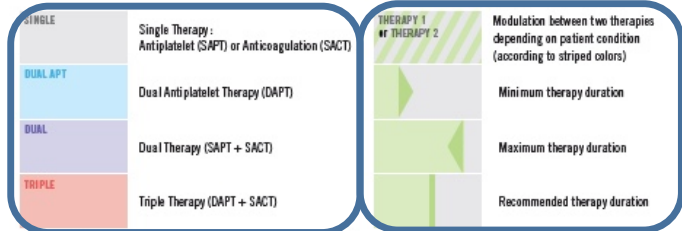

**Abbreviations**

|          |                                                       |
|----------|-------------------------------------------------------|
| ACS      | Acute Coronary Syndrome                               |
| Aspi     | Aspirin                                               |
| H        | Hypertension (1)                                      |
| D        | Diabetes Mellitus (1)                                 |
| V        | Vascular disease (1)                                  |
| So       | Sex category (i.e.: female sex) (1)                   |
| Cilo     | Cloistazol                                            |
| Clopi    | Clopidogrel                                           |
| CTLI     | Chronic Limb-Threatening Ischemia                     |
| DAPT     | Dual Antiplatelet Therapy                             |
| DCB      | Drug-Coated Balloon                                   |
| DES      | Drug-Eluting Stent                                    |
| DOA      | Direct Oral Anticoagulant                             |
| DUAL     | Dual Therapy: SAPT + SACT                             |
| INR      | International Normalized Ratio                        |
| LEAD     | Lower Extremity Artery Disease                        |
| LV       | Left Ventricular                                      |
| NSTE-ACS | Non-ST Elevation Acute Coronary Syndrome              |
| NV-AF    | Non-valvular atrial fibrillation                      |
| OAC      | Oral Anticoagulation: VNA or DOA                      |
| PCI      | Percutaneous coronary intervention (=DES, BMS or DCB) |
| Prasu    | Prasugrel                                             |
| SAPT     | Single Antiplatelet Therapy                           |
| SACT     | Single Anticoagulation Therapy                        |
| SCAD     | Stable coronary artery disease                        |
| STEMI    | ST-Elevation Myocardial Infarction                    |
| TAVR     | Transcatheter Aortic Valve Replacement                |
| TIA      | Transient Ischemic Attack                             |
| Tica     | Ticagrelor                                            |
| Trifu    | Triflusal                                             |
| TRIPLE   | Triple Therapy: DAPT + SACT                           |
| VNA      | Vitamin K Antagonist Transcatheter Aortic Valve       |
| VTE      | Venous Thromboembolism                                |

**Target INR for mechanical valves**

| Prosthesis thrombogenicity | None | ≥1  |
|----------------------------|------|-----|
| Low <sup>a</sup>           | 2.5  | 3.0 |
| Medium <sup>b</sup>        | 3.0  | 3.5 |
| High <sup>c</sup>          | 3.5  | 4.0 |

**THE COCKCROFT AND GAULT FORMULA (1973)**

$$C_{Cr} = \frac{((140 - \text{Age}) \times \text{Weight}) / (72 \times S_{Cr})}{0.85} \text{ (if female)}$$

$$C_{Cr} \text{ (creatinine clearance)} = \text{mL/minute}$$
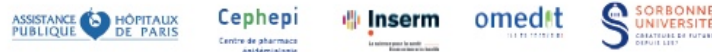

**2018 SYNTHESIS OF RECOMMENDATIONS FOR CHRONIC MANAGEMENT OF ANTITHROMBOTIC COMBINATIONS**  
INDICATIONS, DURATION AND DOSAGE IN ADULTS

**! Dual or triple anti-thrombotic therapies are NEVER recommended in:**

- NV-AF CHA2DS2-VASc score ≥ 2 for male and ≥ 3 for female and/or VTE\* (including cerebral venous thrombosis and post-embolic pulmonary hypertension) and/or mechanical heart valve:
  - isolated
  - associated with:
    - ischemic stroke
    - and/or LEAD without recent revascularisation procedure
    - and/or carotid or vertebral stenosis without stent
    - and/or coronary artery disease without recent invasive procedure or acute syndrome
    - and/or bioprosthesis
- Embolism of stroke
- Recurrent stroke despite SAPT
- Mitral stenosis and previous stroke or left atrial thrombus
- Carotid or vertebral stenosis (except with stent)
- Carotid or vertebral dissection } **Indications for SAPT**
- Valvular bioprosthesis } **3-6 months of SACT (SAPT for patients with aortic bioprosthesis at high risk of bleeding)**

**Indications for SACT**

**Combinations of anti-thrombotic drugs NEVER recommended:**

- 2 OAC (except in switches)
- 2 P2Y12 inhibitors (= Clopidogrel, Ticagrelor, Prasugrel)
- OAC + Ticagrelor or Prasugrel
- DOA are contraindicated in patients with a mechanical valve

Clinical situations for which a single antithrombotic treatment is recommended (NEVER a combination)

Combinations of antithrombotic drugs NEVER recommended

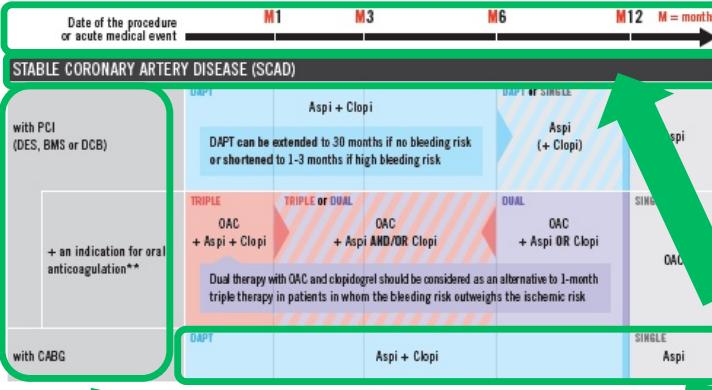

Timeline (in months) since diagnosis or beginning of treatment

Pathology

Time dependant treatments

Recommended dosages for each drugs

Abbreviations used in the tool (with CHA2DS2-VASc score reminder)

Link for recommendations of bleeding during DAPT

**TARGET INR FOR MECHANICAL PROSTHESES: Patient-related risk factors**

| Prosthesis thrombogenicity | None | ≥1  |
|----------------------------|------|-----|
| Low <sup>a</sup>           | 2.5  | 3.0 |
| Medium <sup>b</sup>        | 3.0  | 3.5 |
| High <sup>c</sup>          | 3.5  | 4.0 |

**NR = international normalized ratio; LVEF = left ventricular ejection fraction**

- <sup>a</sup> Mitral or tricuspid valve replacement, previous thromboembolism; atrial fibrillation, mitral stenosis of any degree, LVEF < 35%
- <sup>b</sup> Carbomedics, Medtronic Hall, ATS, Medtronic Open-Pivot, St-Jude Medical, On-X, Sorin Bicarbon
- <sup>c</sup> Other bileaflet valve with insufficient data

**IF BLEEDING DURING DAPT, follow these recommendations (figure 10):**  
<https://www.escardio.org/Clinical-Practice/Guidelines/2017-focused-update-on-dual-antiplatelet-therapy-dot>

**SPECIFIC CONDITIONS REQUIRING SYSTEMATICALLY AN IN-HOSPITAL SPECIALIST HAVE BEEN EXCLUDED:** cancer, auto-immune disease, hemophilia, human immunodeficiency virus (HIV), pediatrics and pregnancy and In-hospital prescriptions (including bridging therapy, perioperative therapy, and treatment of acute phase of cardiovascular event)

**THE COCKCROFT AND GAULT FORMULA (1973)**

$$C_{Cr} = \frac{((140 - \text{Age}) \times \text{Weight}) / (72 \times S_{Cr})}{0.85} \text{ (if female)}$$

$$C_{Cr} \text{ (creatinine clearance)} = \text{mL/minute}$$

**IF BLEEDING DURING DAPT, follow these recommendations (figure 10):**  
<https://www.escardio.org/Clinical-Practice/Guidelines/2017-focused-update-on-dual-antiplatelet-therapy-dot>

**SPECIFIC CONDITIONS REQUIRING SYSTEMATICALLY AN IN-HOSPITAL SPECIALIST HAVE BEEN EXCLUDED:** cancer, auto-immune disease, hemophilia, human immunodeficiency virus (HIV), pediatrics and pregnancy and In-hospital prescriptions (including bridging therapy, perioperative therapy, and treatment of acute phase of cardiovascular event)

Specific conditions not included in the tool

Cockcroft and Gault formula

Treatments performed +/- association with another pathology that may influence antithrombotic treatment

Link for recommendations of bleeding during DAPT

Specific conditions not included in the tool

1  
2  
3  
4  
5  
6  
7  
8  
9  
10  
11  
12  
13  
14  
15  
16  
17  
18  
19  
20  
21  
22  
23  
24  
25  
26  
27  
28  
29  
30  
31  
32  
33  
34  
35  
36  
37  
38  
39  
40  
41

# In practice

## Example 1: one cardiovascular disease

- At your medical consultation, you meet Mr R, 85 years old (weight: 81 kg, body mass index: 24 kg/m<sup>2</sup>).
- Medical history: arterial hypertension and Parkinson disease
- He had surgery 8 months ago for an aortic stenosis: transcatheter aortic valve replacement (TAVR)
- Which antithrombotic therapy is recommended in this clinical situation?



1- Locate in the chapter headings of the tool, the cardiovascular disease of your patient

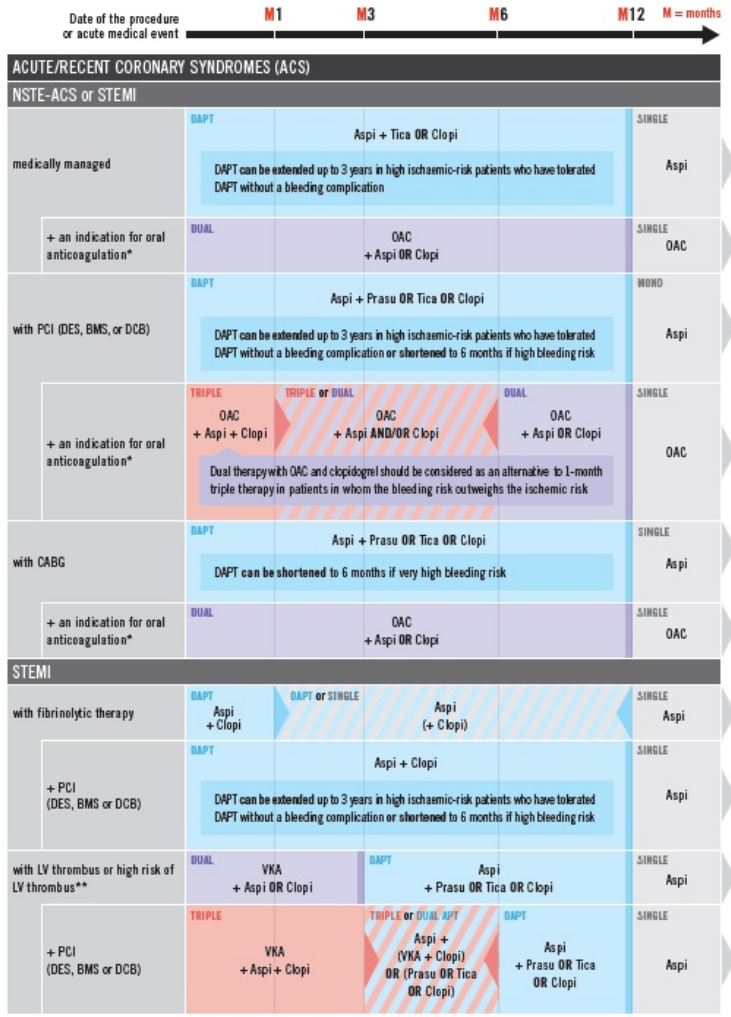

\*Indication for OAC: Mechanical heart valve prosthesis, NV-AF or flutter with CHA2DS2-VASc score ≥ 2 for men and ≥ 3 for female. Oral anticoagulation therapy to prevent thromboembolism should be considered in male AF patients with a CHA2DS2-VASc score of 1 and in female AF patients with a CHA2DS2-VASc score of 2. For VTE disease, OAC should be continued for 3 months if there is a triggering factor, 3 to 6 months if it is idiopathic, and for long-term if it is recurrent or associated with a pathology at risk.

\*\*High risk for LV thrombus: Ejection Fraction < 40%, Anteroapical wall motion abnormality.

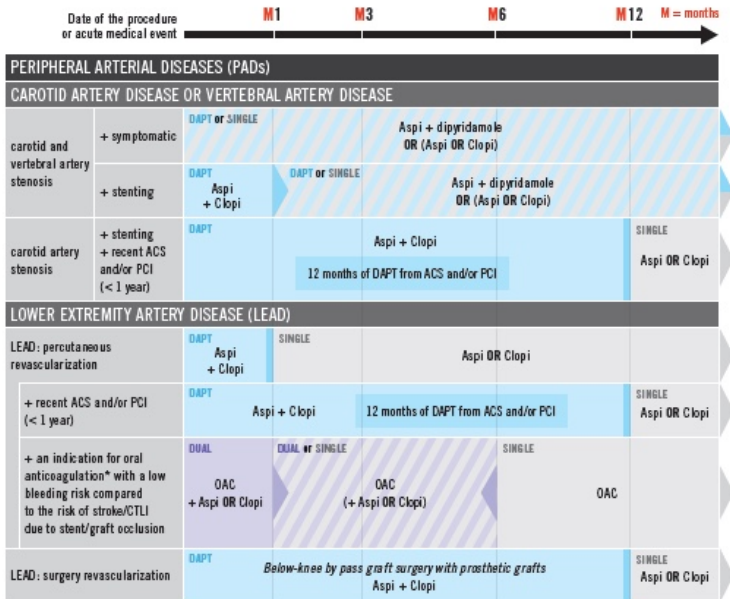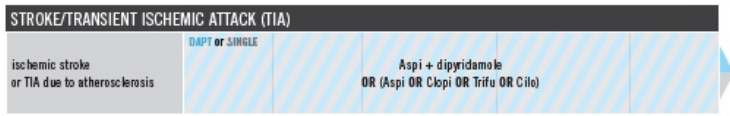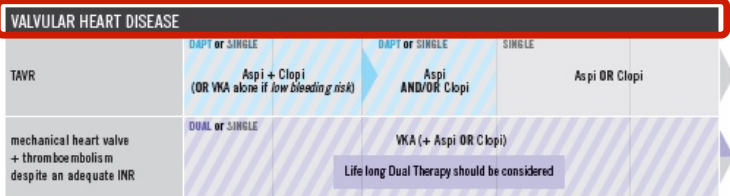

\*Indication for OAC: Mechanical heart valve prosthesis, NV-AF or flutter with CHA2DS2-VASc score ≥ 2 for men and ≥ 3 for female. Oral anticoagulation therapy to prevent thromboembolism should be considered in male AF patients with a CHA2DS2-VASc score of 1 and in female AF patients with a CHA2DS2-VASc score of 2. For VTE disease, OAC should be continued for 3 months if there is a triggering factor, 3 to 6 months if it is idiopathic, and for long-term if it is recurrent or associated with a pathology at risk.

1  
2  
3  
4  
5  
6  
7  
8  
9  
10 **2- Locate**  
11 **the precise**  
12 **clinical**  
13 **situation of**  
14 **your patient**  
15 **(treatment**  
16 **already**  
17 **performed,**  
18 **associated**  
19 **pathologies**  
20 **etc.)**

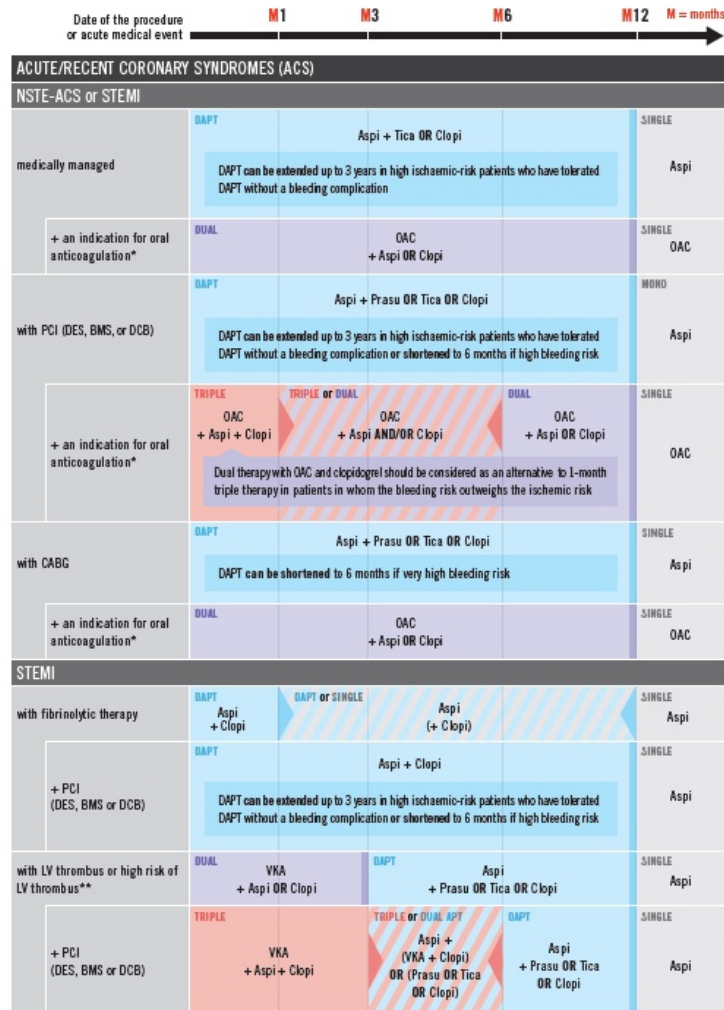

\*Indication for OAC: Mechanical heart valve prosthesis, NV-AF or flutter with CHA2DS2-VASc score ≥ 2 for men and ≥ 3 for female. Oral anticoagulation therapy to prevent thromboembolism should be considered in male AF patients with a CHA2DS2-VASc score of 1 and in female AF patients with a CHA2DS2-VASc score of 2. For VTE disease, OAC should be continued for 3 months if there is a triggering factor, 3 to 6 months if it is idiopathic, and for long-term if it is recurrent or associated with a pathology at risk.

\*\*High risk for LV thrombus: Ejection Fraction < 40%, Anteroapical wall motion abnormality.

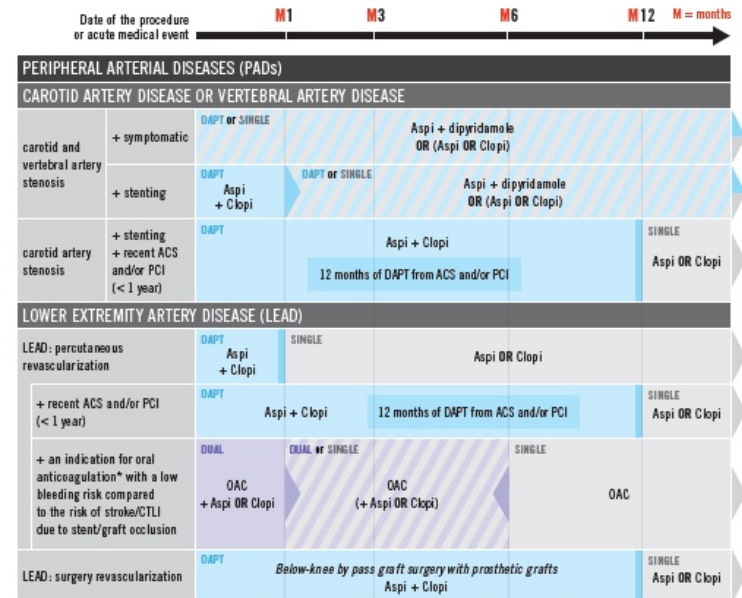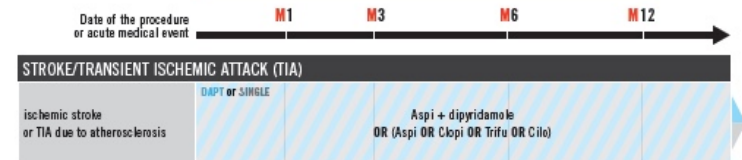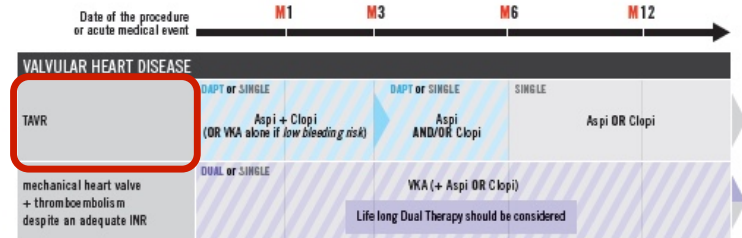

\*Indication for OAC: Mechanical heart valve prosthesis, NV-AF or flutter with CHA2DS2-VASc score ≥ 2 for men and ≥ 3 for female. Oral anticoagulation therapy to prevent thromboembolism should be considered in male AF patients with a CHA2DS2-VASc score of 1 and in female AF patients with a CHA2DS2-VASc score of 2. For VTE disease, OAC should be continued for 3 months if there is a triggering factor, 3 to 6 months if it is idiopathic, and for long-term if it is recurrent or associated with a pathology at risk.

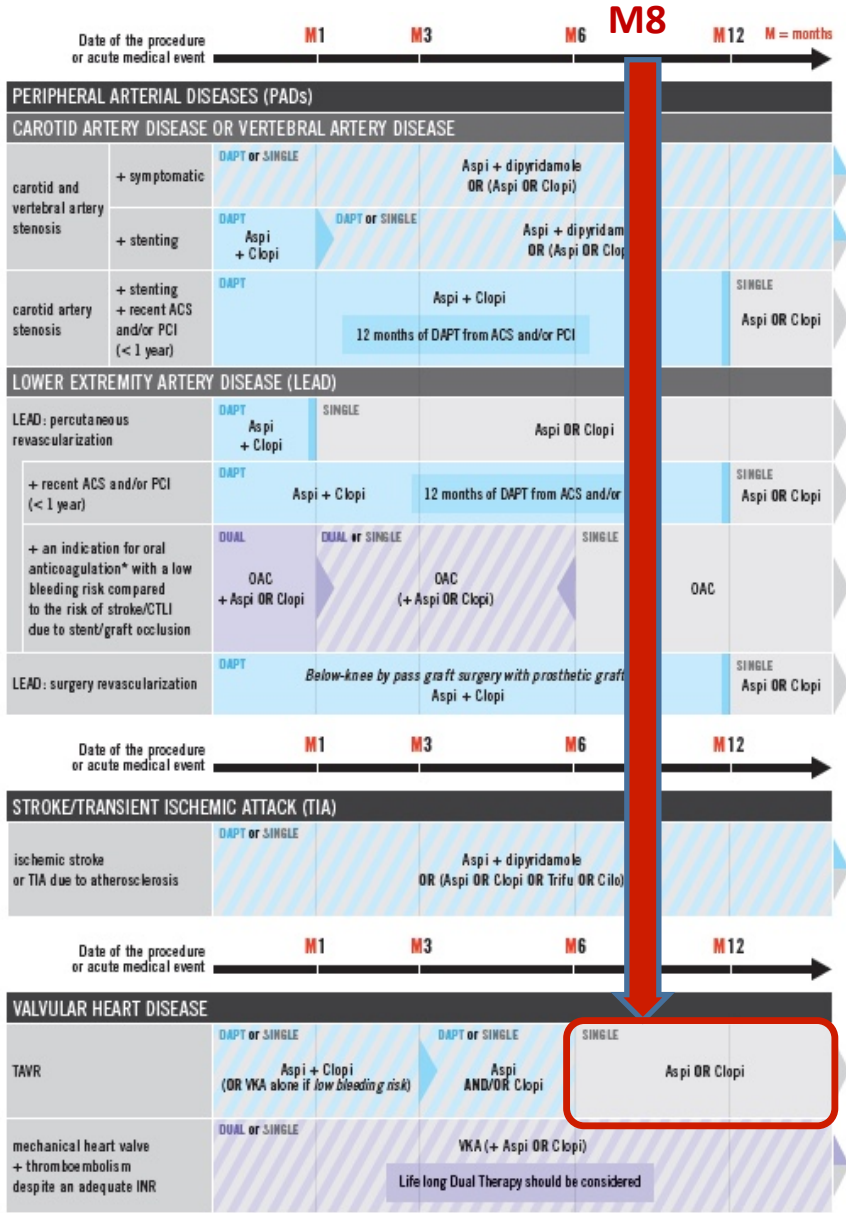

Long-term single antithrombotic therapy is recommended:  
 1) Aspirin  
 2) Clopidogrel

3- In the recommended treatment, find out where your patient is currently (here: 8 months)

\* Indication for OAC: Mechanical heart valve prosthesis, NV-AF or flutter with CHA2DS2-VASc score ≥ 2 for men and ≥ 3 for female. Oral anticoagulation therapy to prevent thromboembolism should be considered in male AF patients with a CHA2DS2-VASc score of 1 and in female AF patients with a CHA2DS2-VASc score of 2. For VTE disease, OAC should be continued for 3 months after the last event, but in certain situations, it may be extended to 6 months associated with a pathology at risk.

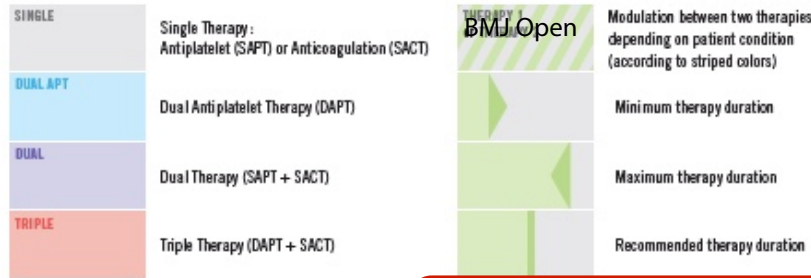

**Dosage of antithrombotic drugs**

Aspirin: 75-100 mg/day  
 Aspirin/dipyridamole: 25/200 mg twice a day  
 Cilostazol: 100 mg twice a day  
 Clopidogrel: 75 mg/day  
 Prasugrel: 10 mg/day to 5 mg/day in patients with body weight < 60 kg  
 Ticagrelor: 90 mg twice a day  
 Triflusal: 600 mg/day  
 VKA: target INR 2-3 for NV-AF, VTE; LV thrombus  
 Rivaroxaban (Xarelto):  
 • Venous thrombo-embolism (venous thrombosis/pulmonary embolism): D1 to D21: 15 mg x 2/day then from D22 onwards: 20 mg/day in a single take  
 • For the prevention of embolic stroke in patients with NV-AF: 20 mg/day in a single take  
 • No adjustment on weight, age, sex  
 • Renal failure  
 - Contraindication with creatinine clearance < 15 ml/min  
 - With creatinine clearance between 15-49 ml/min:  
 § NV-AF: 15 mg/day  
 § Venous thrombo-embolism: 15 mg x 2/day during the first three weeks then 20 mg/day in a single take  
 - No adjustment beyond a creatinine clearance > 50 ml/min  
 Apixaban (Eliquis):  
 • For the prevention of embolic stroke in patients with NV-AF:  
 - 5 mg x 2/day  
 - NV-AF and at least two of the following: age ≥ 80 yo, weight ≤ 60 kg, serum creatinine ≥ 133 micromol/L; 2,5 mg x 2/day  
 - With creatinine clearance between 15-29 ml/min: 2,5 mg x 2/day  
 - Contraindication with creatinine clearance < 15 ml/min  
 • Venous thrombo-embolism (venous thrombosis/pulmonary embolism): D1 to D7: 10 mg x 2/day then from D8 onwards: 5 mg x 2/day  
 Dabigatran (Pradaxa):  
 • For the prevention of embolic stroke in patients with NV-AF or VTE treatment, after treatment with a parenteral anticoagulant for at least 5 days: 150 mg x 2/day  
 • 110 mg x 2/day if:  
 § > 80 yo  
 § Patients also treated with Verapamil  
 § clearance between 30-50 ml/min  
 • Contraindication with creatinine clearance < 30 ml/min

- 1) Aspirin 75-100 mg/day
- 2) OR Clopidogrel 75 mg/day

**Abbreviations**

|              |                                                                                                                                                                                                                                |
|--------------|--------------------------------------------------------------------------------------------------------------------------------------------------------------------------------------------------------------------------------|
| ACS          | Acute Coronary Syndrome                                                                                                                                                                                                        |
| Aspi         | Aspirin                                                                                                                                                                                                                        |
| BMS          | Bare-Metal Stent                                                                                                                                                                                                               |
| CABG         | Coronary Artery Bypass Graft                                                                                                                                                                                                   |
| CHA2DS2-VASc | C Congestive Heart failure (1)<br>H Hypertension (1) A2 Age ≥ 75 (2)<br>D Diabetes Mellitus (1) S2 Prior stroke or TIA thromboembolism (2)<br>V Vascular disease (1) A Age 65-74 (1)<br>Sc Sex category (i.e.: female sex) (1) |
| Cilo         | Cilostazol                                                                                                                                                                                                                     |
| Clopi        | Clopidogrel                                                                                                                                                                                                                    |
| CTLI         | Chronic Limb-Threatening Ischemia                                                                                                                                                                                              |
| DAPT         | Dual Antiplatelet Therapy                                                                                                                                                                                                      |
| DCB          | Drug-Coated Balloon                                                                                                                                                                                                            |
| DES          | Drug-Eluting Stent                                                                                                                                                                                                             |
| DOA          | Direct Oral Anticoagulant                                                                                                                                                                                                      |
| DUAL         | Dual Therapy: SAPT + SACT                                                                                                                                                                                                      |
| INR          | International Normalized Ratio                                                                                                                                                                                                 |
| LEAD         | Lower Extremity Artery Disease                                                                                                                                                                                                 |
| LV           | Left Ventricular                                                                                                                                                                                                               |
| NSTEMI-ACS   | Non-ST Elevation Acute Coronary Syndrome                                                                                                                                                                                       |
| NV-AF        | Non-valvular atrial fibrillation                                                                                                                                                                                               |
| OAC          | Oral Anticoagulant: VKA or DOA                                                                                                                                                                                                 |
| PCI          | Percutaneous coronary intervention (=DES, BMS or DCB)                                                                                                                                                                          |
| Prasu        | Prasugrel                                                                                                                                                                                                                      |
| SAPT         | Single Antiplatelet Therapy                                                                                                                                                                                                    |
| SACT         | Single Anticoagulation Therapy                                                                                                                                                                                                 |
| SCAD         | Stable coronary artery disease                                                                                                                                                                                                 |
| STEMI        | ST-Elevation Myocardial Infarction                                                                                                                                                                                             |
| TAVR         | Transcatheter Aortic Valve Replacement                                                                                                                                                                                         |
| TIA          | Transient Ischemic Attack                                                                                                                                                                                                      |
| Tica         | Ticagrelor                                                                                                                                                                                                                     |
| Triflu       | Triflusal                                                                                                                                                                                                                      |
| TRIPLE       | Triple Therapy: DAPT + SACT                                                                                                                                                                                                    |
| VKA          | Vitamin K Antagonist Transcatheter Aortic Valve                                                                                                                                                                                |
| VTE          | Venous Thromboembolism                                                                                                                                                                                                         |

| TARGET INR FOR MECHANICAL PROSTHESE | Patient-related risk factor* |     |
|-------------------------------------|------------------------------|-----|
| Prosthesis thrombogenicity          | None                         | ≥ 1 |
| Low <sup>b</sup>                    | 2.5                          | 3.0 |
| Medium <sup>c</sup>                 | 3.0                          | 3.5 |
| High <sup>d</sup>                   | 3.5                          | 4.0 |

INR = international normalized ratio; LVEF = left ventricular ejection fraction  
 \* Mitral or tricuspid valve replacement, previous thromboembolism; atrial fibrillation, mitral stenosis of any degree, LVEF < 35%  
<sup>b</sup> Carbomedics, Medtronic Hall, ATS, Medtronic Open-Pivot, St-Jude Medical, On-X, Sorin Bicarbon  
<sup>c</sup> Other bileaflet valve with insufficient data  
<sup>d</sup> Lillehei-Kaster, Omniscience, Starr-Edwards (ball-cage), Bjork Shiley and other tilting-disc valves

IF BLEEDING DURING DAPT, follow these recommendations (figure 10):  
<https://www.esdri.nl/onderzoek/onderzoek/Praktische-Guidelines/2019/updates/updates-on-dual-antiplatelet-therapy/about/guidelines.xhtml>

SPECIFIC CONDITIONS REQUIRING SYSTEMATICALLY AN IN-HOSPITAL SPECIALIST HAVE BEEN EXCLUDED: cancer, auto-immune disease, hemophilia, human immunodeficiency virus (HIV), pediatrics and pregnancy and in-hospital prescriptions (including bridging therapy, perioperative therapy, and treatment of acute phase of cardiovascular event)

1  
2  
3  
4  
5  
6  
7  
8  
9  
10  
11  
12  
13  
14  
15  
16  
17  
18  
19  
20  
21  
22  
23  
24  
25  
26  
27  
28  
29  
30  
31  
32  
33  
34  
35  
36  
37  
38  
39  
40  
41

4- Check the recommended dosage for the drugs you want to prescribe

CLINICAL SITUATIONS NOT FOUND IN THIS TOOL NEED A SPECIALIST'S OPINION

1  
2  
3  
4  
5  
6  
7  
8  
9  
10  
11  
12  
13  
14  
15  
16  
17  
18  
19  
20  
21  
22  
23  
24  
25  
26  
27  
28  
29  
30  
31  
32  
33  
34  
35  
36  
37  
38  
39  
40  
41

# In practice

## Example 2: two cardiovascular diseases

- At your medical consultation, you meet Mr V, 55 years old (weight: 81 kg, body mass index: 24 kg/m<sup>2</sup>).
- Medical history: arterial hypertension, diabetes, renal failure (creatinine clearance with Cockcroft formula: 30 ml/min) and permanent non-valvular atrial fibrillation
- He had an acute coronary syndrome 5 months ago with a percutaneous coronary intervention (PCI)
- Which antithrombotic therapy is recommended in this clinical situation?

1- Locate in the chapter headings of the tool, the cardiovascular disease of your patient

| ACUTE/RECENT CORONARY SYNDROMES (ACS)                                                                                                                                     |                                                                                                                                                                           |                               |                                                  |                               |                |
|---------------------------------------------------------------------------------------------------------------------------------------------------------------------------|---------------------------------------------------------------------------------------------------------------------------------------------------------------------------|-------------------------------|--------------------------------------------------|-------------------------------|----------------|
| NSTE-ACS or STEMI                                                                                                                                                         |                                                                                                                                                                           |                               |                                                  |                               |                |
| medically managed                                                                                                                                                         | DAPT                                                                                                                                                                      | Aspi + Tica OR Clopi          |                                                  |                               | SINGLE         |
|                                                                                                                                                                           | DAPT can be extended up to 3 years in high ischaemic-risk patients who have tolerated DAPT without a bleeding complication                                                |                               |                                                  |                               | Aspi           |
| + an indication for oral anticoagulation*                                                                                                                                 | DUAL                                                                                                                                                                      | OAC + Aspi OR Clopi           |                                                  |                               | SINGLE<br>OAC  |
| with PCI (DES, BMS, or DCB)                                                                                                                                               | DAPT                                                                                                                                                                      | Aspi + Prasu OR Tica OR Clopi |                                                  |                               | MONO<br>Aspi   |
|                                                                                                                                                                           | DAPT can be extended up to 3 years in high ischaemic-risk patients who have tolerated DAPT without a bleeding complication or shortened to 6 months if high bleeding risk |                               |                                                  |                               |                |
| + an indication for oral anticoagulation*                                                                                                                                 | TRIPLE                                                                                                                                                                    | TRIPLE or DUAL                | DUAL                                             | SINGLE                        |                |
|                                                                                                                                                                           | OAC + Aspi + Clopi                                                                                                                                                        | OAC + Aspi AND/OR Clopi       | OAC + Aspi OR Clopi                              | OAC                           |                |
| Dual therapy with OAC and clopidogrel should be considered as an alternative to 1-month triple therapy in patients in whom the bleeding risk outweighs the ischemic risk  |                                                                                                                                                                           |                               |                                                  |                               |                |
| with CABG                                                                                                                                                                 | DAPT                                                                                                                                                                      | Aspi + Prasu OR Tica OR Clopi |                                                  |                               | SINGLE<br>Aspi |
|                                                                                                                                                                           | DAPT can be shortened to 6 months if very high bleeding risk                                                                                                              |                               |                                                  |                               |                |
| + an indication for oral anticoagulation*                                                                                                                                 | DUAL                                                                                                                                                                      | OAC + Aspi OR Clopi           |                                                  |                               | SINGLE<br>OAC  |
| STEMI                                                                                                                                                                     |                                                                                                                                                                           |                               |                                                  |                               |                |
| with fibrinolytic therapy                                                                                                                                                 | DAPT                                                                                                                                                                      | DAPT or SINGLE                | Aspi (+ Clopi)                                   | SINGLE                        |                |
|                                                                                                                                                                           | Aspi + Clopi                                                                                                                                                              |                               |                                                  | Aspi                          |                |
| + PCI (DES, BMS or DCB)                                                                                                                                                   | DAPT                                                                                                                                                                      | Aspi + Clopi                  |                                                  |                               | SINGLE<br>Aspi |
| DAPT can be extended up to 3 years in high ischaemic-risk patients who have tolerated DAPT without a bleeding complication or shortened to 6 months if high bleeding risk |                                                                                                                                                                           |                               |                                                  |                               |                |
| with LV thrombus or high risk of LV thrombus**                                                                                                                            | DUAL                                                                                                                                                                      | VKA + Aspi OR Clopi           | DAPT                                             | Aspi + Prasu OR Tica OR Clopi | SINGLE<br>Aspi |
|                                                                                                                                                                           | TRIPLE                                                                                                                                                                    | VKA + Aspi + Clopi            | TRIPLE or DUAL DAPT                              | DAPT                          | SINGLE<br>Aspi |
| + PCI (DES, BMS or DCB)                                                                                                                                                   |                                                                                                                                                                           |                               | Aspi + (VKA + Clopi) OR (Prasu OR Tica OR Clopi) | Aspi + Prasu OR Tica OR Clopi |                |

\*Indication for OAC: Mechanical heart valve prosthesis, NV-AF or flutter with CHA2DS2-VASc score ≥ 2 for men and ≥ 3 for female. Oral anticoagulation therapy to prevent thromboembolism should be considered in male AF patients with a CHA2DS2-VASc score of 1 and in female AF patients with a CHA2DS2-VASc score of 2. For VTE disease, OAC should be continued for 3 months if there is a triggering factor, 3 to 6 months if it is idiopathic, and for long-term if it is recurrent or associated with a pathology at risk.

\*\*High risk for LV thrombus: Ejection Fraction < 40%, Anteroapical wall motion abnormality.

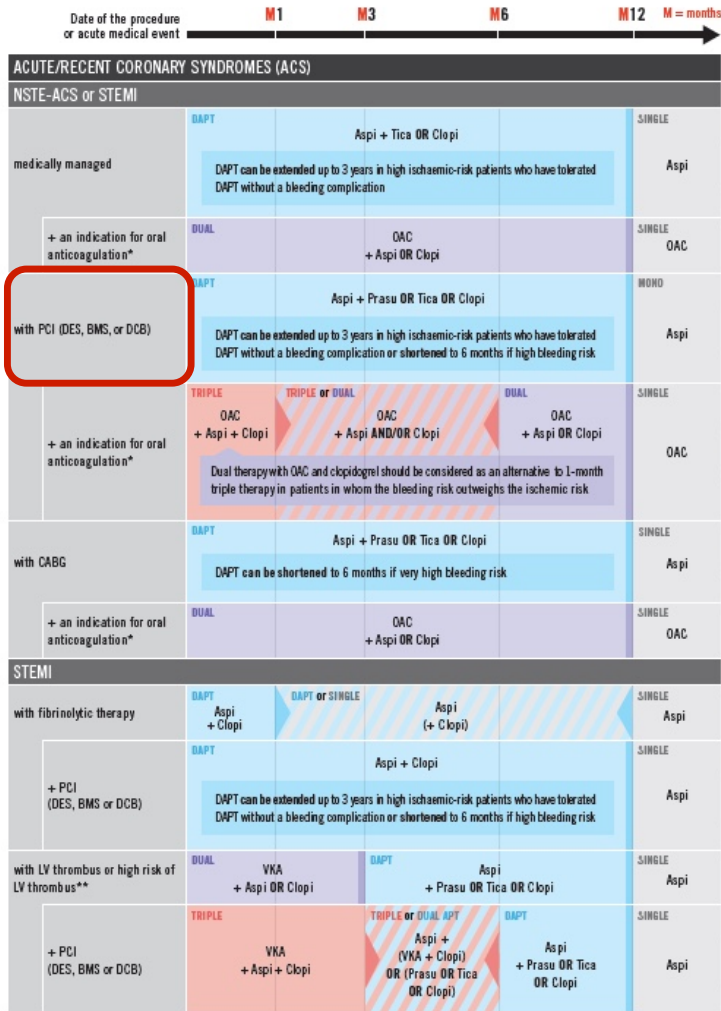

\* Indication for OAC: Mechanical heart valve prosthesis, NV-AF or flutter with CHA2DS2-VASc score  $\geq 2$  for men and  $\geq 3$  for female. Oral anticoagulation therapy to prevent thromboembolism should be considered in male AF patients with a CHA2DS2-VASc score of 1 and in female AF patients with a CHA2DS2-VASc score of 2. For VTE disease, OAC should be continued for 3 months if there is a triggering factor, 3 to 6 months if it is idiopathic, and for long-term if it is recurrent or associated with a pathology at risk.

\*\* High risk for LV thrombus: Ejection Fraction < 40%, Anteroapical wall motion abnormality.

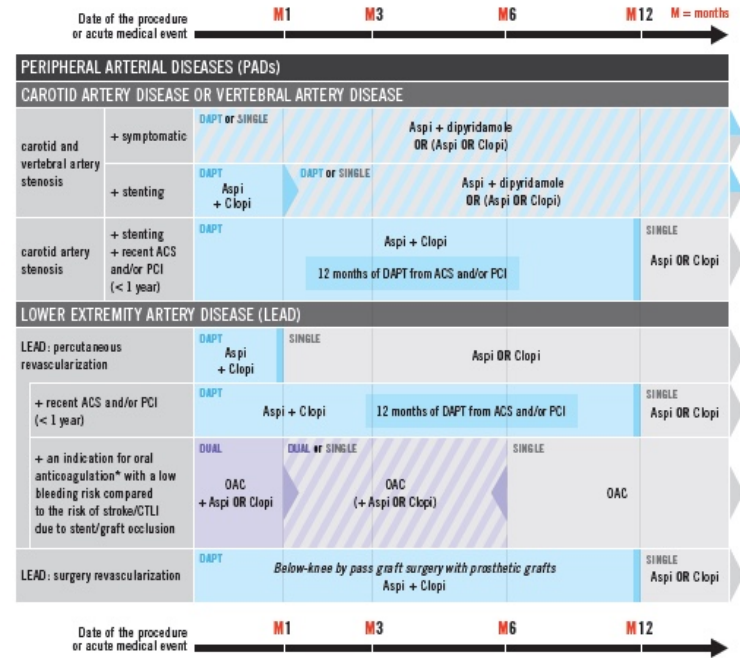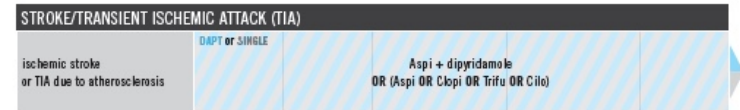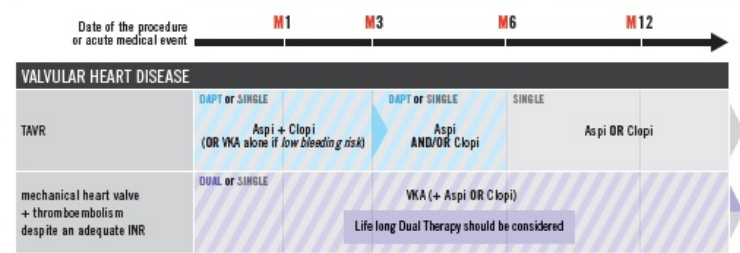

\* Indication for OAC: Mechanical heart valve prosthesis, NV-AF or flutter with CHA2DS2-VASc score  $\geq 2$  for men and  $\geq 3$  for female. Oral anticoagulation therapy to prevent thromboembolism should be considered in male AF patients with a CHA2DS2-VASc score of 1 and in female AF patients with a CHA2DS2-VASc score of 2. For VTE disease, OAC should be continued for 3 months if there is a triggering factor, 3 to 6 months if it is idiopathic, and for long-term if it is recurrent or associated with a pathology at risk.

2- Locate the precise clinical situation of your patient (treatment already performed, associated pathologies etc.)



1  
2  
3  
4  
5  
6  
7  
8  
9  
10  
11  
12  
13  
14  
15  
16  
17  
18  
19  
20  
21  
22  
23  
24  
25  
26  
27  
28  
29  
30  
31  
32  
33  
34  
35  
36  
37  
38  
39  
40  
41

**2bis- Locate the precise clinical situation of your patient (treatment already performed, associated pathologies etc.)**

|                                                |  | Date of the procedure or acute medical event →                                                                                                                            |                               |                                                  |                                                                                                                                                                          |            |
|------------------------------------------------|--|---------------------------------------------------------------------------------------------------------------------------------------------------------------------------|-------------------------------|--------------------------------------------------|--------------------------------------------------------------------------------------------------------------------------------------------------------------------------|------------|
|                                                |  | M1                                                                                                                                                                        | M3                            | M6                                               | M12                                                                                                                                                                      | M = months |
| <b>ACUTE/RECENT CORONARY SYNDROMES (ACS)</b>   |  |                                                                                                                                                                           |                               |                                                  |                                                                                                                                                                          |            |
| <b>NSTE-ACS or STEMI</b>                       |  |                                                                                                                                                                           |                               |                                                  |                                                                                                                                                                          |            |
| medically managed                              |  | DAPT                                                                                                                                                                      | Aspi + Tica OR Clopi          |                                                  |                                                                                                                                                                          | SINGLE     |
|                                                |  | DAPT can be extended up to 3 years in high ischaemic-risk patients who have tolerated DAPT without a bleeding complication                                                |                               |                                                  |                                                                                                                                                                          | Aspi       |
| + an indication for oral anticoagulation*      |  | DUAL                                                                                                                                                                      | OAC + Aspi OR Clopi           |                                                  |                                                                                                                                                                          | SINGLE     |
|                                                |  |                                                                                                                                                                           |                               |                                                  |                                                                                                                                                                          | OAC        |
| with PCI (DES, BMS, or DCB)                    |  | DAPT                                                                                                                                                                      | Aspi + Prasu OR Tica OR Clopi |                                                  |                                                                                                                                                                          | MONO       |
|                                                |  | DAPT can be extended up to 3 years in high ischaemic-risk patients who have tolerated DAPT without a bleeding complication or shortened to 6 months if high bleeding risk |                               |                                                  |                                                                                                                                                                          | Aspi       |
| + an indication for oral anticoagulation*      |  | TRIPLE                                                                                                                                                                    | TRIPLE or DUAL                | DUAL                                             |                                                                                                                                                                          | SINGLE     |
|                                                |  | OAC + Aspi + Clopi                                                                                                                                                        | OAC + Aspi AND/OR Clopi       | OAC + Aspi OR Clopi                              | Dual therapy with OAC and clopidogrel should be considered as an alternative to 1-month triple therapy in patients in whom the bleeding risk outweighs the ischemic risk |            |
| with CABG                                      |  | DAPT                                                                                                                                                                      | Aspi + Prasu OR Tica OR Clopi |                                                  |                                                                                                                                                                          | SINGLE     |
|                                                |  | DAPT can be shortened to 6 months if very high bleeding risk                                                                                                              |                               |                                                  |                                                                                                                                                                          | Aspi       |
| + an indication for oral anticoagulation*      |  | DUAL                                                                                                                                                                      | OAC + Aspi OR Clopi           |                                                  |                                                                                                                                                                          | SINGLE     |
|                                                |  |                                                                                                                                                                           |                               |                                                  |                                                                                                                                                                          | OAC        |
| <b>STEMI</b>                                   |  |                                                                                                                                                                           |                               |                                                  |                                                                                                                                                                          |            |
| with fibrinolytic therapy                      |  | DAPT                                                                                                                                                                      | DAPT or SINGLE                | Aspi (+ Clopi)                                   |                                                                                                                                                                          | SINGLE     |
|                                                |  | Aspi + Clopi                                                                                                                                                              |                               |                                                  | Aspi                                                                                                                                                                     |            |
| + PCI (DES, BMS or DCB)                        |  | DAPT                                                                                                                                                                      | Aspi + Clopi                  |                                                  |                                                                                                                                                                          | SINGLE     |
|                                                |  | DAPT can be extended up to 3 years in high ischaemic-risk patients who have tolerated DAPT without a bleeding complication or shortened to 6 months if high bleeding risk |                               |                                                  |                                                                                                                                                                          | Aspi       |
| with LV thrombus or high risk of LV thrombus** |  | DUAL                                                                                                                                                                      | VKA + Aspi OR Clopi           | DAPT                                             | Aspi + Prasu OR Tica OR Clopi                                                                                                                                            | SINGLE     |
|                                                |  |                                                                                                                                                                           |                               |                                                  | Aspi                                                                                                                                                                     |            |
| + PCI (DES, BMS or DCB)                        |  | TRIPLE                                                                                                                                                                    | VKA + Aspi + Clopi            | TRIPLE or DUAL DAPT                              | DAPT                                                                                                                                                                     | SINGLE     |
|                                                |  |                                                                                                                                                                           |                               | Aspi + (VKA + Clopi) OR (Prasu OR Tica OR Clopi) | Aspi + Prasu OR Tica OR Clopi                                                                                                                                            |            |

### CHA2DS2-VASc score?

#### Abbreviations

- ACS Acute Coronary Syndrome
- Aspi Aspirin
- BMS Bare-Metal Stent
- CABG Coronary Artery By Pass Graft
- CHA2DS2-VASc C Congestive Heart failure (1)
- H Hypertension (1) A2 Age ≥ 75 (2)
- D Diabetes Mellitus (1) S2 Prior stroke or TIA/Thromboembolism (2)
- V Vascular disease (1) A Age 65-74 (1)
- Sc Sex category (i.e.: female sex) (1)

**Hypertension and diabetes = 2 points → Indication for oral anticoagulation**

**\* Indication for OAC: Mechanical heart valve prosthesis, NV-AF or flutter with CHA2DS2-VASc score ≥ 2 for men and ≥ 3 for female.**

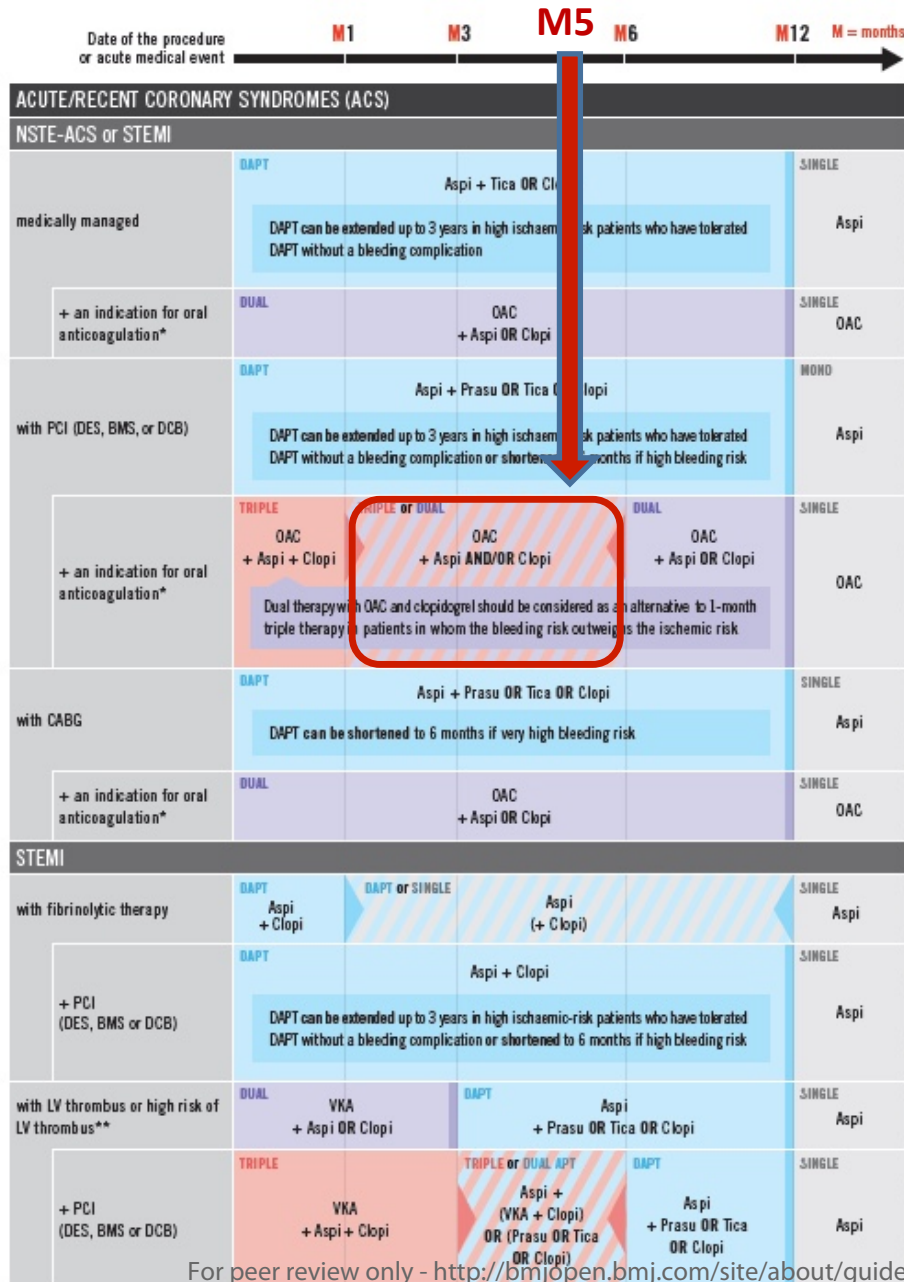

3- In the recommended treatment, find out where your patient is currently (here: 5 months)

Here, two options are possible according to the ischemic and bleeding risk of your patient:

- 1) Dual therapy: OAC + Aspirin OR Clopidogrel up to 12 months (so for another 7 months)
- 2) Triple therapy: OAC + Aspirin + Clopidogrel up to 6 months (so for another 1 month) and then a dual therapy with OAC + Aspirin OR Clopidogrel up to 12 months (so for another 6 months)

1  
2  
3  
4  
5  
6  
7  
8  
9  
10  
11  
12  
13  
14  
15  
16  
17  
18  
19  
20  
21  
22  
23  
24  
25  
26  
27  
28  
29  
30  
31  
32  
33  
34  
35  
36  
37  
38  
39  
40  
41

4- Check the recommended dosage for the drugs you want to prescribe

CLINICAL SITUATIONS NOT FOUND IN THIS TOOL NEED A SPECIALIST'S OPINION

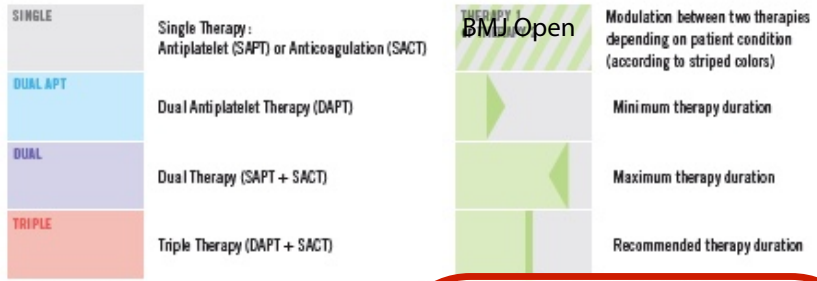

**Abbreviations**

|                     |                                                                    |
|---------------------|--------------------------------------------------------------------|
| <b>ACS</b>          | Acute Coronary Syndrome                                            |
| <b>Aspi</b>         | Aspirin                                                            |
| <b>BMS</b>          | Bare-Metal Stent                                                   |
| <b>CABG</b>         | Coronary Artery By Pass Graft                                      |
| <b>CHA2DS2-VASc</b> | C Congestive Heart failure (1)                                     |
|                     | H Hypertension (1) A2 Age ≥ 75 (2)                                 |
|                     | D Diabetes Mellitus (1) S2 Prior stroke or TIA thromboembolism (2) |
|                     | V Vascular disease (1) A Age 65-74 (1)                             |
|                     | Sc Sex category (i.e.: female sex) (1)                             |
| <b>Cilo</b>         | Cilostazol                                                         |
| <b>Clopi</b>        | Clopidogrel                                                        |
| <b>CTLI</b>         | Chronic Limb-Threatening Ischemia                                  |
| <b>DAPT</b>         | Dual Antiplatelet Therapy                                          |
| <b>DCB</b>          | Drug-Coated Balloon                                                |
| <b>DES</b>          | Drug-Eluting Stent                                                 |
| <b>DOA</b>          | Direct Oral Anticoagulant                                          |
| <b>DUAL</b>         | Dual Therapy: SAPT + SACT                                          |
| <b>INR</b>          | International Normalized Ratio                                     |
| <b>LEAD</b>         | Lower Extremity Artery Disease                                     |
| <b>LV</b>           | Left Ventricular                                                   |
| <b>NSTEMI-ACS</b>   | Non-ST Elevation Acute Coronary Syndrome                           |
| <b>NV-AF</b>        | Non-valvular atrial fibrillation                                   |
| <b>OAC</b>          | Oral Anticoagulant: VKA or DOA                                     |
| <b>PCI</b>          | Percutaneous coronary intervention (=DES, BMS or DCB)              |
| <b>Prasu</b>        | Prasugrel                                                          |
| <b>SAPT</b>         | Single Antiplatelet Therapy                                        |
| <b>SACT</b>         | Single Anticoagulation Therapy                                     |
| <b>SCAD</b>         | Stable coronary artery disease                                     |
| <b>STEMI</b>        | ST-Elevation Myocardial Infarction                                 |
| <b>TAVR</b>         | Transcatheter Aortic Valve Replacement                             |
| <b>TIA</b>          | Transient Ischemic Attack                                          |
| <b>Tica</b>         | Ticagrelor                                                         |
| <b>Trifu</b>        | Triflusal                                                          |
| <b>TRIPLE</b>       | Triple Therapy: DAPT + SACT                                        |
| <b>VKA</b>          | Vitamin K Antagonist Transcatheter Aortic Valve                    |
| <b>VTE</b>          | Venous Thromboembolism                                             |

| TARGET INR FOR MECHANICAL PROSTHESE | Patient-related risk factor |     |
|-------------------------------------|-----------------------------|-----|
| Prosthesis thrombogenicity          | None                        | ≥ 1 |
| Low <sup>a</sup>                    | 2.5                         | 3.0 |
| Medium <sup>b</sup>                 | 3.0                         | 3.5 |
| High <sup>d</sup>                   | 3.5                         | 4.0 |

INR = international normalized ratio; LVEF = left ventricular ejection fraction  
<sup>a</sup> Mitral or tricuspid valve replacement, previous thromboembolism, atrial fibrillation, mitral stenosis of any degree, LVEF < 35%  
<sup>b</sup> Carbomedics, Medtronic Hall, ATS, Medtronic Open-Pivot, St-Jude Medical, On-X, Sorin Bicarbon  
<sup>c</sup> Other bileaflet valve with insufficient data  
<sup>d</sup> Lillehei-Kaster, Omniscience, Starr-Edwards (ball-cage), Bjork Shiley and other tilting-disc valves

**Dosage of antithrombotic drugs**

**Aspirin**: 75-100 mg/day  
**Aspirin/dipyridamole**: 25/200 mg twice a day  
**Cilostazol**: 100 mg twice a day  
**Clopidogrel**: 75 mg/day  
**Prasugrel**: 10 mg/day (5 mg/day in patients with body weight < 60 kg)  
 Contraindications for prasugrel: previous intracranial haemorrhage, previous ischaemic stroke or transient ischaemic attack, or ongoing bleeds; prasugrel is not recommended for patients >75 years of age or with a body weight <60 kg.  
**Ticagrelor**: 90 mg twice a day  
 Contraindications for ticagrelor: previous intracranial haemorrhage or ongoing bleeds.  
**Triflusal**: 600 mg/day  
**VKA**: target INR 2-3 for NV-AF, VTE; LV thrombus  
**Rivaroxaban (Xarelto)**:  
 • Venous thrombo-embolism (venous thrombosis/pulmonary embolism): D1 to D21: 15 mg x 2/day then from D22 onwards: 20 mg/day in a single take  
 • For the prevention of embolic stroke in patients with NV-AF: 20 mg/day in a single take  
 • No adjustment on weight, age, sex  
 • Renal failure  
 - Contraindication with creatinine clearance < 15 ml/min  
 - With creatinine clearance between 15-49 ml/min:  
 § NV-AF: 15 mg/day  
 § Venous thrombo-embolism: 15 mg x 2/day during the first three weeks then 20 mg/day in a single take  
 - No adjustment beyond a creatinine clearance > 50 ml/min  
**Apixaban (Eliquis)**:  
 • For the prevention of embolic stroke in patients with NV-AF:  
 - 5 mg x 2/day  
 - NV-AF and at least two of the following: age ≥ 80 yo, weight ≤ 60 kg, serum creatinine ≥ 133 micromol/L; 2,5 mg x 2/day  
 - With creatinine clearance between 15-29 ml/min: 2,5 mg x 2/day  
 - Contraindication with creatinine clearance < 15 ml/min  
 • Venous thrombo-embolism (venous thrombosis/pulmonary embolism): D1 to D7: 10 mg x 2/day then from D8 onwards: 5 mg x 2/day  
**Dabigatran (Pradaxa)**:  
 • For the prevention of embolic stroke in patients with NV-AF or VTE treatment, after treatment with a parenteral anticoagulant for at least 5 days: 150 mg x 2/day  
 • 110 mg x 2/day if:  
 § > 80 yo  
 § Patients also treated with Verapamil  
 § clearance between 30-50 ml/min  
 • Contraindication with creatinine clearance < 30 ml/min

**THE COCKCROFT AND GALT FORMULA (1976)**  
 $C_{Cr} = \frac{((140 - \text{Age}) \times \text{Weight})}{(72 \times S_{Cr})} \times 0.85$  (if female)  
 $C_{Cr}$  (creatinine clearance) = mL/minute  
 Age = years Weight = kg  $S_{Cr}$  (serum creatinine) = mg/dL

**OAC :**

- VKA with a target INR: 2-3
- Rivaroxaban 15 mg/day
- Apixaban 5 mg X 2/day
- Dabigatran is contraindicated

**Antiplatelets:**

- Aspirin 75-100 mg/day
- Clopidogrel 75 mg/day

IF BLEEDING DURING DAPT, follow these recommendations (figure 10)  
<https://www.esdof.org/2019/06/06/2019-ESC-Guidelines-Oral-Antiplatelet-Therapy-DAPT/>  
<https://open.bmj.com/site/about/guidelines.xhtml>

**SPECIFIC CONDITIONS REQUIRING SYSTEMATICALLY AN IN-HOSPITAL SPECIALIST HAVE BEEN EXCLUDED:** cancer, auto-immune disease, hemophilia, human immunodeficiency virus (HIV), pediatrics and pregnancy and in-hospital prescriptions (including bridging therapy, perioperative therapy, and treatment of acute phase of cardiovascular event)

#### **Appendix 4: Example of a clinical vignette**

At your medical consultation, you meet Mr R, 86 years old (weight: 81 kg, body mass index: 24 kg/m<sup>2</sup>). Mr R is a widower, a smoker (10 cigarettes a day, 50 pack-years) and is autonomous in all daily activities. He has no personal medical history and he takes no drug. His last biological test did not find any abnormalities (serum creatinine value: 77 µM/L, creatinine clearance using the Cockcroft-Gault formula: 70 ml/min).

He comes to see you in consultation because for more than 1 week, he has had palpitations with exercise. You perform electrocardiogram (ECG) in your office and you diagnose non-valvular atrial fibrillation. The biological assessment is without particularity (in particular blood ionography and thyroid-stimulating hormone). Cardiac ultrasonography revealed a dilated left atrium with no valve abnormality.

##### **1) How many antithrombotic treatments will you prescribe during this consultation?**

- 0
- 1
- 2
- 3

##### **2) If you answered 0 to question 1, go to question 5. If not, which molecule(s) of antithrombotic(s) will you prescribe during this consultation?**

- Warfarin
- Rivaroxaban
- Apixaban
- Aspirin
- Clopidogrel

##### **3) Which dosage will you prescribe this(these) molecule(s)? (For each molecule checked on the previous question, it will appear:)**

- Warfarin:
  - INR (International Normalized Ratio): 2-3
  - INR (International Normalized Ratio): 2.5-3.5
- Rivaroxaban
  - 15 mg per day
  - 20 mg per day
- Apixaban
  - 2.5 mg twice a day
  - 5 mg twice a day
- Aspirin
  - 75-100 mg per day
  - 300 mg per day
- Clopidogrel
  - 75 mg per day
  - 300 mg per day

1  
2  
3 **4) How long does the antithrombotic treatment prescribed in the previous question need**  
4 **to be continued?**

- 5
- 6 • 1 month
  - 7 • 6 months
  - 8 • 12 months
  - 9 • For life
- 10

11 **5) On a scale of 0 to 10, what is your degree of confidence in the adequacy of your**  
12 **prescription in relation to the guidelines?**

13  
14  
15  
16 **For the experimental group, after completion of the 3 clinical vignettes:**

17  
18  
19 **Regarding the prescription support tool, please note the following items from 0 (strongly**  
20 **disagree) to 10 (strongly agree):**

- 21
- 22 • The prescription support-tool helped me answer to the clinical vignettes:../10
  - 23 • The prescription support-tool has modified the answers that I spontaneously made to
  - 24 clinical vignettes:../10
  - 25 • The prescription support-tool is clear:../10
  - 26 • The prescription support-tool is operational:../10
  - 27 • The prescription support-tool is useful for practice:../10
  - 28 • I would be ready to use this prescription support-tool:../10
  - 29 • I would recommend the use of this prescription support-tool:../10
- 30  
31  
32

33 **Notes on the tool: What are the points of the prescription support-tool that could be**  
34 **improved: useless information, missing information, presentation, etc:**

35  
36  
37  
38  
39  
40  
41  
42  
43  
44  
45  
46  
47  
48  
49  
50  
51  
52  
53  
54  
55  
56  
57  
58  
59  
60

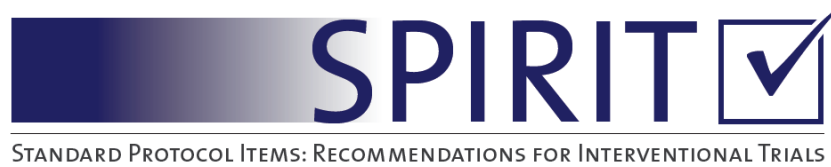

SPIRIT 2013 Checklist: Recommended items to address in a clinical trial protocol and related documents\*

| Section/item                      | Item No | Description                                                                                                                                                                                                                                                                              |
|-----------------------------------|---------|------------------------------------------------------------------------------------------------------------------------------------------------------------------------------------------------------------------------------------------------------------------------------------------|
| <b>Administrative information</b> |         |                                                                                                                                                                                                                                                                                          |
| Title                             | 1       | Descriptive title identifying the study design, population, interventions, and, if applicable, trial acronym<br>→ <b>Page 1</b>                                                                                                                                                          |
| Trial registration                | 2a      | Trial identifier and registry name. If not yet registered, name of intended registry<br>→ <b>Page 2 line 57</b>                                                                                                                                                                          |
|                                   | 2b      | All items from the World Health Organization Trial Registration Data Set                                                                                                                                                                                                                 |
| Protocol version                  | 3       | Date and version identifier<br>→ <b>line 244 - 248, page 11</b>                                                                                                                                                                                                                          |
| Funding                           | 4       | Sources and types of financial, material, and other support<br>→ <b>line 240, page 11</b>                                                                                                                                                                                                |
| Roles and responsibilities        | 5a      | Names, affiliations, and roles of protocol contributors<br>→ <b>Title page and lines 235 - 239 page 11</b>                                                                                                                                                                               |
|                                   | 5b      | Name and contact information for the trial sponsor                                                                                                                                                                                                                                       |
|                                   | 5c      | Role of study sponsor and funders, if any, in study design; collection, management, analysis, and interpretation of data; writing of the report; and the decision to submit the report for publication, including whether they will have ultimate authority over any of these activities |
|                                   | 5d      | Composition, roles, and responsibilities of the coordinating centre, steering committee, endpoint adjudication committee, data management team, and other individuals or groups overseeing the trial, if applicable (see Item 21a for data monitoring committee)                         |
| <b>Introduction</b>               |         |                                                                                                                                                                                                                                                                                          |
| Background and rationale          | 6a      | Description of research question and justification for undertaking the trial, including summary of relevant studies (published and unpublished) examining benefits and harms for each intervention<br>→ <b>Lines 72 – 101, page 4 - 5</b>                                                |
|                                   | 6b      | Explanation for choice of comparators                                                                                                                                                                                                                                                    |

|   |              |   |                                                                           |
|---|--------------|---|---------------------------------------------------------------------------|
| 1 |              |   |                                                                           |
| 2 | Objectives   | 7 | Specific objectives or hypotheses                                         |
| 3 |              |   | → <b>Lines 102 - 105, page 5</b>                                          |
| 4 |              |   |                                                                           |
| 5 | Trial design | 8 | Description of trial design including type of trial (eg, parallel group,  |
| 6 |              |   | crossover, factorial, single group), allocation ratio, and framework (eg, |
| 7 |              |   | superiority, equivalence, noninferiority, exploratory)                    |
| 8 |              |   |                                                                           |
| 9 |              |   |                                                                           |

### Methods: Participants, interventions, and outcomes

|    |                      |     |                                                                               |
|----|----------------------|-----|-------------------------------------------------------------------------------|
| 10 |                      |     |                                                                               |
| 11 |                      |     |                                                                               |
| 12 |                      |     |                                                                               |
| 13 | Study setting        | 9   | Description of study settings (eg, community clinic, academic hospital)       |
| 14 |                      |     | and list of countries where data will be collected. Reference to where        |
| 15 |                      |     | list of study sites can be obtained                                           |
| 16 |                      |     | → <b>Lines 109 - 110 page 5</b>                                               |
| 17 |                      |     |                                                                               |
| 18 |                      |     |                                                                               |
| 19 | Eligibility criteria | 10  | Inclusion and exclusion criteria for participants. If applicable, eligibility |
| 20 |                      |     | criteria for study centres and individuals who will perform the               |
| 21 |                      |     | interventions (eg, surgeons, psychotherapists)                                |
| 22 |                      |     | → <b>Lines 110 - 112 page 5</b>                                               |
| 23 |                      |     |                                                                               |
| 24 | Interventions        | 11a | Interventions for each group with sufficient detail to allow replication,     |
| 25 |                      |     | including how and when they will be administered                              |
| 26 |                      |     | → <b>Lines 113 - 121, page 5 - 6</b>                                          |
| 27 |                      |     |                                                                               |
| 28 |                      |     |                                                                               |
| 29 |                      | 11b | Criteria for discontinuing or modifying allocated interventions for a         |
| 30 |                      |     | given trial participant (eg, drug dose change in response to harms,           |
| 31 |                      |     | participant request, or improving/worsening disease)                          |
| 32 |                      |     |                                                                               |
| 33 |                      | 11c | Strategies to improve adherence to intervention protocols, and any            |
| 34 |                      |     | procedures for monitoring adherence (eg, drug tablet return,                  |
| 35 |                      |     | laboratory tests)                                                             |
| 36 |                      |     | → <b>Lines 143, page 6</b>                                                    |
| 37 |                      |     |                                                                               |
| 38 |                      |     |                                                                               |
| 39 |                      | 11d | Relevant concomitant care and interventions that are permitted or             |
| 40 |                      |     | prohibited during the trial                                                   |
| 41 |                      |     |                                                                               |
| 42 | Outcomes             | 12  | Primary, secondary, and other outcomes, including the specific                |
| 43 |                      |     | measurement variable (eg, systolic blood pressure), analysis metric           |
| 44 |                      |     | (eg, change from baseline, final value, time to event), method of             |
| 45 |                      |     | aggregation (eg, median, proportion), and time point for each                 |
| 46 |                      |     | outcome. Explanation of the clinical relevance of chosen efficacy and         |
| 47 |                      |     | harm outcomes is strongly recommended                                         |
| 48 |                      |     | → <b>Lines 144 - 153, page 7</b>                                              |
| 49 |                      |     |                                                                               |
| 50 |                      |     |                                                                               |
| 51 | Participant          | 13  | Time schedule of enrolment, interventions (including any run-ins and          |
| 52 | timeline             |     | washouts), assessments, and visits for participants. A schematic              |
| 53 |                      |     | diagram is highly recommended (see Figure)                                    |
| 54 |                      |     | → <b>Lines 113 - 143, page 5 - 6</b>                                          |
| 55 |                      |     |                                                                               |
| 56 |                      |     |                                                                               |
| 57 |                      |     |                                                                               |
| 58 |                      |     |                                                                               |
| 59 |                      |     |                                                                               |
| 60 |                      |     |                                                                               |

- 1  
2 Sample size 14 Estimated number of participants needed to achieve study objectives  
3 and how it was determined, including clinical and statistical  
4 assumptions supporting any sample size calculations  
5 → **Lines 196 – 198, page 9**  
6  
7 Recruitment 15 Strategies for achieving adequate participant enrolment to reach  
8 target sample size  
9 → **Lines 113 - 114 page 5**  
10  
11

## 12 **Methods: Assignment of interventions (for controlled trials)**

### 13 Allocation:

- 14  
15  
16 Sequence 16a Method of generating the allocation sequence (eg, computer-  
17 generation generated random numbers), and list of any factors for stratification.  
18 To reduce predictability of a random sequence, details of any planned  
19 restriction (eg, blocking) should be provided in a separate document  
20 that is unavailable to those who enrol participants or assign  
21 interventions  
22 **Lines 86 - 189 page 8**  
23  
24  
25 Allocation 16b Mechanism of implementing the allocation sequence (eg, central  
26 concealment telephone; sequentially numbered, opaque, sealed envelopes),  
27 mechanism describing any steps to conceal the sequence until interventions are  
28 assigned  
29 **Lines 86 - 189 page 8**  
30  
31  
32 Implementation 16c Who will generate the allocation sequence, who will enrol participants,  
33 and who will assign participants to interventions  
34 **Lines 86 - 189 page 8**  
35  
36  
37 Blinding 17a Who will be blinded after assignment to interventions (eg, trial  
38 (masking) participants, care providers, outcome assessors, data analysts), and  
39 how  
40  
41 17b If blinded, circumstances under which unblinding is permissible, and  
42 procedure for revealing a participant's allocated intervention during  
43 the trial  
44  
45

## 46 **Methods: Data collection, management, and analysis**

- 47  
48 Data collection 18a Plans for assessment and collection of outcome, baseline, and other  
49 methods trial data, including any related processes to promote data quality (eg,  
50 duplicate measurements, training of assessors) and a description of  
51 study instruments (eg, questionnaires, laboratory tests) along with  
52 their reliability and validity, if known. Reference to where data  
53 collection forms can be found, if not in the protocol  
54 → **Lines 190 – 194 page 8 - 9**  
55  
56  
57 18b Plans to promote participant retention and complete follow-up,  
58 including list of any outcome data to be collected for participants who  
59 discontinue or deviate from intervention protocols  
60



|    |                                 |     |                                                                               |
|----|---------------------------------|-----|-------------------------------------------------------------------------------|
| 1  |                                 |     |                                                                               |
| 2  | Data                            | 19  | Plans for data entry, coding, security, and storage, including any            |
| 3  | management                      |     | related processes to promote data quality (eg, double data entry;             |
| 4  |                                 |     | range checks for data values). Reference to where details of data             |
| 5  |                                 |     | management procedures can be found, if not in the protocol                    |
| 6  |                                 |     | → <b>Lines 190 – 194 page 8 - 9</b>                                           |
| 7  |                                 |     |                                                                               |
| 8  | Statistical                     | 20a | Statistical methods for analysing primary and secondary outcomes.             |
| 9  | methods                         |     | Reference to where other details of the statistical analysis plan can be      |
| 10 |                                 |     | found, if not in the protocol                                                 |
| 11 |                                 |     | → <b>Lines 202 - 205, page 9</b>                                              |
| 12 |                                 |     |                                                                               |
| 13 |                                 | 20b | Methods for any additional analyses (eg, subgroup and adjusted                |
| 14 |                                 |     | analyses)                                                                     |
| 15 |                                 | 20c | Definition of analysis population relating to protocol non-adherence          |
| 16 |                                 |     | (eg, as randomised analysis), and any statistical methods to handle           |
| 17 |                                 |     | missing data (eg, multiple imputation)                                        |
| 18 |                                 |     |                                                                               |
| 19 |                                 |     |                                                                               |
| 20 |                                 |     |                                                                               |
| 21 |                                 |     |                                                                               |
| 22 | <b>Methods: Monitoring</b>      |     |                                                                               |
| 23 |                                 |     |                                                                               |
| 24 | Data monitoring                 | 21a | Composition of data monitoring committee (DMC); summary of its role           |
| 25 |                                 |     | and reporting structure; statement of whether it is independent from          |
| 26 |                                 |     | the sponsor and competing interests; and reference to where further           |
| 27 |                                 |     | details about its charter can be found, if not in the protocol.               |
| 28 |                                 |     | Alternatively, an explanation of why a DMC is not needed                      |
| 29 |                                 | 21b | Description of any interim analyses and stopping guidelines, including        |
| 30 |                                 |     | who will have access to these interim results and make the final              |
| 31 |                                 |     | decision to terminate the trial                                               |
| 32 |                                 |     |                                                                               |
| 33 |                                 |     |                                                                               |
| 34 |                                 |     |                                                                               |
| 35 | Harms                           | 22  | Plans for collecting, assessing, reporting, and managing solicited and        |
| 36 |                                 |     | spontaneously reported adverse events and other unintended effects            |
| 37 |                                 |     | of trial interventions or trial conduct                                       |
| 38 |                                 |     |                                                                               |
| 39 |                                 |     |                                                                               |
| 40 | Auditing                        | 23  | Frequency and procedures for auditing trial conduct, if any, and              |
| 41 |                                 |     | whether the process will be independent from investigators and the            |
| 42 |                                 |     | sponsor                                                                       |
| 43 |                                 |     |                                                                               |
| 44 |                                 |     |                                                                               |
| 45 | <b>Ethics and dissemination</b> |     |                                                                               |
| 46 |                                 |     |                                                                               |
| 47 | Research ethics                 | 24  | Plans for seeking research ethics committee/institutional review board        |
| 48 | approval                        |     | (REC/IRB) approval                                                            |
| 49 |                                 |     | → <b>Lines 223 - 233 page 10</b>                                              |
| 50 |                                 |     |                                                                               |
| 51 | Protocol                        | 25  | Plans for communicating important protocol modifications (eg,                 |
| 52 | amendments                      |     | changes to eligibility criteria, outcomes, analyses) to relevant parties      |
| 53 |                                 |     | (eg, investigators, REC/IRBs, trial participants, trial registries, journals, |
| 54 |                                 |     | regulators)                                                                   |
| 55 |                                 |     |                                                                               |
| 56 |                                 |     |                                                                               |
| 57 | Consent or assent               | 26a | Who will obtain informed consent or assent from potential trial               |
| 58 |                                 |     | participants or authorised surrogates, and how (see Item 32)                  |
| 59 |                                 |     |                                                                               |
| 60 |                                 |     |                                                                               |

|    |                   |     |                                                                              |
|----|-------------------|-----|------------------------------------------------------------------------------|
| 1  |                   |     |                                                                              |
| 2  |                   | 26b | Additional consent provisions for collection and use of participant data     |
| 3  |                   |     | and biological specimens in ancillary studies, if applicable                 |
| 4  |                   |     |                                                                              |
| 5  | Confidentiality   | 27  | How personal information about potential and enrolled participants will      |
| 6  |                   |     | be collected, shared, and maintained in order to protect confidentiality     |
| 7  |                   |     | before, during, and after the trial                                          |
| 8  |                   |     | → <b>Lines 192 - 193, page 8 - 9</b>                                         |
| 9  |                   |     |                                                                              |
| 10 | Declaration of    | 28  | Financial and other competing interests for principal investigators for      |
| 11 | interests         |     | the overall trial and each study site                                        |
| 12 |                   |     | → <b>Line 241, page 11</b>                                                   |
| 13 |                   |     |                                                                              |
| 14 |                   |     |                                                                              |
| 15 | Access to data    | 29  | Statement of who will have access to the final trial dataset, and            |
| 16 |                   |     | disclosure of contractual agreements that limit such access for              |
| 17 |                   |     | investigators                                                                |
| 18 |                   |     |                                                                              |
| 19 | Ancillary and     | 30  | Provisions, if any, for ancillary and post-trial care, and for               |
| 20 | post-trial care   |     | compensation to those who suffer harm from trial participation               |
| 21 |                   |     |                                                                              |
| 22 |                   |     |                                                                              |
| 23 | Dissemination     | 31a | Plans for investigators and sponsor to communicate trial results to          |
| 24 | policy            |     | participants, healthcare professionals, the public, and other relevant       |
| 25 |                   |     | groups (eg, via publication, reporting in results databases, or other        |
| 26 |                   |     | data sharing arrangements), including any publication restrictions           |
| 27 |                   |     | → <b>Lines 232 - 233, page 10</b>                                            |
| 28 |                   |     |                                                                              |
| 29 |                   |     |                                                                              |
| 30 |                   | 31b | Authorship eligibility guidelines and any intended use of professional       |
| 31 |                   |     | writers                                                                      |
| 32 |                   |     |                                                                              |
| 33 |                   | 31c | Plans, if any, for granting public access to the full protocol, participant- |
| 34 |                   |     | level dataset, and statistical code                                          |
| 35 |                   |     |                                                                              |
| 36 |                   |     |                                                                              |
| 37 | <b>Appendices</b> |     |                                                                              |
| 38 |                   |     |                                                                              |
| 39 | Informed consent  | 32  | Model consent form and other related documentation given to                  |
| 40 | materials         |     | participants and authorised surrogates                                       |
| 41 |                   |     |                                                                              |
| 42 | Biological        | 33  | Plans for collection, laboratory evaluation, and storage of biological       |
| 43 | specimens         |     | specimens for genetic or molecular analysis in the current trial and for     |
| 44 |                   |     | future use in ancillary studies, if applicable                               |
| 45 |                   |     |                                                                              |

\*It is strongly recommended that this checklist be read in conjunction with the SPIRIT 2013 Explanation & Elaboration for important clarification on the items. Amendments to the protocol should be tracked and dated. The SPIRIT checklist is copyrighted by the SPIRIT Group under the Creative Commons "[Attribution-NonCommercial-NoDerivs 3.0 Unported](https://creativecommons.org/licenses/by-nc-nd/3.0/)" license.

# BMJ Open

## Evaluation of a prescription support-tool for chronic management of oral antithrombotic combinations in adults using clinical vignettes: protocol of a randomized controlled trial

|                                 |                                                                                                                                                                                                                                                                                                                                                                                                                                                                                                                                                                                                                                                                                                                                                                                                                                                                                                                                                                                                                                                                                                                                                                                                                                                                                                                                                                                                                                                                                                                                                                                                                                                                                                                                                                                                                                                                                                                                                                                                                                                                                                         |
|---------------------------------|---------------------------------------------------------------------------------------------------------------------------------------------------------------------------------------------------------------------------------------------------------------------------------------------------------------------------------------------------------------------------------------------------------------------------------------------------------------------------------------------------------------------------------------------------------------------------------------------------------------------------------------------------------------------------------------------------------------------------------------------------------------------------------------------------------------------------------------------------------------------------------------------------------------------------------------------------------------------------------------------------------------------------------------------------------------------------------------------------------------------------------------------------------------------------------------------------------------------------------------------------------------------------------------------------------------------------------------------------------------------------------------------------------------------------------------------------------------------------------------------------------------------------------------------------------------------------------------------------------------------------------------------------------------------------------------------------------------------------------------------------------------------------------------------------------------------------------------------------------------------------------------------------------------------------------------------------------------------------------------------------------------------------------------------------------------------------------------------------------|
| Journal:                        | <i>BMJ Open</i>                                                                                                                                                                                                                                                                                                                                                                                                                                                                                                                                                                                                                                                                                                                                                                                                                                                                                                                                                                                                                                                                                                                                                                                                                                                                                                                                                                                                                                                                                                                                                                                                                                                                                                                                                                                                                                                                                                                                                                                                                                                                                         |
| Manuscript ID                   | bmjopen-2018-025544.R2                                                                                                                                                                                                                                                                                                                                                                                                                                                                                                                                                                                                                                                                                                                                                                                                                                                                                                                                                                                                                                                                                                                                                                                                                                                                                                                                                                                                                                                                                                                                                                                                                                                                                                                                                                                                                                                                                                                                                                                                                                                                                  |
| Article Type:                   | Protocol                                                                                                                                                                                                                                                                                                                                                                                                                                                                                                                                                                                                                                                                                                                                                                                                                                                                                                                                                                                                                                                                                                                                                                                                                                                                                                                                                                                                                                                                                                                                                                                                                                                                                                                                                                                                                                                                                                                                                                                                                                                                                                |
| Date Submitted by the Author:   | 26-Mar-2019                                                                                                                                                                                                                                                                                                                                                                                                                                                                                                                                                                                                                                                                                                                                                                                                                                                                                                                                                                                                                                                                                                                                                                                                                                                                                                                                                                                                                                                                                                                                                                                                                                                                                                                                                                                                                                                                                                                                                                                                                                                                                             |
| Complete List of Authors:       | <p>ZERAH, Lorene; Sorbonne Université, INSERM, Institut Pierre Louis d'Epidémiologie et de Santé Publique<br/>         Bonnet-Zamponi, Dominique; Sorbonne Université, INSERM, Institut Pierre Louis d'Epidémiologie et de Santé Publique; Observatoire du Médicament des Dispositifs Médicaux et de l'Innovation Thérapeutique Ile de France, OMEDIT<br/>         Frappé, Paul; Institut de recherche en médecine générale; University of Saint-Etienne, Department of General Practice<br/>         Hauguel-Moreau, Marie; Sorbonne Université, AP-HP, Hôpitaux Universitaires Pitié-Salpêtrière – Charles Foix, Département de cardiologie<br/>         De Rycke, Yann; Sorbonne Université, INSERM, Institut Pierre Louis d'Epidémiologie et de Santé Publique; AP-HP, Hôpitaux Universitaires Pitié-Salpêtrière – Charles Foix, Département Biostatistique Santé Publique et Information Médicale, Centre de Pharmacoépidémiologie (Cephepi)<br/>         Magnier, Anne-Marie; Sorbonne Université, AP-HP, Hôpitaux Universitaires Pitié-Salpêtrière – Charles Foix, Département de médecine générale<br/>         Pautas, Eric; Sorbonne Université, AP-HP, Hôpitaux Universitaires Pitié-Salpêtrière – Charles Foix, Département de gériatrie<br/>         Charles, Pierre; Institut Mutualiste Montsouris, Médecine Interne<br/>         Collet, Jean-philippe; Sorbonne Université, AP-HP, Hôpitaux Universitaires Pitié-Salpêtrière – Charles Foix, Département de cardiologie<br/>         Dechartres, Agnes; Sorbonne Université, INSERM, Institut Pierre Louis d'Epidémiologie et de Santé Publique; APHP, Hôpitaux Universitaires Pitié-Salpêtrière – Charles Foix, Département Biostatistique Santé Publique et Information Médicale, Centre de Pharmacoépidémiologie (Cephepi)<br/>         Tubach, Florence; Sorbonne Université, INSERM, Institut Pierre Louis d'Epidémiologie et de Santé Publique; APHP, Hôpitaux Universitaires Pitié-Salpêtrière – Charles Foix, Département Biostatistique Santé Publique et Information Médicale, Centre de Pharmacoépidémiologie (Cephepi)</p> |
| <b>Primary Subject Heading</b>: | Pharmacology and therapeutics                                                                                                                                                                                                                                                                                                                                                                                                                                                                                                                                                                                                                                                                                                                                                                                                                                                                                                                                                                                                                                                                                                                                                                                                                                                                                                                                                                                                                                                                                                                                                                                                                                                                                                                                                                                                                                                                                                                                                                                                                                                                           |

1  
2  
3  
4  
5  
6  
7  
8  
9  
10  
11  
12  
13  
14  
15  
16  
17  
18  
19  
20  
21  
22  
23  
24  
25  
26  
27  
28  
29  
30  
31  
32  
33  
34  
35  
36  
37  
38  
39  
40  
41  
42  
43  
44  
45  
46  
47  
48  
49  
50  
51  
52  
53  
54  
55  
56  
57  
58  
59  
60

|                            |                                                                           |
|----------------------------|---------------------------------------------------------------------------|
| Secondary Subject Heading: | Cardiovascular medicine, Evidence based practice, Public health           |
| Keywords:                  | prescription support-tool, clinical vignettes, antithrombotic combination |
|                            |                                                                           |

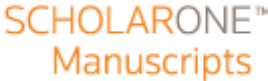

1  
2  
3 **Evaluation of a prescription support-tool for chronic management of oral**  
4 **antithrombotic combinations in adults using clinical vignettes: protocol of a randomized**  
5 **controlled trial**  
6  
7  
8  
9

10  
11  
12 Zerah L<sup>1</sup>, Bonnet-Zamponi D<sup>1,2</sup>, Frappé P<sup>3,4</sup>, Hauguel-Moreau M<sup>5</sup>, De Rycke Y<sup>1,6</sup>, Magnier  
13 AM<sup>7</sup>, Pautas E<sup>8</sup>, Charles P<sup>9</sup>, Collet JP<sup>5</sup>, Dechartres A<sup>1,6</sup>, Tubach F<sup>1,6</sup>  
14  
15

- 16 1. Sorbonne Université, INSERM, Institut Pierre Louis d'Epidémiologie et de Santé  
17 Publique, F-75013 Paris, France
- 18 2. Observatoire du Médicament des Dispositifs Médicaux et de l'Innovation Thérapeutique  
19 Ile de France (OMEDIT), Paris, France
- 20 3. Institut de recherche en médecine générale, Paris, France
- 21 4. Département de médecine générale, Université de Saint-Etienne, Saint-Etienne, France
- 22 5. Sorbonne Université, AP-HP, Hôpitaux Universitaires Pitié-Salpêtrière – Charles Foix,  
23 Département de Cardiologie, F-75013 Paris, France
- 24 6. AP-HP, Hôpitaux Universitaires Pitié-Salpêtrière – Charles Foix, Département  
25 Biostatistique Santé Publique et Information Médicale, Centre de Pharmacoépidémiologie  
26 (Cephepi), F-75013 Paris, France
- 27 7. Sorbonne Université, AP-HP, Hôpitaux Universitaires Pitié-Salpêtrière – Charles Foix,  
28 Département de Médecine Générale, F-75013 Paris, France
- 29 8. Sorbonne Université, AP-HP, Hôpitaux Universitaires Pitié-Salpêtrière – Charles Foix,  
30 Département de Gériatrie, F-75013 Paris, France
- 31 9. Institut Mutualiste Montsouris, Département de Médecine Interne, F-75014 Paris, France

32  
33  
34  
35  
36  
37  
38  
39  
40  
41  
42  
43  
44 **\* Corresponding author: Dr Lorene Zerah**

45 Correspondence to: [lorene.zerah@inserm.fr](mailto:lorene.zerah@inserm.fr)

46  
47 Address: Département Biostatistique Santé Publique et Information Médicale, Centre de  
48 Pharmacoépidémiologie (Cephepi), Hôpital Pitié-Salpêtrière 47 – 83 boulevard de l'hôpital,  
49 75013, Paris, France

50  
51  
52  
53  
54  
55  
56  
57  
58  
59  
60  
52  
53  
54  
55  
56  
57  
58  
59  
60  
Tel: +33 1 42 16 03 47

## ABSTRACT

**Introduction:** Improving the appropriateness of prescriptions of oral antithrombotic (AT) drugs, especially AT combinations, is crucial because these drugs are implicated in bleeding events. We developed a prescription support-tool synthesizing guidelines on chronic management of oral AT combinations. Our main objective is to assess the impact of this tool on improving the prescription of oral ATs to comply with guidelines.

**Methods and analysis:** A randomized controlled trial will be conducted among French general practitioners and cardiologists involved in outpatient settings. Physicians will be invited to participate to an online survey by email via physician associations, social networks or word of mouth. They will be randomized to two arms: the experimental arm (access to the prescription support-tool) or the control arm (no prescription support-tool). Then, all participants will be presented 3 different clinical vignettes illustrating outpatient clinical situations and will be asked to propose prescriptions for each vignette (number of ATs, type, duration and dosage of each AT). A computer-generated randomization scheme implemented in the online survey will be used to allocate physicians to the experimental or control arm, then stratified by medical specialty. The primary outcome will be fully appropriate prescription of oral ATs i.e that comply with the guidelines in terms of number of drugs, drug class, duration and dosage. To demonstrate a 5% increase in this proportion, we will need to include a minimum of 230 physicians per arm. A logistic mixed model with a clinical vignette-effect and a physician-effect nested in the arm of the study will be used.

**Ethics and dissemination:** The *Institutional Review Board* of Inserm (IRB00003888) approved our research project (no. 18-492). If the prescription support-tool improves the prescription of oral ATs, we will create an interactive web tool and will assess its impact in terms of clinical outcomes in real-life.

(ClinicalTrials.gov ID: NCT03630874)

### **Article summary: strengths and limitations of this study**

- Strengths:
  - This is a national, multicenter, randomized controlled study to evaluate the impact of a new and innovative prescription support-tool for chronic management of oral antithrombotic prescriptions (single, dual or triple therapy).
  - A scientific committee and an expert committee have developed and validated 30 clinical vignettes that we will use to evaluate the prescription support-tool.
- Limitations:
  - Selected physicians may not be representative of general practitioners or cardiologists because they are volunteers.
  - Non-access to the prescription support-tool in the control arm cannot be completely guaranteed (contamination bias).
  - The study will be undertaken in France, which could limit generalizability.

## INTRODUCTION

Antithrombotic (AT) drugs, which include antiplatelet (AP) and anticoagulant (AC) therapies, are used to prevent and treat many cardiovascular disorders.[1] With the increase in prevalence of cardiovascular diseases and medical progress, these treatments are increasingly being prescribed all around the world.[1] Furthermore, ATs are the most frequent drug class implicated in serious and fatal adverse drug events (ADEs), particularly bleeding events,[2,3] among which 70% could be preventable.[4]

AT combinations (dual or triple AT therapy) greatly increase this risk. For example, Hansen et al. reported a 3.1-fold higher risk of fatal and non-fatal bleeding with dual warfarin and clopidogrel therapy and a 3.7-fold higher risk with triple therapy (warfarin, aspirin and clopidogrel) than warfarin monotherapy in patients with non-valvular atrial fibrillation (NV-AF).[5] So far, no study has evaluated the rate of prescriptions of AT combinations not complying with guidelines for adults, taking into account the drugs prescribed but also the dosage and duration of the prescription. Although tools assessing inappropriate prescribing such as the Beers or STOPP/START criteria[6,7] have a section dedicated to ATs, they mention only a few conditions for prescribing AT combinations and are relevant to older people only. Only one Canadian cohort study was specifically designed to assess the appropriateness of AT combinations in adults.[8] It concluded that approximately 15% of patients with AT combinations had inappropriate dual or triple oral AT therapy. However, the appropriateness of the prescribing was limited to the type of drugs combined and did not cover duration and dosage.

To assess the appropriateness of prescribing AT combinations (considering number of drugs, type of drugs, dosage and duration at the same time) in a French cohort of adults, we performed a systematic review of international guidelines (2012-2018) to define which AT combination is recommended, when and for how long.[9] Guidelines dealing with oral AT



1  
2  
3 combinations were numerous (n=70) and none encompassed all the clinical situations  
4  
5 requiring oral AT combinations. This review highlighted the difficulty for a physician to  
6  
7 quickly find the most up-to-date recommendation and the one most relevant to the patient's  
8  
9 clinical situation. These findings agreed with clinical experience and led us to synthesize all  
10  
11 the recommendations into a prescription support-tool (**Figure 1**)[9] to help physicians  
12  
13 prescribe oral AT combinations.  
14  
15

16  
17 Our hypothesis is that this prescription support-tool would improve the prescription of oral  
18  
19 AT prescriptions to comply with guidelines. Our primary objective is to assess the impact of  
20  
21 this tool on improving the prescription of oral ATs to comply with guidelines (in terms of  
22  
23 number of drugs, drug class, duration and dosage at the same time).  
24  
25

## 26 27 28 **METHODS AND ANALYSIS**

### 29 30 **Study design, study setting and eligibility criteria**

31  
32 A web-based, open randomized controlled trial involving clinical vignettes will be performed  
33  
34 in France via an online survey. This study will be conducted among French general  
35  
36 practitioners and cardiologists involved in outpatient settings. Physicians with an exclusive  
37  
38 hospital practice will not be eligible.  
39  
40

41  
42 Physicians will be identified and contacted to participate in the online survey by email via  
43  
44 physician associations, social networks or word of mouth. The survey will gather  
45  
46 informations on physicians' characteristics, including age, sex, medical specialty (cardiologist  
47  
48 or general practitioner), place of exercise (hospital or ambulatory setting), years of medical  
49  
50 practice, approximate proportion of patients prescribed oral AT combinations in their practice  
51  
52 ( $\leq 5\%$ , 6 – 10%, 11-20% or  $\geq 21\%$ ), whether physicians feel comfortable or not with  
53  
54 management of oral AT prescriptions (totally, partially, rarely, never), and whether physicians  
55  
56 know where to find the most recent guidelines on oral AT prescriptions. Then, physicians will  
57  
58  
59  
60

1  
2  
3 be randomized to 2 arms: the experimental arm, having access to the prescription support-tool  
4 **(Figure 1),**[9] and the control arm, with no prescription support-tool. For physicians in the  
5  
6 **(Appendix 1),**[9] both downloaded (or just viewed) online in pdf format. Then, participants  
7  
8 from both arms will be presented 3 different clinical vignettes illustrating outpatient clinical  
9  
10 situations and will be asked to propose prescriptions for each clinical vignette (oral AT or not,  
11  
12 number of oral ATs, type, duration and dosage of each oral AT) by answering 4 multiple-  
13  
14 choice questions (each question on a separate web page). Question 5 will evaluate the degree  
15  
16 of confidence of physicians have that their prescription of ATs complies with guidelines on a  
17  
18 scale of 0 to 10. Physicians in the experimental arm will answer each question with the help  
19  
20 of the tool, downloadable (or viewable on each page). At the end, we will ask to physicians of  
21  
22 the experimental arm to rate, on a scale from 0 and 10, the usefulness of the prescription  
23  
24 support-tool, how much they would be willing to use this prescription support-tool in their  
25  
26 practice and if they would recommend its use. Physicians in the control arm will be asked to  
27  
28 answer according to their actual clinical practice as closely as possible. Once the answer is  
29  
30 given, physicians cannot go back or change their answer. Physicians must answer the  
31  
32 questions consecutively; however, they will be allowed to stop and continue at any time (on  
33  
34 the same computer). Physicians from the control arm will be able to download the  
35  
36 prescription support-tool once they have completed their answers for the 3 clinical vignettes.  
37  
38  
39 The scientific and expert committee have created and validated 30 clinical vignettes. To  
40  
41 ensure that each clinical vignette will be read the same number of times in both arms, we  
42  
43 created 2 randomized lists of clinical vignettes in blocks of 30 (one list per trial arm). Clinical  
44  
45 vignettes will then be allocated consecutively 3 by 3 to each physician, according to the arm  
46  
47 in which he/she was randomized. Therefore, in each arm, for every 10 physicians randomized,  
48  
49 all clinical vignettes will be read once. The randomization unit will be the physician and the  
50  
51  
52  
53  
54  
55  
56  
57  
58  
59  
60

1  
2  
3 unit of analysis the clinical vignette. Three clinical vignettes per physician was a middle  
4  
5 ground to ensure the feasibility of the study considering both participants' availability  
6  
7 (acceptable time to complete the clinical vignettes) and statistical need (number of clinical  
8  
9 vignettes needed). To maximize the participation rate, physicians will be sent reminders every  
10  
11  
12 20 days.

### 13 14 **Outcomes**

15  
16 The primary outcome is prescription of oral ATs that comply with guidelines in terms of  
17  
18 number of drugs, drug class, duration and dosage at the same time, which will be termed fully  
19  
20 appropriate prescription. An expert committee will determine the correct answer, based on the  
21  
22 prescription support-tool (**Figure 1**)[9]. Secondary outcomes are (1) prescription of oral ATs  
23  
24 that comply with guidelines in terms of number of drugs, drug class, duration and dosage,  
25  
26 each assessed separately; (2) prescription of oral ATs that comply with guidelines (fully  
27  
28 appropriate prescription, number of drugs, drug class, duration and dosage each assessed  
29  
30 separately) by medical specialty of physicians responding (cardiologist or general  
31  
32 practitioner); (3) the degree of confidence of physicians have that their prescription of ATs  
33  
34 complies with guidelines; 4) for physicians allocated to receive the prescription support-tool  
35  
36 only, the overall usefulness of the tool.  
37  
38  
39  
40  
41

### 42 **Intervention**

43  
44 We developed, from a systematic review of international guidelines published between 2012  
45  
46 and 2018 (n=70),[9] a prescription support-tool to help physicians prescribe oral AT  
47  
48 combinations for complying with guidelines. This prescription support-tool synthesizes, on a  
49  
50 double-sided page, selected international guidelines on chronic management (at least 1  
51  
52 month) of oral AT combinations (indication, drugs, dosages and duration) in adults, without  
53  
54 considering in-hospital management, bridging therapy and primary prevention (**Figure 1**).[9].  
55  
56 We excluded particular clinical situations that require inevitably specialist medical advice:  
57  
58  
59  
60

1  
2  
3 active cancer, autoimmune diseases, haemophilia, HIV, paediatrics and pregnancy. The  
4 following pathologies were included in this tool because they are the main causes leading to  
5 the prescription of ATs (single, dual or triple therapy) in adults[1]: non-valvular atrial  
6 fibrillation, coronary artery disease, ischemic stroke, valvular heart disease, peripheral artery  
7 disease and venous thromboembolism. Our tool also specifies the type of oral ATs that should  
8 never be combined (combinations of oral anticoagulants [OACs], combinations of P2Y12  
9 inhibitors or combining one OAC with one potent P2Y12 inhibitor, namely ticagrelor or  
10 prasugrel), the clinical situations in which oral AT combinations are never indicated and the  
11 contraindications of ATs. This prescription support-tool aims to give physicians quick access  
12 to the recommendation that fits most of their patient's clinical situation. The prescription  
13 support-tool is accompanied by an explanatory guide (how to read and use the tool, with  
14 examples, **Appendix 1**).[9]

### 30 **Clinical vignettes**

31  
32 The clinical vignettes illustrating plausible clinical situations have been developed to reflect  
33 clinical practice.[10,11] Such an approach has been found valid in measuring quality of  
34 care.[12,13] Each clinical vignette corresponds to a specific situation for which physicians  
35 will have to indicate, by answering a multiple-choice question, whether they would prescribe  
36 oral ATs, with the number, type, duration and dosage. All answers to clinical vignettes'  
37 questions can be found in the prescription support-tool. An example of a clinical vignette is  
38 presented in **Appendix 2**. Two physicians (1 cardiologist and 1 internist-geriatrician) from the  
39 scientific committee have created 30 clinical vignettes covering most outpatient clinical  
40 situations (without considering in-hospital management, bridging therapy and primary  
41 prevention) for which the long-term use of oral ATs (single, dual or triple therapy) is  
42 recommended or needs to be stopped according to the guidelines.

### 58 **Randomization**

1  
2  
3 Physicians will be allocated to the two arms in blocks of 4 by use of a computer-generated  
4 randomization scheme implemented in the online survey (1:1 ratio), then stratified by their  
5  
6  
7  
8 medical specialty.  
9

### 10 **Data collection methods and data management**

11  
12 Data from physicians' answers will be automatically integrated in a database for statistical  
13  
14 analysis. The data will be completely anonymous. In particular, neither the physician's name  
15  
16 nor email address will be collected (there will be no login for participants). There is no  
17  
18 planned follow-up in this trial.  
19

### 20 **Sample size and statistical considerations**

21  
22  
23 Considering that 85% of AT prescriptions fully comply with guidelines in the control arm,[8]  
24  
25 to demonstrate an increase in this proportion up to 90% in the experimental arm, we need to  
26  
27 include (for a power of 80% and an alpha risk of 5%) a minimum of 229 physicians per arm.  
28  
29 To obtain a multiple of 10 physicians (because each physician will complete 3 of 30 clinical  
30  
31 vignettes and to have all clinical vignettes completed the same number of times in each arm),  
32  
33 we plan to include at least 230 physicians per arm. However, if more physicians participate,  
34  
35 all collected data will be considered. For each clinical vignette, we will consider that  
36  
37 prescription is fully appropriate (versus inappropriate) if answers to each of the first four  
38  
39 questions (number of drugs, drug class, dosage and duration) comply with the guidelines. To  
40  
41 compare the percentage of fully appropriate prescriptions between the two randomized arms,  
42  
43 taking into account that each participant intends to complete 3 clinical vignettes, we will use a  
44  
45 logistic mixed model with a clinical-vignette effect and a physician-effect nested in the trial  
46  
47 arm. We will use the same method to compare the percentage of prescriptions of oral ATs that  
48  
49 comply with guidelines in terms of number of drugs, drug class, duration and dosage, each  
50  
51 assessed separately, between the two randomized arms (secondary analyses). To compare the  
52  
53 degree of confidence that physicians have that their prescription of oral AT combinations  
54  
55  
56  
57  
58  
59  
60

1  
2  
3 complies with guidelines (quantitative variable: scale from 0 and 10), taking into account that  
4  
5 each participant intends to complete 3 clinical vignettes, we will use a linear mixed model  
6  
7 with a clinical-vignette effect and a physician-effect nested in the trial arm. A sub-group  
8  
9 analysis for general practitioners and for cardiologist will be done. Finally, to assess the  
10  
11 overall usefulness of the tool, we will describe the data of the experimental arm (mean  $\pm$  SD,  
12  
13 median (25–75 interquartile range)). All analyses will involve use of R v3.5.2 ([www.cran.r-](http://www.cran.r-project.org)  
14  
15 [project.org](http://www.cran.r-project.org)).  
16  
17

### 18 19 **Scientific and expert committees**

20  
21 Our study involves a scientific committee and an expert committee. The scientific committee  
22  
23 consists of a cardiologist, 2 internist-geriatricians, a general practitioner and 2  
24  
25 epidemiologists. The scientific committee designed the study protocol, created and validated  
26  
27 the clinical vignettes and will be responsible for data analysis and writing of the manuscript.  
28  
29 The expert committee consists of a cardiologist, a geriatrician, an internist and 2 general  
30  
31 practitioners (medical specialties that often deal with patients needing chronic oral AT  
32  
33 prescriptions). The expert committee had to review all clinical vignettes with the prescription  
34  
35 support-tool (external validation) to confirm the agreement of the clinical vignettes with  
36  
37 clinical practice and their readability. The committee estimated the time needed to complete 3  
38  
39 clinical vignettes at 10 minutes.  
40  
41  
42  
43

### 44 **Patient and Public Involvement**

45  
46 Patients and/or the public have not been involved in the development of the research or in the  
47  
48 study design because only physicians are enrolled and they will not care for patients in the  
49  
50 context of this trial; they just complete clinical vignettes. The main objective of this study is  
51  
52 to evaluate a tool for physicians to help with prescribing AT combinations.  
53  
54  
55  
56  
57

### 58 **ETHICS AND DISSEMINATION**

1  
2  
3 The ethics evaluation committee of Inserm, the *Institutional Review Board* (IRB00003888)  
4 approved our research project (no. 18-492). If the prescription support-tool is associated with  
5 improving the prescription of oral ATs to comply with guidelines, it will be disseminated to  
6 help improve ATs prescriptions. We will create an interactive web tool to improve the  
7 ergonomics of the tool and to facilitate the updates. We will assess the impact of this  
8 interactive web tool in terms of clinical outcomes in real life. This will be the second step, but  
9 we feel that we must first demonstrate that the use of the prescription support-tool (on paper)  
10 is associated with better prescription appropriateness before launching a trial involving  
11 patients with clinical outcomes. Results of this trial will be disseminated in a paper submitted  
12 to a peer-reviewed journal and presentations at relevant conferences.  
13  
14  
15  
16  
17  
18  
19  
20  
21  
22  
23  
24  
25  
26  
27

28 **Figure 1 legend:** 2019 synthesis of recommendations for chronic management of  
29 antithrombotic combinations  
30  
31  
32  
33  
34  
35  
36  
37  
38  
39  
40  
41  
42  
43  
44  
45  
46  
47  
48  
49  
50  
51  
52  
53  
54  
55  
56  
57  
58  
59  
60

## ACKNOWLEDGMENTS

**Authors' contributions:** LZ, DBZ, AD and FT designed the study. YDR designed the statistical analysis. LZ and MHM designed the clinical vignettes. PF, AMM, EP, PC and JPC reviewed the clinical vignettes. LZ, DBZ, MHM, AD and FT validated the clinical vignettes. LZ drafted and prepared the manuscript for publication. All authors re-read and corrected the manuscript. All authors approved the final manuscript.

**We thank Sebastien Zerah who designed the online survey.**

**English editing** by Laura Smales (BioMedEditing).

**Funding statement:** This work was supported by Sorbonne Université (PhD grant).

**Competing interests:** None.

**Ethics approval:** The ethics evaluation committee of Inserm, the *Institutional Review Board* (IRB00003888) reviewed and approved our research project on 06/12/2018 (no. 18-492). The ethics evaluation committee of Inserm reviewed and approved a revised version of the protocol on 10/03/18 (no. 18-492 bis) to allow us to communicate our trial via social networks or word of mouth.

**Trial registration:** ClinicalTrials.gov ID: NCT03630874.

**The study start date is November 2018.**



**REFERENCES**

1. Mega JL, Simon T. Pharmacology of antithrombotic drugs: an assessment of oral antiplatelet and anticoagulant treatments. *Lancet* 2015;**386**:281–91. doi:10.1016/S0140-6736(15)60243-4.
2. Patel NS, Patel TK, Patel PB, *et al.* Hospitalizations due to preventable adverse reactions—a systematic review. *Eur J Clin Pharmacol* 2017;**73**:385–98. doi:10.1007/s00228-016-2170-6.
3. Wester K, Jönsson AK, Spigset O, *et al.* Incidence of fatal adverse drug reactions: a population based study. *Brit J Clin Pharmacol* 2008;**65**:573–9. doi:10.1111/j.1365-2125.2007.03064.x.
4. Pirmohamed M, James S, Meakin S, *et al.* Adverse drug reactions as cause of admission to hospital: prospective analysis of 18 820 patients. *BMJ* 2004;**329**:15-19.
5. Hansen ML, Sørensen R, Clausen MT, *et al.* Risk of bleeding with single, dual, or triple therapy with warfarin, aspirin, and clopidogrel in patients with atrial fibrillation. *Arch Intern Med* 2010;**170**:1433–41. doi:10.1001/archinternmed.2010.271.
6. O'Mahony D, O'Sullivan D, Byrne S, *et al.* STOPP/START criteria for potentially inappropriate prescribing in older people: version 2. *Age Ageing* 2014;**44**:213-218. doi:10.1093/ageing/afu145.
7. By the American Geriatrics Society 2015 Beers Criteria Update Expert Panel. American Geriatrics Society 2015 updated beers criteria for potentially inappropriate medication use in older adults. *J Am Geriatr Soc* 2015;**63**:2227-2246. doi:10.1111/jgs.13702.
8. Hamilton K, Davis C, Falk J, *et al.* Assessing prescribing of NSAIDs, antiplatelets, and anticoagulants in Canadian family medicine using chart review. *Int J Clin Pharm* 2016;**38**:1094–1102. doi: 10.1007/s11096-016-0335-0.
9. Zerah L, Bun RS, Guillo S, *et al.* A prescription support-tool for chronic management of oral antithrombotic combinations in adults based on a systematic review of international guidelines. *PLoS One* 2019;**14**:e0211695. doi: 10.1371/journal.pone.0211695.
10. Engel J, van der Wulp I, Poldervaart JM, *et al.* Clinical decision-making of cardiologists regarding admission and treatment of patients with suspected unstable angina or non-ST-elevation myocardial infarction: protocol of a clinical vignette study. *BMJ Open* 2015;**5**:e006441. doi: 10.1136/bmjopen-2014-006441.
11. Bachmann LM, Mühleisen A, Bock A, *et al.* Vignette studies of medical choice and judgement to study caregivers' medical decision behaviour: systematic review. *BMC Med Res Methodol* 2008;**8**:50. doi: 10.1186/1471-2288-8-50.
12. Peabody JW, Luck J, Glassman P, *et al.* Comparison of vignettes, standardized patients, and chart abstraction: a prospective validation study of 3 methods for measuring quality. *JAMA* 2000;**283**:1715-1722.

- 1  
2  
3 13. Peabody JW, Luck J, Glassman P, *et al.* Measuring the quality of physician practice by  
4 using clinical vignettes: a prospective validation study. *Ann Intern Med* 2004;**141**:771-  
5 780.  
6  
7  
8  
9  
10  
11  
12  
13  
14  
15  
16  
17  
18  
19  
20  
21  
22  
23  
24  
25  
26  
27  
28  
29  
30  
31  
32  
33  
34  
35  
36  
37  
38  
39  
40  
41  
42  
43  
44  
45  
46  
47  
48  
49  
50  
51  
52  
53  
54  
55  
56  
57  
58  
59  
60

For peer review only



1  
2  
3  
4  
5  
6  
7  
8  
9  
10  
11  
12  
13  
14  
15  
16  
17  
18  
19  
20  
21  
22  
23  
24  
25  
26  
27  
28  
29  
30  
31  
32  
33  
34  
35  
36  
37  
38  
39  
40  
41

# How to use the prescription support tool

# General presentation of the prescription support tool

Colour codes for single, dual or triple therapy

Codes for duration of treatments

2019 SYNTHESIS OF RECOMMENDATIONS FOR CHRONIC MANAGEMENT OF ANTITHROMBOTIC COMBINATIONS INDICATIONS, DURATION AND DOSAGE IN ADULTS

|           |                                                               |
|-----------|---------------------------------------------------------------|
| SINGLE    | Single Therapy: Antiplatelet (SAPT) or Anticoagulation (SACT) |
| DUAL SAPT | Dual Antiplatelet Therapy (DAPT)                              |
| DUAL      | Dual Therapy (SAPT + SACT)                                    |
| TRIPLE    | Triple Therapy (DAPT + SACT)                                  |

|                        |                                                                                               |
|------------------------|-----------------------------------------------------------------------------------------------|
| THERAPY 1 or THERAPY 2 | Modulation between two therapies depending on patient condition (according to striped colors) |
|                        | Minimum therapy duration                                                                      |
|                        | Maximum therapy duration                                                                      |
|                        | Recommended therapy duration                                                                  |

Abbreviations

**ABCD<sup>2</sup>** score for TIA  
 Clinical features of the TIA (unilateral weakness (+2), speech disturbance without weakness (+1), other symptoms (0))  
 Duration of symptoms (< 10 min (0), 10-59 min (+1), ≥60 min (+2))  
 BP ≥ 140/90 mmHg (+1)    Diabetes (+1)

**ACS** Acute Coronary Syndrome  
**Aspl** Aspirin  
**BMS** Bare-Metal Stent  
**CABG** Coronary Artery By Pass Graft  
**CHA2DS2-VASc** C Congestive Heart failure (+1)  
 H Hypertension (+1)    A2 Age ≥ 75 (+2)  
 D Diabetes Mellitus (+1)    S2 Prior stroke or TIA/thromboembolism (+1)  
 V Vascular disease (+1)    A Age 65-74 (+1)

Dosage of antithrombotic drugs

**Aspirin:** 75-100 mg/day  
**Aspirin/dipyridamol:** 25/200 mg twice a day  
**Aspirin/ticlopidogrel:** 75 mg/day  
**Aspirin/prasugrel:** 10 mg/day (5 mg/day in patients with body weight < 60 kg)  
 Contraindications for prasugrel: previous intracranial haemorrhage, previous ischaemic stroke or transient ischaemic attack, or ongoing bleeds; prasugrel is not recommended for patients >75 years of age or with a body weight <60 kg  
**Ticlopidogrel:** 90 mg twice a day  
 Contraindications for ticagrelor: previous intracranial haemorrhage or ongoing bleeds.  
**Rivaroxaban:** 600 mg/day  
 3 for NV-AF, VTE, LV thrombus

**! Dual or triple anti-thrombotic therapies are NEVER recommended in:**

- NV-AF CHA2DS2-VASc score ≥ 2 for male and ≥ 3 for female and/or VTE\* (including cerebral venous thrombosis and post-embolic pulmonary hypertension) and/or mechanical heart valve:
  - isolated
  - associated with:
    - ischaemic stroke
    - and/or LEAD without recent revascularisation procedure
    - and/or carotid or vertebral stenosis without stent
    - and/or coronary artery disease without recent invasive procedure or acute syndrome
    - and/or bioprosthesis
- Embolism ischaemic stroke
- Recurrent stroke despite SAPT
- Mitral stenosis and previous stroke or left atrial thrombus
- Carotid or vertebral stenosis (except with stent) } Indications for SAPT
- Carotid or vertebral dissection } SAPT or SACT. 3-6 month
- Valvular bioprosthesis } 3-6 months of SACT (SAPT for patients with aortic bioprosthesis at high risk of bleeding)

**Indications for SACT**

**Combinations of anti-thrombotic drugs NEVER recommended:**

- 2 OAC (except in switches)
- 2 P2Y12 inhibitors (= Clopidogrel, Ticagrelor, Prasugrel)
- OAC + Ticagrelor or Prasugrel
- DOA are contraindicated in patients with a mechanical valve

Clinical situations for which a single antithrombotic treatment is recommended (NEVER a combination)

Combinations of antithrombotic drugs NEVER recommended

Recommended dosages for each drug

Abbreviations used in the tool

CLINICAL SITUATIONS NOT FOUND IN THIS TOOL, NEED A SPECIALIST'S OP

|          |                                                                                                                                                                                                                                                           |
|----------|-----------------------------------------------------------------------------------------------------------------------------------------------------------------------------------------------------------------------------------------------------------|
| Clopi    | Clopidogrel                                                                                                                                                                                                                                               |
| CTLI     | Chronic Limb-Threatening Ischemia                                                                                                                                                                                                                         |
| DAPT     | Dual Antiplatelet Therapy                                                                                                                                                                                                                                 |
| DCB      | Drug-Coated Balloon                                                                                                                                                                                                                                       |
| DES      | Drug-Eluting Stent                                                                                                                                                                                                                                        |
| DOA      | Direct Oral Anticoagulant                                                                                                                                                                                                                                 |
| DUAL     | Dual Therapy: SAPT + SACT                                                                                                                                                                                                                                 |
| HAS BLED | Abnormal renal (+1) or liver function (+2)<br>Hypertension (+1)    Stroke history (+1)<br>Prior major Bleeding or predisposition to bleeding (+1)<br>Labile INR (+1)    Elderly > 65 (+1)<br>Drugs (concomitant Aspl, Clopi, NSAIDs (+1)) or alcohol (+2) |
| INR      | International Normalized Ratio                                                                                                                                                                                                                            |
| LEAD     | Lower Extremity Artery Disease                                                                                                                                                                                                                            |
| LV       | Left Ventricular                                                                                                                                                                                                                                          |
| NIHSS    | National Institutes of Health Stroke Scale                                                                                                                                                                                                                |
| NSTE-ACS | Non-ST Elevation Acute Coronary Syndrome                                                                                                                                                                                                                  |
| NV-AF    | Non-valvular atrial fibrillation                                                                                                                                                                                                                          |
| OAC      | Oral Anticoagulation: VKA or DOA                                                                                                                                                                                                                          |
| PCI      | Percutaneous coronary intervention (= DES, BMS or DCB)                                                                                                                                                                                                    |
| Prasu    | Prasugrel                                                                                                                                                                                                                                                 |
| SAPT     | Single Antiplatelet Therapy                                                                                                                                                                                                                               |
| SACT     | Single Anticoagulation Therapy                                                                                                                                                                                                                            |
| SIHD     | Stable Ischaemic Heart Disease                                                                                                                                                                                                                            |
| STEMI    | ST-Elevation Myocardial Infarction                                                                                                                                                                                                                        |
| TAVR     | Transcatheter Aortic Valve Replacement                                                                                                                                                                                                                    |
| TIA      | Transient Ischaemic Attack                                                                                                                                                                                                                                |
| Tica     | Ticagrelor                                                                                                                                                                                                                                                |
| Trifu    | Trifluralin                                                                                                                                                                                                                                               |
| TRIPLE   | Triple Therapy: DAPT + SACT                                                                                                                                                                                                                               |
| VKA      | Vitamin K Antagonist Transcatheter Aortic Valve                                                                                                                                                                                                           |
| VTE      | Venous Thromboembolism                                                                                                                                                                                                                                    |

Target INR for mechanical valves

**TARGET INR FOR MECHANICAL PROSTHESE** Patient-related risk factor\*

| Prosthesis thromboembolism | None | ≥1  |
|----------------------------|------|-----|
| Low <sup>†</sup>           | 2.5  | 3.0 |
| Medium <sup>‡</sup>        | 3.0  | 3.5 |
| High <sup>§</sup>          | 3.5  | 4.0 |

INR = international normalized ratio, DEF = left ventricular ejection fraction  
 \* Mitral or tricuspid valve replacement, previous thrombotic atrial fibrillation, mitral stenosis of any degree, LVF, etc.  
 † Carbomedics, Medtronic Hall, AFS, Medtronic Pro, St-Jude Medical, On-X, Sorin Bicarbon  
 ‡ Other bileaflet valve with insufficient antithrombotic treatment  
 § Lillehei-Kaster, Omniscience, Edwards (ball-cage), Bjork-Shiley and other tilting-disc valves

**THE COCKCROFT AND GAULT FORMULA (1973)**  
 $CrCl = \frac{[(140 - \text{Age}) \times \text{Weight}] / (72 \times Sc_{Cr}) \times 0.85 \text{ (if female)}}{1}$   
 CrCl (creatinine clearance) = mL/minute  
 Age = years    Weight = kg    Sc<sub>Cr</sub> (serum creatinine) = mg/dL

**IF BLEEDING DURING DAPT, follow these recommendations (Aureus, https://www.escardio.org/Guidelines/Clinical-Practice-Guidelines/2019-2020/antithrombotic-therapy-in-atrial-fibrillation)**

**SPECIFIC CONDITIONS REQUIRING SYSTEMATICALLY AN IN-HOSPITAL SPECIALIST HAVE BEEN EXCLUDED:** cancer, auto-immune disease, hemophilia, human immunodeficiency virus (HIV), pediatrics and pregnancy and in-hospital prescriptions (including bridging therapy, perioperative therapy, and treatment of acute phase of cardiovascular disease)

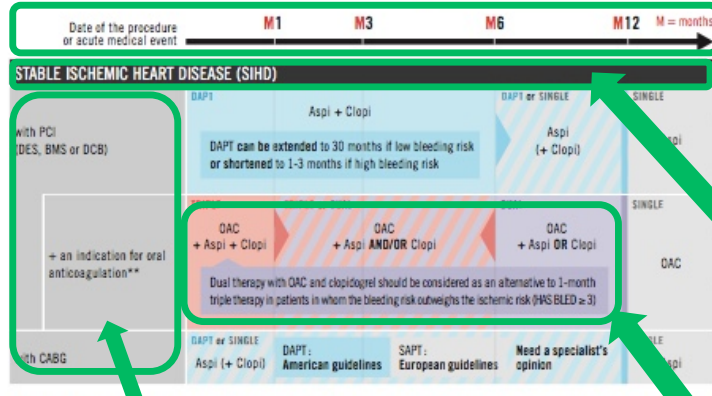

Timeline (in months) since diagnosis or beginning of treatment

Pathology

Time dependant recommended treatments

\* Anticoagulant treatment for VTE disease should be continued for 3 months if there is a triggering factor, 3 to 6 months if it is idiopathic, and for long-term if it is recurrent or associated with a pathology at risk

\*\* Indication for OAC: Mechanical heart valve prosthesis, NV-AF or flutter with CHA2DS2-VASc score ≥ 2 for men and ≥ 3 for female. Oral anticoagulation therapy to prevent thromboembolism should be considered in male AF patients with a CHA2DS2-VASc score of 1 and in female AF patients with a CHA2DS2-VASc score of 2. For VTE disease, OAC should be continued for 3 months if there is a triggering factor, to 6 months if it is idiopathic, and for long-term if it is recurrent or associated with a pathology at risk. Once the anticoagulant treatment is complete for VTE disease, the patient will be treated as a patient without indication for oral anticoagulation.

Treatments performed +/- association with another pathology that may influence antithrombotic treatment

Link for recommendations if bleeding during DAPT

Specific conditions not included in the tool

Cockcroft and Gault formula

# In practice

## Example 1: one cardiovascular disease

1  
2  
3  
4  
5  
6  
7  
8  
9  
10  
11  
12  
13  
14  
15  
16  
17  
18  
19  
20  
21  
22  
23  
24  
25  
26  
27  
28  
29  
30  
31  
32  
33  
34  
35  
36  
37  
38  
39  
40  
41

- 1
  - 2
  - 3
  - 4
  - 5
  - 6
  - 7
  - 8
  - 9
  - 10
  - 11
  - 12
  - 13
  - 14
  - 15
  - 16
  - 17
  - 18
  - 19
  - 20
  - 21
  - 22
  - 23
  - 24
  - 25
  - 26
  - 27
  - 28
  - 29
  - 30
  - 31
  - 32
  - 33
  - 34
  - 35
  - 36
  - 37
  - 38
  - 39
  - 40
  - 41
- At your medical consultation, you meet Mr R, 85 years old (weight: 81 kg, body mass index: 24 kg/m<sup>2</sup>).
  - Medical history: arterial hypertension and Parkinson disease
  - He had surgery 8 months ago for an aortic stenosis: transcatheter aortic valve replacement (TAVR)
  - Which antithrombotic therapy is recommended in this clinical situation?



1- Locate in the chapter headings of the tool, the cardiovascular disease of your patient

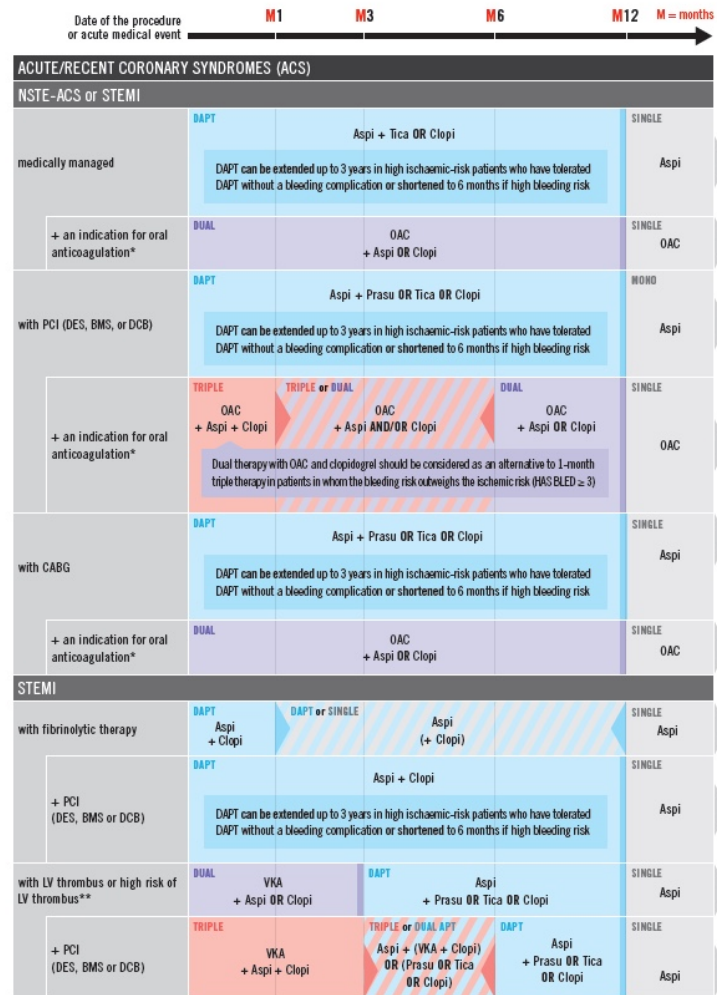

\*Indication for OAC: Mechanical heart valve prosthesis, NV-AF or flutter with CHA2DS2-VASc score  $\geq 2$  for men and  $\geq 3$  for female. Oral anticoagulation therapy to prevent thromboembolism should be considered in male AF patients with a CHA2DS2-VASc score of 1 and in female AF patients with a CHA2DS2-VASc score of 2. For VTE disease, OAC should be continued for 3 months if there is a triggering factor, 3 to 6 months if it is idiopathic, and for long-term if it is recurrent or associated with a pathology at risk. Once the anticoagulant treatment is complete for VTE disease, the patient will be treated as a patient without indication for oral anticoagulation.

\*\* High risk for LV thrombus: Ejection Fraction < 40%, Anteroseptal wall motion abnormality.

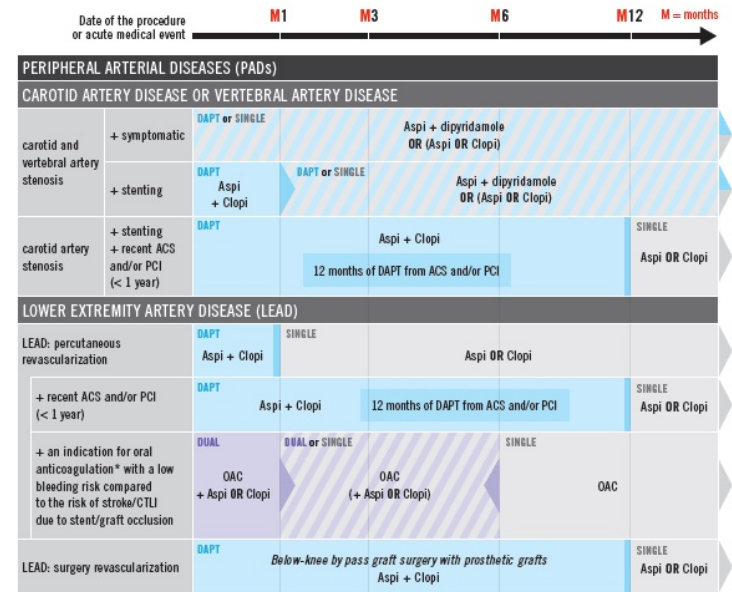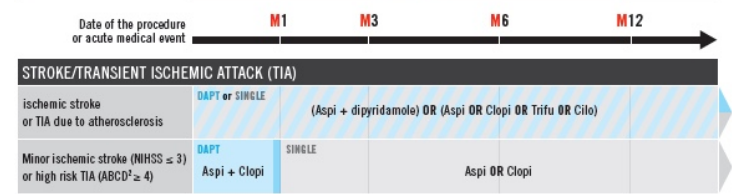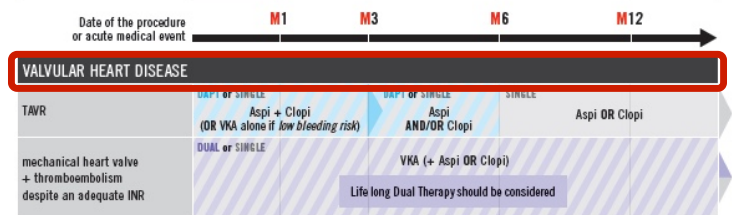

\*Indication for OAC: Mechanical heart valve prosthesis, NV-AF or flutter with CHA2DS2-VASc score  $\geq 2$  for men and  $\geq 3$  for female. Oral anticoagulation therapy to prevent thromboembolism should be considered in male AF patients with a CHA2DS2-VASc score of 1 and in female AF patients with a CHA2DS2-VASc score of 2. For VTE disease, OAC should be continued for 3 months if there is a triggering factor, 3 to 6 months if it is idiopathic, and for long-term if it is recurrent or associated with a pathology at risk. Once the anticoagulant treatment is complete for VTE disease, the patient will be treated as a patient without indication for oral anticoagulation.

1  
2  
3  
4  
5  
6  
7  
8  
9  
10  
11  
12  
13  
14  
15  
16  
17  
18  
19  
20  
21  
22  
23  
24  
25  
26  
27  
28  
29  
30  
31  
32  
33  
34  
35  
36  
37  
38  
39  
40  
41

2- Locate the precise clinical situation of your patient (treatment already performed, associated pathologies etc.)

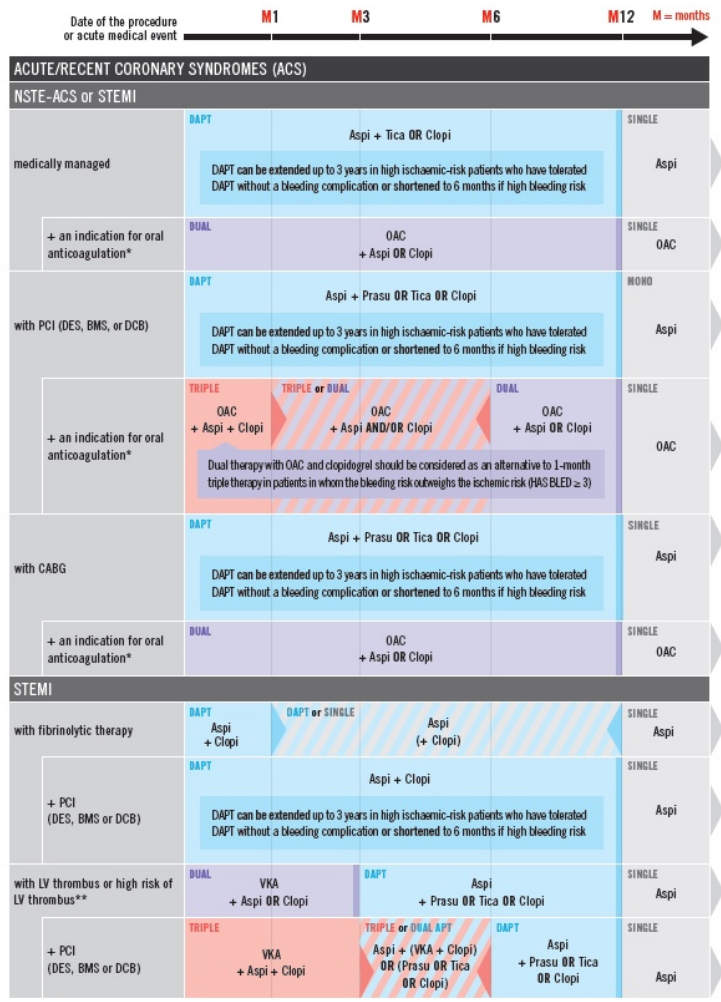

\*Indication for OAC: Mechanical heart valve prosthesis, NV-AF or flutter with CHA2DS2-VASc score ≥ 2 for men and ≥ 3 for female. Oral anticoagulation therapy to prevent thromboembolism should be considered in male AF patients with a CHA2DS2-VASc score of 1 and in female AF patients with a CHA2DS2-VASc score of 2. For VTE disease, OAC should be continued for 3 months if there is a triggering factor, 3 to 6 months if it is idiopathic, and for long-term if it is recurrent or associated with a pathology at risk. Once the anticoagulant treatment is complete for VTE disease, the patient will be treated as a patient without indication for oral anticoagulation.

\*\* High risk for LV thrombus: Ejection Fraction < 40%, Anteroseptal wall motion abnormality.

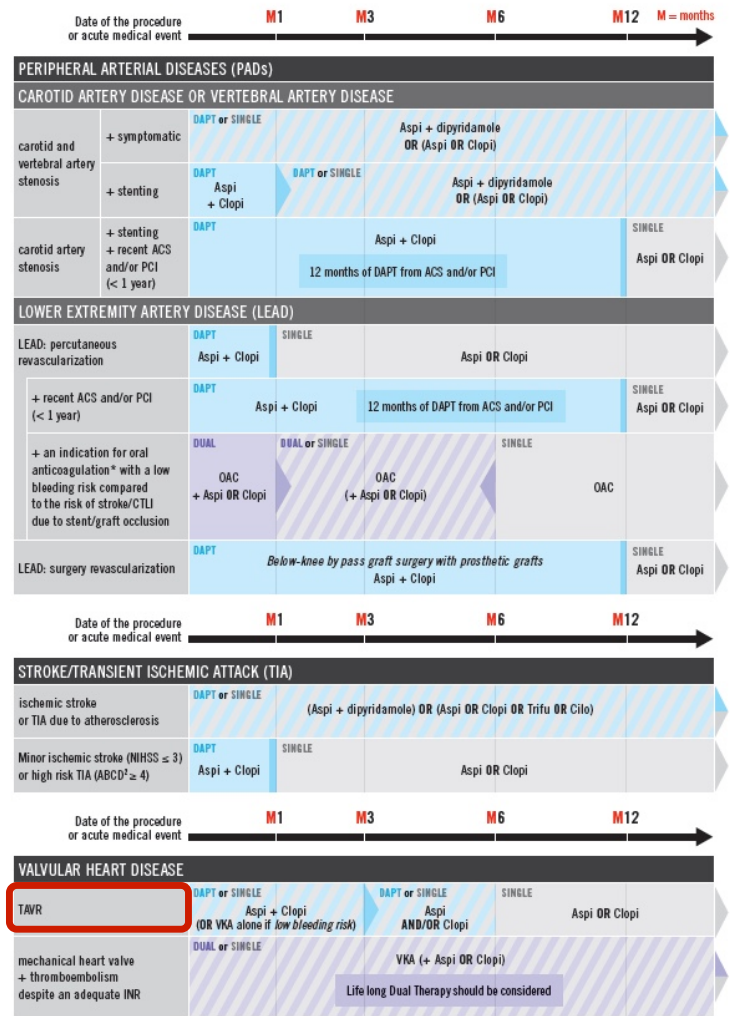

\*Indication for OAC: Mechanical heart valve prosthesis, NV-AF or flutter with CHA2DS2-VASc score ≥ 2 for men and ≥ 3 for female. Oral anticoagulation therapy to prevent thromboembolism should be considered in male AF patients with a CHA2DS2-VASc score of 1 and in female AF patients with a CHA2DS2-VASc score of 2. For VTE disease, OAC should be continued for 3 months if there is a triggering factor, 3 to 6 months if it is idiopathic, and for long-term if it is recurrent or associated with a pathology at risk. Once the anticoagulant treatment is complete for VTE disease, the patient will be treated as a patient without indication for oral anticoagulation.

1  
2  
3  
4  
5  
6  
7  
8  
9  
10  
11  
12  
13  
14  
15  
16  
17  
18  
19  
20  
21  
22  
23  
24  
25  
26  
27  
28  
29  
30  
31  
32  
33  
34  
35  
36  
37  
38  
39  
40  
41

3- In the recommended treatment, find out where your patient is currently (here: 8 months)

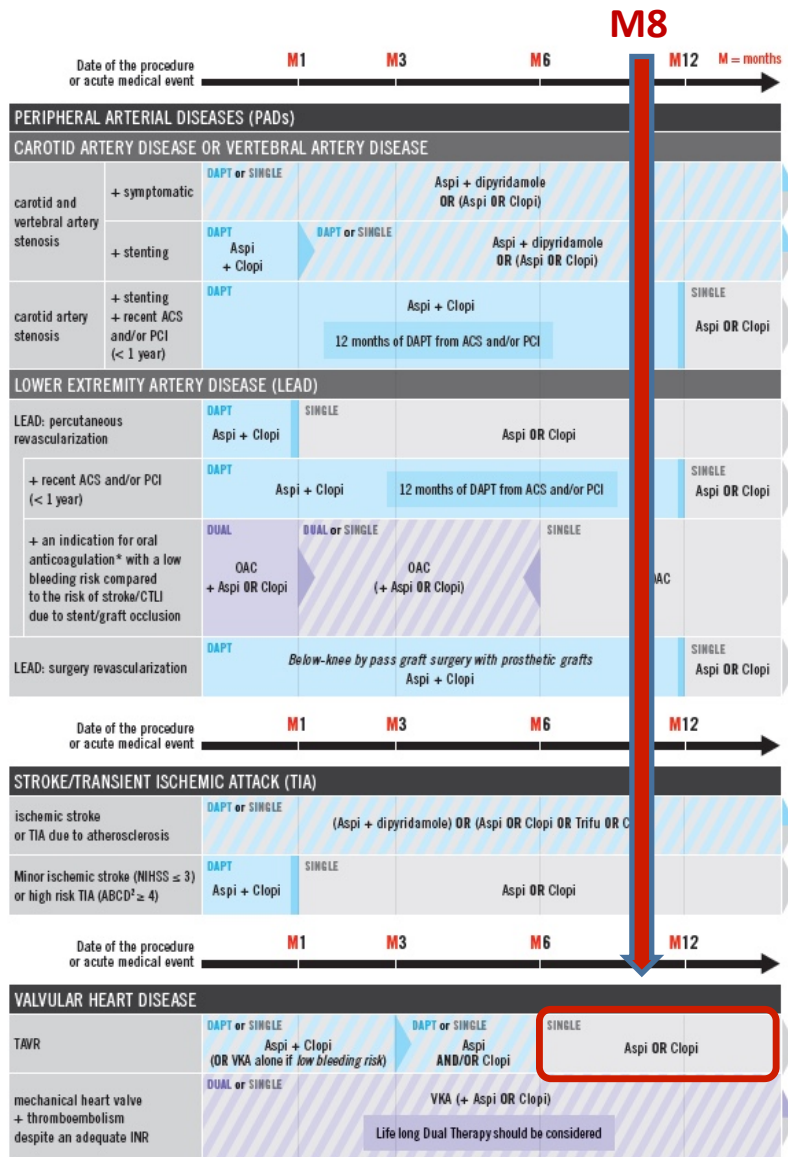

Long-term single antithrombotic therapy is recommended:  
1) Aspirin  
2) Clopidogrel

\*Indication for OAC: Mechanical heart valve prosthesis, NV-AF or flutter with CHA2DS2-VASC score ≥ 2 for men and ≥ 3 for female. Oral anticoagulation therapy to prevent thromboembolism should be considered in male AF patients with a CHA2DS2-VASC score of 1 and in female AF patients with a CHA2DS2-VASC score of 2. For VTE disease, OAC should be continued for 3 months if there is a triggering factor, 3 to 6 months if it is idiopathic, and for long-term if it is recurrent or associated with a pathology at risk. Once the anticoagulant treatment is complete for VTE disease, the patient will be treated as a patient without indication for oral anticoagulation.

1  
2  
3  
4  
5  
6  
7  
8  
9  
10  
11  
12  
13  
14  
15  
16  
17  
18  
19  
20  
21  
22  
23  
24  
25  
26  
27  
28  
29  
30  
31  
32  
33  
34  
35  
36  
37  
38  
39  
40  
41

4- Check the recommended dosage for the drugs you want to prescribe

|          |                                                                  |
|----------|------------------------------------------------------------------|
| SINGLE   | Single Therapy:<br>Antiplatelet (SAPT) or Anticoagulation (SACT) |
| DUAL APT | Dual Antiplatelet Therapy (DAPT)                                 |
| DUAL     | Dual Therapy (SAPT + SACT)                                       |
| TRIPLE   | Triple Therapy (DAPT + SACT)                                     |

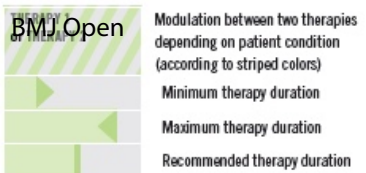

**Abbreviations**

- ABCD<sup>2</sup> score for TIA** Age ≥ 60 years (+1)  
 Clinical features of the TIA (unilateral weakness (+2), speech disturbance without weakness (+1), other symptoms (0))  
 Duration of symptoms (< 10 min (0), 10-59 min (+1), ≥ 60 min (+2))  
 BP ≥ 140/90 mmHg (+1) Diabetes (+1)
- ACS** Acute Coronary Syndrome  
**Aspi** Aspirin  
**BMS** Bare-Metal Stent  
**CABG** Coronary Artery By Pass Graft  
**CHA2DS2-VASc** C Congestive Heart failure (+1)  
 H Hypertension (+1) A2 Age ≥ 75 (+2)  
 D Diabetes Mellitus (+1) S2 Prior stroke or TIA/thromboembolism (+2)  
 V Vascular disease (+1) A Age 65-74 (+1)  
 Sc Sex category (i.e.: female sex) (+1)
- Cilo** Cilostazol  
**Clopi** Clopidogrel  
**CTLI** Chronic Limb-Threatening Ischemia  
**DAPT** Dual Antiplatelet Therapy  
**DCB** Drug-Coated Balloon  
**DES** Drug-Eluting Stent  
**DOA** Direct Oral Anticoagulant  
**DUAL** Dual Therapy: SAPT + SACT  
**HAS BLED** Abnormal renal / liver function (+1 or +2)  
 Hypertension (+1) Stroke history (+1)  
 Prior major Bleeding or predisposition to bleeding (+1)  
 Labile INR (+1) Elderly > 65 (+1)  
 Drugs (concomitant aspirin, clopidogrel, NSAIDs) or alcohol (+1 or +2)
- INR** International Normalized Ratio  
**LEAD** Lower Extremity Artery Disease  
**LV** Left Ventricular  
**NIHSS** National Institutes of Health Stroke Scale  
**NSTE-ACS** Non-ST Elevation Acute Coronary Syndrome  
**NV-AF** Non-valvular atrial fibrillation  
**OAC** Oral Anticoagulant: VKA or DOA  
**PCI** Percutaneous coronary intervention (= DES, BMS or DCB)  
**Prasugr** Prasugrel  
**SAPT** Single Antiplatelet Therapy  
**SACT** Single Anticoagulation Therapy  
**SCAD** Stable coronary artery disease  
**STEMI** ST-Elevation Myocardial Infarction  
**TAVR** Transcatheter Aortic Valve Replacement  
**TIA** Transient Ischemic Attack  
**Tica** Ticagrelor  
**Triflu** Triflusal  
**TRIPLE** Triple Therapy: DAPT + SACT  
**VKA** Vitamin K Antagonist Transcatheter Aortic Valve  
**VTE** Venous Thromboembolism

CLINICAL SITUATIONS NOT FOUND IN THIS TOOL NEED A SPECIALIST'S OPINION

**Dosage of antithrombotic drugs**

- Aspirin:** 75-100 mg/day  
**Aspirin/dipyridamole:** 25/200 mg twice a day  
**Cilostazol:** 100 mg twice a day  
**Clopidogrel:** 75 mg/day
- Prasugrel:** 10 mg/day (5 mg/day in patients with body weight < 60 kg)  
 Contraindications for prasugrel: previous intracranial haemorrhage, previous ischaemic stroke or transient ischaemic attack, or ongoing bleeds; prasugrel is not recommended for patients >75 years of age or with a body weight <60 kg.
- Ticagrelor:** 90 mg twice a day  
 Contraindications for ticagrelor: previous intracranial haemorrhage or ongoing bleeds.
- Triflusal:** 600 mg/day  
**VKA:** target INR 2-3 for NV-AF, VTE; LV thrombus  
**Rivaroxaban (Xarelto):**  
 • Venous thrombo-embolism (venous thrombosis/pulmonary embolism): D1 to D21: 15 mg x 2/day then from D22 onwards: 20 mg/day in a single take  
 • For the prevention of embolic stroke in patients with NV-AF: 20 mg/day in a single take  
 • No adjustment on weight, age, sex  
 • Renal failure  
 - Contraindication with creatinine clearance < 15 ml/min  
 - With creatinine clearance between 15-49 ml/min:  
 § NV-AF: 15 mg/day  
 § Venous thrombo-embolism: 15 mg x 2/day during the first three weeks then 20 mg/day in a single take  
 - No adjustment beyond a creatinine clearance > 50 ml/min
- Apixaban (Eliquis):**  
 • For the prevention of embolic stroke in patients with NV-AF:  
 - 5 mg x 2/day  
 - NV-AF and at least two of the following: age ≥ 80 yo, weight ≤ 60 kg, serum creatinine ≥ 133 micromol/L: 2,5 mg x 2/day  
 - With creatinine clearance between 15-29 ml/min: 2,5 mg x 2/day  
 - Contraindication with creatinine clearance < 15 ml/min
- Venous thrombo-embolism (venous thrombosis/pulmonary embolism): D1 to D7: 10 mg x 2/day then from D8 onwards: 5 mg x 2/day
- Dabigatran (Pradaxa):**  
 • For the prevention of embolic stroke in patients with NV-AF or VTE treatment, after treatment with a parenteral anticoagulant for at least 5 days: 150 mg x 2/day  
 • 110 mg x 2/day if:  
 § > 80 yo  
 § Patients also treated with Verapamil  
 § clearance between 30-50 ml/min  
 • Contraindication with creatinine clearance < 30 ml/min

- 1) Aspirin 75-100 mg/day
- 2) OR Clopidogrel 75 mg/day

**THE COCKCROFT AND GAULT FORMULA (1973)**

$$C_{Cr} = \frac{((140 - \text{Age}) \times \text{Weight})}{(72 \times S_{Cr})} \times 0.85 \text{ (if female)}$$

C<sub>Cr</sub> (creatinine clearance) = mL/minute  
 Age = years Weight = kg S<sub>Cr</sub> (serum creatinine) = mg/dL

**IF BLEEDING DURING DAPT, follow these recommendations (figure 10):**

<https://www.escardio.org/Guidelines/Clinical-Practice-Guidelines/2017-focused-update-on-dual-antiplatelet-therapy-dapt>

**SPECIFIC CONDITIONS REQUIRING SYSTEMATICALLY AN IN-HOSPITAL SPECIALIST HAVE BEEN EXCLUDED:**

cancer, auto-immune disease, hemophilia, human immunodeficiency virus (HIV), pediatrics and pregnancy and In-hospital prescriptions (including bridging therapy, perioperative therapy, and treatment of acute phase of cardiovascular event)

| TARGET INR FOR MECHANICAL PROSTHESE | Patient-related risk factor <sup>a</sup> |     |
|-------------------------------------|------------------------------------------|-----|
| Prosthesis thrombogenicity          | None                                     | ≥1  |
| Low <sup>b</sup>                    | 2.5                                      | 3.0 |
| Medium <sup>c</sup>                 | 3.0                                      | 3.5 |
| High <sup>d</sup>                   | 3.5                                      | 4.0 |

INR = international normalized ratio; LVEF = left ventricular ejection fraction  
<sup>a</sup> Mitral or tricuspid valve replacement, previous thromboembolism; atrial fibrillation, mitral stenosis of any degree, LVEF < 35%  
<sup>b</sup> Carbomedics, Medtronic Hall, ATS, Medtronic Open-Pivot, St-Jude Medical, On-X, Four-Blade  
<sup>c</sup> Other bileaflet valve with insufficient data  
<sup>d</sup> Lillehei-Kaster, Omniscience, Starr-Edwards (ball-cage), Bjork Shiley and other tilting-disc valves

review only - <http://www.escardio.org/Guidelines/Clinical-Practice-Guidelines/2017-focused-update-on-dual-antiplatelet-therapy-dapt>

# In practice

## Example 2: two cardiovascular diseases

1  
2  
3  
4  
5  
6  
7  
8  
9  
10  
11  
12  
13  
14  
15  
16  
17  
18  
19  
20  
21  
22  
23  
24  
25  
26  
27  
28  
29  
30  
31  
32  
33  
34  
35  
36  
37  
38  
39  
40  
41

- 1  
2  
3  
4  
5  
6  
7  
8  
9  
10  
11  
12  
13  
14  
15  
16  
17  
18  
19  
20  
21  
22  
23  
24  
25  
26  
27  
28  
29  
30  
31  
32  
33  
34  
35  
36  
37  
38  
39  
40  
41
- At your medical consultation, you meet Mr V, 55 years old (weight: 81 kg, body mass index: 24 kg/m<sup>2</sup>).
  - Medical history: arterial hypertension (controlled), diabetes, renal failure (creatinine clearance with Cockcroft formula: 30 ml/min) and permanent non-valvular atrial fibrillation
  - He had an acute coronary syndrome 5 months ago with a percutaneous coronary intervention (PCI)
  - Which antithrombotic therapy is recommended in this clinical situation?

Date of the procedure or acute medical event **M1** **M3** **BMJ Open** **M12** **M = months**

| ACUTE/RECENT CORONARY SYNDROMES (ACS)                                                                                                                                                   |                    |                                                                                                                                                                           |                                                  |                               |        |
|-----------------------------------------------------------------------------------------------------------------------------------------------------------------------------------------|--------------------|---------------------------------------------------------------------------------------------------------------------------------------------------------------------------|--------------------------------------------------|-------------------------------|--------|
| NSTE-ACS or STEMI                                                                                                                                                                       |                    |                                                                                                                                                                           |                                                  |                               |        |
| medically managed                                                                                                                                                                       |                    | DAPT                                                                                                                                                                      | Aspi + Tica OR Clopi                             |                               | SINGLE |
|                                                                                                                                                                                         |                    | DAPT can be extended up to 3 years in high ischaemic-risk patients who have tolerated DAPT without a bleeding complication or shortened to 6 months if high bleeding risk |                                                  |                               |        |
| + an indication for oral anticoagulation*                                                                                                                                               | DUAL               | OAC + Aspi OR Clopi                                                                                                                                                       |                                                  | SINGLE                        | OAC    |
| with PCI (DES, BMS, or DCB)                                                                                                                                                             |                    | DAPT                                                                                                                                                                      | Aspi + Prasu OR Tica OR Clopi                    |                               | MONO   |
|                                                                                                                                                                                         |                    | DAPT can be extended up to 3 years in high ischaemic-risk patients who have tolerated DAPT without a bleeding complication or shortened to 6 months if high bleeding risk |                                                  |                               |        |
| + an indication for oral anticoagulation*                                                                                                                                               | TRIPLE             | TRIPLE or DUAL                                                                                                                                                            | OAC + Aspi AND/OR Clopi                          | DUAL                          | SINGLE |
|                                                                                                                                                                                         | OAC + Aspi + Clopi |                                                                                                                                                                           |                                                  | OAC + Aspi OR Clopi           | OAC    |
| Dual therapy with OAC and clopidogrel should be considered as an alternative to 1-month triple therapy in patients in whom the bleeding risk outweighs the ischemic risk (HAS BLED ≥ 3) |                    |                                                                                                                                                                           |                                                  |                               |        |
| with CABG                                                                                                                                                                               |                    | DAPT                                                                                                                                                                      | Aspi + Prasu OR Tica OR Clopi                    |                               | SINGLE |
|                                                                                                                                                                                         |                    | DAPT can be extended up to 3 years in high ischaemic-risk patients who have tolerated DAPT without a bleeding complication or shortened to 6 months if high bleeding risk |                                                  |                               |        |
| + an indication for oral anticoagulation*                                                                                                                                               | DUAL               | OAC + Aspi OR Clopi                                                                                                                                                       |                                                  | SINGLE                        | OAC    |
| STEMI                                                                                                                                                                                   |                    |                                                                                                                                                                           |                                                  |                               |        |
| with fibrinolytic therapy                                                                                                                                                               |                    | DAPT<br>Aspi + Clopi                                                                                                                                                      | DAPT or SINGLE                                   | Aspi (+ Clopi)                | SINGLE |
|                                                                                                                                                                                         |                    | DAPT can be extended up to 3 years in high ischaemic-risk patients who have tolerated DAPT without a bleeding complication or shortened to 6 months if high bleeding risk |                                                  |                               |        |
| + PCI (DES, BMS or DCB)                                                                                                                                                                 | DAPT               | Aspi + Clopi                                                                                                                                                              |                                                  | SINGLE                        | Aspi   |
| with LV thrombus or high risk of LV thrombus**                                                                                                                                          |                    | DUAL                                                                                                                                                                      | VKA + Aspi OR Clopi                              | DAPT                          | SINGLE |
|                                                                                                                                                                                         |                    |                                                                                                                                                                           |                                                  | Aspi + Prasu OR Tica OR Clopi | Aspi   |
| + PCI (DES, BMS or DCB)                                                                                                                                                                 | TRIPLE             | VKA + Aspi + Clopi                                                                                                                                                        | TRIPLE or DUAL DAPT                              | DAPT                          | SINGLE |
|                                                                                                                                                                                         |                    |                                                                                                                                                                           | Aspi + (VKA + Clopi) OR (Prasu OR Tica OR Clopi) | Aspi + Prasu OR Tica OR Clopi | Aspi   |

\* Indication for OAC: Mechanical heart valve prosthesis, NV-AF or flutter with CHA2DS2-VASc score ≥ 2 for men and ≥ 3 for female. Oral anticoagulation therapy to prevent thromboembolism should be considered in male AF patients with a CHA2DS2-VASc score of 1 and in female AF patients with CHA2DS2-VASc score of 2. For VTE disease, OAC should be continued for 3 months if there is a triggering factor, 3 to 6 months if it is idiopathic, and for long-term if it is recurrent or associated with a pathology at risk. Once the anticoagulant treatment is complete for VTE disease, the patient will be treated as a patient without indication for oral anticoagulation.

\*\* High risk for LV thrombus: Ejection Fraction < 40%, Anteroapical wall motion abnormality.

1- Locate in the chapter headings of the tool, the cardiovascular disease of your patient

| ACUTE/RECENT CORONARY SYNDROMES (ACS)                                                                                                                                                   |                                           | M1                                                                                                                                                                        | M3                                                                  | BMJ Open                      | M12                           | M = months |
|-----------------------------------------------------------------------------------------------------------------------------------------------------------------------------------------|-------------------------------------------|---------------------------------------------------------------------------------------------------------------------------------------------------------------------------|---------------------------------------------------------------------|-------------------------------|-------------------------------|------------|
| <b>NSTE-ACS or STEMI</b>                                                                                                                                                                |                                           |                                                                                                                                                                           |                                                                     |                               |                               |            |
| medically managed                                                                                                                                                                       |                                           | DAPT                                                                                                                                                                      | Aspi + Tica OR Clopi                                                |                               |                               | SINGLE     |
|                                                                                                                                                                                         |                                           | DAPT can be extended up to 3 years in high ischaemic-risk patients who have tolerated DAPT without a bleeding complication or shortened to 6 months if high bleeding risk |                                                                     |                               |                               | Aspi       |
|                                                                                                                                                                                         | + an indication for oral anticoagulation* | DUAL                                                                                                                                                                      | OAC + Aspi OR Clopi                                                 |                               |                               | SINGLE OAC |
| with PCI (DES, BMS, or DCB)                                                                                                                                                             |                                           | DAPT                                                                                                                                                                      | Aspi + Prasu OR Tica OR Clopi                                       |                               |                               | MONO       |
|                                                                                                                                                                                         |                                           | DAPT can be extended up to 3 years in high ischaemic-risk patients who have tolerated DAPT without a bleeding complication or shortened to 6 months if high bleeding risk |                                                                     |                               |                               | Aspi       |
|                                                                                                                                                                                         | + an indication for oral anticoagulation* | TRIPLE OAC + Aspi + Clopi                                                                                                                                                 | TRIPLE or DUAL OAC + Aspi AND/OR Clopi                              | DUAL OAC + Aspi OR Clopi      | SINGLE OAC                    |            |
| Dual therapy with OAC and clopidogrel should be considered as an alternative to 1-month triple therapy in patients in whom the bleeding risk outweighs the ischemic risk (HAS BLED ≥ 3) |                                           |                                                                                                                                                                           |                                                                     |                               |                               |            |
| with CABG                                                                                                                                                                               |                                           | DAPT                                                                                                                                                                      | Aspi + Prasu OR Tica OR Clopi                                       |                               |                               | SINGLE     |
|                                                                                                                                                                                         |                                           | DAPT can be extended up to 3 years in high ischaemic-risk patients who have tolerated DAPT without a bleeding complication or shortened to 6 months if high bleeding risk |                                                                     |                               |                               | Aspi       |
|                                                                                                                                                                                         | + an indication for oral anticoagulation* | DUAL                                                                                                                                                                      | OAC + Aspi OR Clopi                                                 |                               |                               | SINGLE OAC |
| <b>STEMI</b>                                                                                                                                                                            |                                           |                                                                                                                                                                           |                                                                     |                               |                               |            |
| with fibrinolytic therapy                                                                                                                                                               |                                           | DAPT Aspi + Clopi                                                                                                                                                         | DAPT or SINGLE                                                      | Aspi (+ Clopi)                | SINGLE                        |            |
|                                                                                                                                                                                         |                                           | DAPT can be extended up to 3 years in high ischaemic-risk patients who have tolerated DAPT without a bleeding complication or shortened to 6 months if high bleeding risk |                                                                     |                               |                               | Aspi       |
|                                                                                                                                                                                         | + PCI (DES, BMS or DCB)                   | DAPT                                                                                                                                                                      | Aspi + Clopi                                                        |                               |                               | SINGLE     |
| with LV thrombus or high risk of LV thrombus**                                                                                                                                          |                                           | DUAL VKA + Aspi OR Clopi                                                                                                                                                  | DAPT                                                                | Aspi + Prasu OR Tica OR Clopi |                               | SINGLE     |
|                                                                                                                                                                                         |                                           | TRIPLE VKA + Aspi + Clopi                                                                                                                                                 | TRIPLE or DUAL APT Aspi + (VKA + Clopi) OR (Prasu OR Tica OR Clopi) | DAPT                          | Aspi + Prasu OR Tica OR Clopi |            |

2- Locate the precise clinical situation of your patient (treatment already performed, associated pathologies etc.)

\* Indication for OAC: Mechanical heart valve prosthesis, NV-AF or flutter with CHA2DS2-VASc score ≥ 2 for men and ≥ 3 for female. Oral anticoagulation therapy to prevent thromboembolism should be considered in male AF patients with a CHA2DS2-VASc score of 1 and in female AF patients with a CHA2DS2-VASc score of 2. For VTE disease, OAC should be continued for 3 months if there is a triggering factor, 3 to 6 months if it is idiopathic, and for long-term if it is recurrent or associated with a pathology at risk. Once the anticoagulant treatment is complete for VTE disease, the patient will be treated as a patient without indication for oral anticoagulation.

\*\* High risk for LV thrombus: Ejection Fraction < 40%, Anteroapical wall motion abnormality.



1  
2  
3 **2bis- Locate the**  
4 **precise clinical**  
5 **situation of your**  
6 **patient**  
7 **(treatment**  
8 **already**  
9 **performed,**  
10 **associated**  
11 **pathologies etc.)**

| Date of the procedure or acute medical event   | M1                                                                                                                                                                                      | M3                                          | M6                                                                    | M12                                         | M = months |
|------------------------------------------------|-----------------------------------------------------------------------------------------------------------------------------------------------------------------------------------------|---------------------------------------------|-----------------------------------------------------------------------|---------------------------------------------|------------|
| <b>ACUTE/RECENT CORONARY SYNDROMES (ACS)</b>   |                                                                                                                                                                                         |                                             |                                                                       |                                             |            |
| <b>NSTE-ACS or STEMI</b>                       |                                                                                                                                                                                         |                                             |                                                                       |                                             |            |
| medically managed                              | DAPT                                                                                                                                                                                    | Aspi + Tica <b>OR</b> Clopi                 |                                                                       |                                             | SINGLE     |
|                                                | DAPT can be extended up to 3 years in high ischaemic-risk patients who have tolerated DAPT without a bleeding complication or shortened to 6 months if high bleeding risk               |                                             |                                                                       |                                             | Aspi       |
| + an indication for oral anticoagulation*      | DUAL                                                                                                                                                                                    | OAC + Aspi <b>OR</b> Clopi                  |                                                                       |                                             | SINGLE     |
|                                                |                                                                                                                                                                                         |                                             |                                                                       |                                             | OAC        |
| with PCI (DES, BMS, or DCB)                    | DAPT                                                                                                                                                                                    | Aspi + Prasu <b>OR</b> Tica <b>OR</b> Clopi |                                                                       |                                             | MONO       |
|                                                | DAPT can be extended up to 3 years in high ischaemic-risk patients who have tolerated DAPT without a bleeding complication or shortened to 6 months if high bleeding risk               |                                             |                                                                       |                                             | Aspi       |
| + an indication for oral anticoagulation*      | TRIPLE                                                                                                                                                                                  | TRIPLE or DUAL                              | OAC + Aspi <b>AND/OR</b> Clopi                                        | DUAL                                        | SINGLE     |
|                                                | OAC + Aspi + Clopi                                                                                                                                                                      | OAC + Aspi                                  | OAC + Aspi <b>OR</b> Clopi                                            | OAC + Aspi <b>OR</b> Clopi                  | OAC        |
|                                                | Dual therapy with OAC and clopidogrel should be considered as an alternative to 1-month triple therapy in patients in whom the bleeding risk outweighs the ischemic risk (HAS BLED ≥ 3) |                                             |                                                                       |                                             |            |
| with CABG                                      | DAPT                                                                                                                                                                                    | Aspi + Prasu <b>OR</b> Tica <b>OR</b> Clopi |                                                                       |                                             | SINGLE     |
|                                                | DAPT can be extended up to 3 years in high ischaemic-risk patients who have tolerated DAPT without a bleeding complication or shortened to 6 months if high bleeding risk               |                                             |                                                                       |                                             | Aspi       |
| + an indication for oral anticoagulation*      | DUAL                                                                                                                                                                                    | OAC + Aspi <b>OR</b> Clopi                  |                                                                       |                                             | SINGLE     |
|                                                |                                                                                                                                                                                         |                                             |                                                                       |                                             | OAC        |
| <b>STEMI</b>                                   |                                                                                                                                                                                         |                                             |                                                                       |                                             |            |
| with fibrinolytic therapy                      | DAPT                                                                                                                                                                                    | DAPT or SINGLE                              | Aspi (+ Clopi)                                                        |                                             | SINGLE     |
|                                                | Aspi + Clopi                                                                                                                                                                            |                                             |                                                                       |                                             | Aspi       |
| + PCI (DES, BMS or DCB)                        | DAPT                                                                                                                                                                                    | Aspi + Clopi                                |                                                                       |                                             | SINGLE     |
|                                                | DAPT can be extended up to 3 years in high ischaemic-risk patients who have tolerated DAPT without a bleeding complication or shortened to 6 months if high bleeding risk               |                                             |                                                                       |                                             | Aspi       |
| with LV thrombus or high risk of LV thrombus** | DUAL                                                                                                                                                                                    | VKA + Aspi <b>OR</b> Clopi                  | DAPT                                                                  | Aspi + Prasu <b>OR</b> Tica <b>OR</b> Clopi | SINGLE     |
|                                                |                                                                                                                                                                                         |                                             |                                                                       |                                             | Aspi       |
| + PCI (DES, BMS or DCB)                        | TRIPLE                                                                                                                                                                                  | VKA + Aspi + Clopi                          | TRIPLE or DUAL APT                                                    | DAPT                                        | SINGLE     |
|                                                |                                                                                                                                                                                         |                                             | Aspi + (VKA + Clopi) <b>OR</b> (Prasu <b>OR</b> Tica <b>OR</b> Clopi) | Aspi + Prasu <b>OR</b> Tica <b>OR</b> Clopi | Aspi       |

**ABBREVIATIONS**

- CHA2DS2-VASc** C Congestive Heart failure (+1)
- H Hypertension (+1) A2 Age ≥ 75 (+2)
- D Diabetes Mellitus (+1) S2 Prior stroke or TIA thromboembolism (+2)
- V Vascular disease (+1) A Age 65-74 (+1)
- Sc Sex category (i.e.: female sex) (+1)

**Hypertension and diabetes = 2 points**  
**→ Indication for oral anticoagulation**

- HAS BLED** Abnormal renal / liver function (+1 or +2)
- Hypertension (+1) Stroke history (+1)
- Prior major Bleeding or predisposition to bleeding (+1)
- Labile INR (+1) Elderly > 65 (+1)
- Drugs (concomitant aspirin, clopidogrel, NSAIDs) or alcohol (+1 or +2)

**Abnormal renal function = 1 point**  
**Drugs = 1 point**  
**HAS BLED = 2**

36  
37\* **Indication for OAC: Mechanical heart valve prosthesis, NV-AF or flutter with CHA2DS2-VASc score ≥ 2 for men and ≥ 3 for female. Oral anticoagulation therapy to**  
38 **prevent thromboembolism should be considered in male AF patients with a CHA2DS2-VASc score of 1 and in female AF patients with a CHA2DS2-VASc score of 2. For**  
39  
40  
41

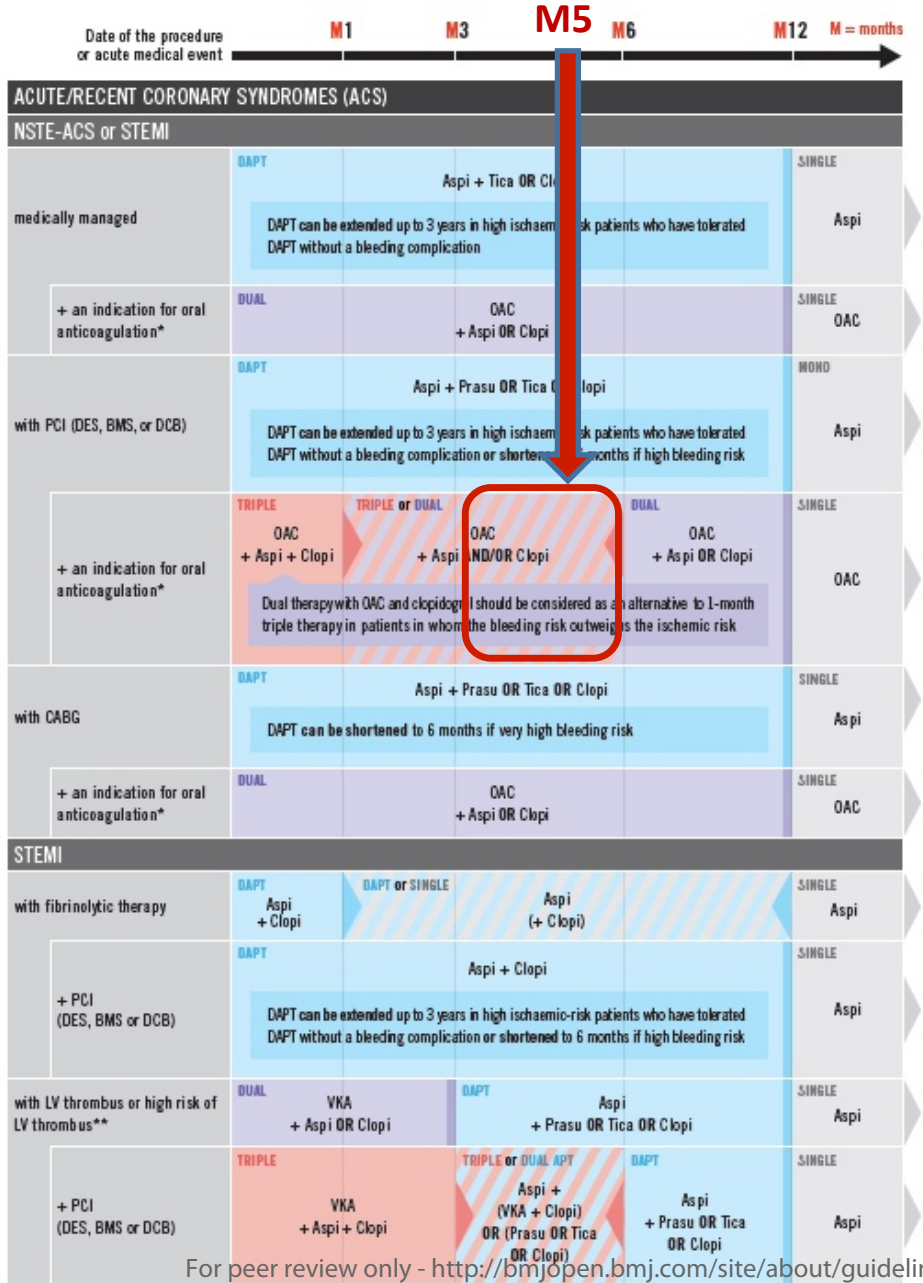

1  
2  
3  
4  
5  
6  
7  
8  
9  
10  
11  
12  
13  
14  
15  
16  
17  
18  
19 **3- In the**  
20 **recommended**  
21 **treatment, find**  
22 **out where your**  
23 **patient is**  
24 **currently**  
25 **(here: 5**  
26 **months)**

**Here, two options are possible according to the ischemic and bleeding risk of your patient:**

- 1) Dual therapy: OAC + Aspirin OR Clopidogrel up to 12 months (so for another 7 months)
- 2) Triple therapy: OAC + Aspirin + Clopidogrel up to 6 months (so for another 1 month) and then a dual therapy with OAC + Aspirin OR Clopidogrel up to 12 months (so for another 6 months)

For peer review only - <http://bmjopen.bmj.com/site/about/guidelines.xhtml>

a pathology at risk. Once the anticoagulant treatment is complete for VTE disease, the patient will be treated as a patient without indication for oral anticoagulation.  
 \*\* High risk for LV thrombus: Ejection Fraction < 40%, Anteroapical wall motion abnormality.

|          |                                                                  |
|----------|------------------------------------------------------------------|
| SINGLE   | Single Therapy:<br>Antiplatelet (SAPT) or Anticoagulation (SACT) |
| DUAL APT | Dual Antiplatelet Therapy (DAPT)                                 |
| DUAL     | Dual Therapy (SAPT + SACT)                                       |
| TRIPLE   | Triple Therapy (DAPT + SACT)                                     |

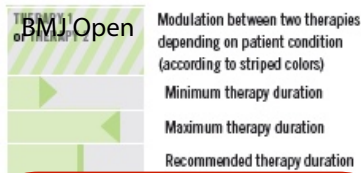

## Abbreviations

|                                       |                                                                                                                       |
|---------------------------------------|-----------------------------------------------------------------------------------------------------------------------|
| <b>ABCD<sup>2</sup> score for TIA</b> | Age ≥ 60 years (+1)                                                                                                   |
|                                       | Clinical features of the TIA (unilateral weakness (+2), speech disturbance without weakness (+1), other symptoms (0)) |
|                                       | Duration of symptoms (< 10 min (0), 10-59 min (+1), ≥ 60 min (+2))                                                    |
|                                       | BP ≥ 140/90 mmHg (+1)      Diabetes (+1)                                                                              |
| <b>ACS</b>                            | Acute Coronary Syndrome                                                                                               |
| <b>Aspi</b>                           | Aspirin                                                                                                               |
| <b>BMS</b>                            | Bare-Metal Stent                                                                                                      |
| <b>CABG</b>                           | Coronary Artery By Pass Graft                                                                                         |
| <b>CHA2DS2-VASc</b>                   | C Congestive Heart failure (+1)                                                                                       |
|                                       | H Hypertension (+1)      A2 Age ≥ 75 (+2)                                                                             |
|                                       | D Diabetes Mellitus (+1)      S2 Prior stroke or TIA/thromboembolism (+1)                                             |
|                                       | V Vascular disease (+1)      A Age 65-74 (+1)                                                                         |
|                                       | Sc Sex category (i.e.: female sex) (+1)                                                                               |
| <b>Cilo</b>                           | Cilostazol                                                                                                            |
| <b>Clopi</b>                          | Clopidogrel                                                                                                           |
| <b>CTLI</b>                           | Chronic Limb-Threatening Ischemia                                                                                     |
| <b>DAPT</b>                           | Dual Antiplatelet Therapy                                                                                             |
| <b>DCB</b>                            | Drug-Coated Balloon                                                                                                   |
| <b>DES</b>                            | Drug-Eluting Stent                                                                                                    |
| <b>DOA</b>                            | Direct Oral Anticoagulant                                                                                             |
| <b>DUAL</b>                           | Dual Therapy: SAPT + SACT                                                                                             |
| <b>HAS BLED</b>                       | Abnormal renal / liver function (+1 or +2)                                                                            |
|                                       | Hypertension (+1)      Stroke history (+1)                                                                            |
|                                       | Prior major Bleeding or predisposition to bleeding (+1)                                                               |
|                                       | Labile INR (+1)      Elderly > 65 (+1)                                                                                |
|                                       | Drugs (concomitant aspirin, clopidogrel, NSAIDs) or alcohol (+1 or +2)                                                |
| <b>INR</b>                            | International Normalized Ratio                                                                                        |
| <b>LEAD</b>                           | Lower Extremity Artery Disease                                                                                        |
| <b>LV</b>                             | Left Ventricular                                                                                                      |
| <b>NIBSS</b>                          | National Institutes of Health Stroke Scale                                                                            |
| <b>NSTE-ACS</b>                       | Non-ST Elevation Acute Coronary Syndrome                                                                              |
| <b>NV-AF</b>                          | Non-valvular atrial fibrillation                                                                                      |
| <b>OAC</b>                            | Oral Anticoagulant: VKA or DOA                                                                                        |
| <b>PCI</b>                            | Percutaneous coronary intervention (= DES, BMS or DCB)                                                                |
| <b>Prasu</b>                          | Prasugrel                                                                                                             |
| <b>SAPT</b>                           | Single Antiplatelet Therapy                                                                                           |
| <b>SACT</b>                           | Single Anticoagulation Therapy                                                                                        |
| <b>SCAD</b>                           | Stable coronary artery disease                                                                                        |
| <b>STEMI</b>                          | ST-Elevation Myocardial Infarction                                                                                    |
| <b>TAVR</b>                           | Transcatheter Aortic Valve Replacement                                                                                |
| <b>TIA</b>                            | Transient Ischemic Attack                                                                                             |
| <b>Tica</b>                           | Ticagrelor                                                                                                            |
| <b>Triflu</b>                         | Triflusal                                                                                                             |
| <b>TRIPLE</b>                         | Triple Therapy: DAPT + SACT                                                                                           |
| <b>VKA</b>                            | Vitamin K Antagonist Transcatheter Aortic Valve                                                                       |
| <b>VTE</b>                            | Venous Thromboembolism                                                                                                |

CLINICAL SITUATIONS NOT FOUND IN THIS TOOL NEED A SPECIALIST'S OPINION

| TARGET INR FOR MECHANICAL PROSTHESES | Patient-related risk factor <sup>a</sup> |     |
|--------------------------------------|------------------------------------------|-----|
| Prosthesis thrombogenicity           | None                                     | ≥ 1 |
| Low <sup>b</sup>                     | 2.5                                      | 3.0 |
| Medium <sup>c</sup>                  | 3.0                                      | 3.5 |
| High <sup>d</sup>                    | 3.5                                      | 4.0 |

INR = international normalized ratio; LVEF = left ventricular ejection fraction  
<sup>a</sup> Mitral or tricuspid valve replacement, previous thromboembolism; atrial fibrillation, mitral stenosis of any degree, LVEF < 35%  
<sup>b</sup> Carbomedics, Medtronic Hall, ATS, Medtronic Open-Pivot, St-Jude Medical, On-X, Sorbus  
<sup>c</sup> Other bileaflet valve with insufficient data  
<sup>d</sup> Lillehei-Kaster, Omniscience, Starr-Edwards (ball-cage), Bjork Shiley and other tilting-disc valves

## Dosage of antithrombotic drugs

Aspirin: 75-100 mg/day  
 Aspirin/dipyridamole: 25/200 mg twice a day  
 Cilostazol: 100 mg twice a day  
 Clopidogrel: 75 mg/day  
 Prasugrel: 10 mg/day (5 mg/day in patients with body weight < 60 kg)  
 Contraindications for prasugrel: previous intracranial haemorrhage, previous ischaemic stroke or transient ischaemic attack, or ongoing bleeds; prasugrel is not recommended for patients > 75 years of age or with a body weight < 60 kg.  
 Ticagrelor: 90 mg twice a day  
 Contraindications for ticagrelor: previous intracranial haemorrhage or ongoing bleeds.  
 Triflusal: 600 mg/day  
 VKA: target INR 2-3 for NV-AF, VTE, LV thrombus  
 Rivaroxaban (Xarelto):  
 • Venous thrombo-embolism (venous thrombosis/pulmonary embolism): D1 to D21: 15 mg x 2/day then from D22 onwards: 20 mg/day in a single take  
 • For the prevention of embolic stroke in patients with NV-AF: 20 mg/day in a single take  
 • No adjustment on weight, age, sex  
 • Renal failure  
 - Contraindication with creatinine clearance < 15 ml/min  
 - With creatinine clearance between 15-49 ml/min:  
 § NV-AF: 15 mg/day  
 § Venous thrombo-embolism: 15 mg x 2/day during the first three weeks then 20 mg/day in a single take  
 - No adjustment beyond a creatinine clearance > 50 ml/min  
 Apixaban (Eliquis):  
 • For the prevention of embolic stroke in patients with NV-AF:  
 - 5 mg x 2/day  
 - NV-AF and at least two of the following: age ≥ 80 yo, weight ≤ 60 kg, serum creatinine ≥ 133 micromol/L; 2.5 mg x 2/day  
 - With creatinine clearance between 15-29 ml/min: 2.5 mg x 2/day  
 - Contraindication with creatinine clearance < 15 ml/min  
 • Venous thrombo-embolism (venous thrombosis/pulmonary embolism): D1 to D7: 10 mg x 2/day then from D8 onwards: 5 mg x 2/day  
 Dabigatran (Pradaxa):  
 • For the prevention of embolic stroke in patients with NV-AF or VTE treatment, after treatment with a parenteral anticoagulant for at least 5 days: 150 mg x 2/day  
 • 110 mg x 2/day if:  
 § > 80 yo  
 § Patients also treated with Verapamil  
 § clearance between 30-50 ml/min  
 - Contraindication with creatinine clearance < 30 ml/min

## THE COCKCROFT AND GAULT FORMULA (1973)

$C_{Cr} = \left( \frac{140 - \text{Age}}{72} \times \text{Weight} \right) \times 0.85$  (if female)  
 $C_{Cr}$  (creatinine clearance) = mL/minute  
 Age = years      Weight = kg       $S_{Cr}$  (serum creatinine) = mg/dL

## IF BLEEDING DURING DAPT, follow these recommendations (figure 10):

<https://www.escardio.org/Guidelines/Clinical-Practice-Guidelines/2017-focused-update-on-dual-antiplatelet-therapy-dapt>

## SPECIFIC CONDITIONS REQUIRING SYSTEMATICALLY AN IN-HOSPITAL

**SPECIALIST HAVE BEEN EXCLUDED:** cancer, auto-immune disease, hemophilia, human immunodeficiency virus (HIV), pediatrics and pregnancy and In-hospital prescriptions (including bridging therapy, perioperative therapy, and treatment of acute phase of cardiovascular event)

4- Check the recommended dosage for the drugs you want to prescribe

## OAC:

- VKA with a target INR: 2-3
- Rivaroxaban 15 mg/day
- Apixaban 5 mg X 2/day
- Dabigatran is contraindicated

## Antiplatelets:

- Aspirin 75-100 mg/day
- Clopidogrel 75 mg/day

## **Appendix 2: Example of a clinical vignette**

At your medical consultation, you meet Mr R, 86 years old (weight: 81 kg, body mass index: 24 kg/m<sup>2</sup>). Mr R is a widower, a smoker (10 cigarettes a day, 50 pack-years) and is autonomous in all daily activities. He has no personal medical history and he takes no drug. His last biological test did not find any abnormalities (serum creatinine value: 77 µM/L, creatinine clearance using the Cockcroft-Gault formula: 70 ml/min).

He comes to see you in consultation because for more than 1 week, he has had palpitations with exercise. You perform electrocardiogram (ECG) in your office and you diagnose non-valvular atrial fibrillation. The biological assessment is without particularity (in particular blood ionography and thyroid-stimulating hormone). Cardiac ultrasonography revealed a dilated left atrium with no valve abnormality.

### **1) How many antithrombotic treatments will you prescribe during this consultation?**

- 0
- 1
- 2
- 3

### **2) If you answered 0 to question 1, go to question 5. If not, which molecule(s) of antithrombotic(s) will you prescribe during this consultation?**

- Warfarin
- Rivaroxaban
- Apixaban
- Aspirin
- Clopidogrel

### **3) Which dosage will you prescribe this(these) molecule(s)? (For each molecule checked on the previous question, it will appear:)**

- Warfarin:
  - INR (International Normalized Ratio): 2-3
  - INR (International Normalized Ratio): 2.5-3.5
- Rivaroxaban
  - 15 mg per day
  - 20 mg per day
- Apixaban
  - 2.5 mg twice a day
  - 5 mg twice a day
- Aspirin
  - 75-100 mg per day
  - 300 mg per day
- Clopidogrel
  - 75 mg per day
  - 300 mg per day

1  
2  
3 **4) How long does the antithrombotic treatment prescribed in the previous question need**  
4 **to be continued?**

- 5
- 6 • 1 month
  - 7 • 6 months
  - 8 • 12 months
  - 9 • For life
- 10

11 **5) On a scale of 0 to 10, what is your degree of confidence in the adequacy of your**  
12 **prescription in relation to the guidelines?**

13  
14  
15  
16 **For the experimental group, after completion of the 3 clinical vignettes:**

17  
18  
19 **Regarding the prescription support tool, please note the following items from 0 (strongly**  
20 **disagree) to 10 (strongly agree):**

- 21
- 22 • The prescription support-tool helped me answer to the clinical vignettes:../10
  - 23 • The prescription support-tool has modified the answers that I spontaneously made to
  - 24 clinical vignettes:../10
  - 25 • The prescription support-tool is clear:../10
  - 26 • The prescription support-tool is operational:../10
  - 27 • The prescription support-tool is useful for practice:../10
  - 28 • I would be ready to use this prescription support-tool:../10
  - 29 • I would recommend the use of this prescription support-tool:../10
- 30  
31  
32

33 **Notes on the tool: What are the points of the prescription support-tool that could be**  
34 **improved: useless information, missing information, presentation, etc:**

35  
36  
37  
38  
39  
40  
41  
42  
43  
44  
45  
46  
47  
48  
49  
50  
51  
52  
53  
54  
55  
56  
57  
58  
59  
60

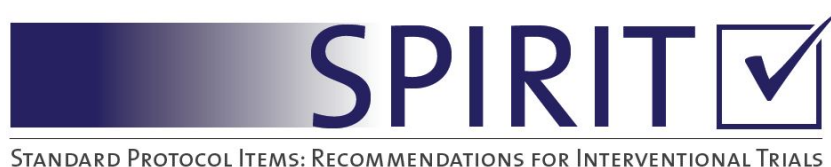

STANDARD PROTOCOL ITEMS: RECOMMENDATIONS FOR INTERVENTIONAL TRIALS

SPIRIT 2013 Checklist: Recommended items to address in a clinical trial protocol and related documents\*

| Section/item                      | Item No | Description                                                                                                                                                                                                                                                                              |
|-----------------------------------|---------|------------------------------------------------------------------------------------------------------------------------------------------------------------------------------------------------------------------------------------------------------------------------------------------|
| <b>Administrative information</b> |         |                                                                                                                                                                                                                                                                                          |
| Title                             | 1       | Descriptive title identifying the study design, population, interventions, and, if applicable, trial acronym<br>→ <b>Page 1</b>                                                                                                                                                          |
| Trial registration                | 2a      | Trial identifier and registry name. If not yet registered, name of intended registry<br>→ <b>Page 2 line 54</b>                                                                                                                                                                          |
|                                   | 2b      | All items from the World Health Organization Trial Registration Data Set                                                                                                                                                                                                                 |
| Protocol version                  | 3       | Date and version identifier<br>→ <b>line 266 - 270, page 12</b>                                                                                                                                                                                                                          |
| Funding                           | 4       | Sources and types of financial, material, and other support<br>→ <b>line 264, page 12</b>                                                                                                                                                                                                |
| Roles and responsibilities        | 5a      | Names, affiliations, and roles of protocol contributors<br>→ <b>Title page and lines 257 - 261 page 12</b>                                                                                                                                                                               |
|                                   | 5b      | Name and contact information for the trial sponsor                                                                                                                                                                                                                                       |
|                                   | 5c      | Role of study sponsor and funders, if any, in study design; collection, management, analysis, and interpretation of data; writing of the report; and the decision to submit the report for publication, including whether they will have ultimate authority over any of these activities |
|                                   | 5d      | Composition, roles, and responsibilities of the coordinating centre, steering committee, endpoint adjudication committee, data management team, and other individuals or groups overseeing the trial, if applicable (see Item 21a for data monitoring committee)                         |
| <b>Introduction</b>               |         |                                                                                                                                                                                                                                                                                          |
| Background and rationale          | 6a      | Description of research question and justification for undertaking the trial, including summary of relevant studies (published and unpublished) examining benefits and harms for each intervention<br>→ <b>Lines 68 – 98, page 4 - 5</b>                                                 |
|                                   | 6b      | Explanation for choice of comparators                                                                                                                                                                                                                                                    |

|    |                                                           |     |                                                                               |
|----|-----------------------------------------------------------|-----|-------------------------------------------------------------------------------|
| 1  |                                                           |     |                                                                               |
| 2  | Objectives                                                | 7   | Specific objectives or hypotheses                                             |
| 3  |                                                           |     | → <b>Lines 99 - 102, page 5</b>                                               |
| 4  |                                                           |     |                                                                               |
| 5  | Trial design                                              | 8   | Description of trial design including type of trial (eg, parallel group,      |
| 6  |                                                           |     | crossover, factorial, single group), allocation ratio, and framework (eg,     |
| 7  |                                                           |     | superiority, equivalence, noninferiority, exploratory)                        |
| 8  |                                                           |     |                                                                               |
| 9  |                                                           |     |                                                                               |
| 10 |                                                           |     |                                                                               |
| 11 | <b>Methods: Participants, interventions, and outcomes</b> |     |                                                                               |
| 12 |                                                           |     |                                                                               |
| 13 | Study setting                                             | 9   | Description of study settings (eg, community clinic, academic hospital)       |
| 14 |                                                           |     | and list of countries where data will be collected. Reference to where        |
| 15 |                                                           |     | list of study sites can be obtained                                           |
| 16 |                                                           |     | → <b>Lines 106 - 107 page 5</b>                                               |
| 17 |                                                           |     |                                                                               |
| 18 | Eligibility criteria                                      | 10  | Inclusion and exclusion criteria for participants. If applicable, eligibility |
| 19 |                                                           |     | criteria for study centres and individuals who will perform the               |
| 20 |                                                           |     | interventions (eg, surgeons, psychotherapists)                                |
| 21 |                                                           |     | → <b>Lines 107 - 109 page 5</b>                                               |
| 22 |                                                           |     |                                                                               |
| 23 |                                                           |     |                                                                               |
| 24 | Interventions                                             | 11a | Interventions for each group with sufficient detail to allow replication,     |
| 25 |                                                           |     | including how and when they will be administered                              |
| 26 |                                                           |     | → <b>Lines 110 - 136, page 5 - 6</b>                                          |
| 27 |                                                           |     |                                                                               |
| 28 |                                                           |     |                                                                               |
| 29 |                                                           | 11b | Criteria for discontinuing or modifying allocated interventions for a         |
| 30 |                                                           |     | given trial participant (eg, drug dose change in response to harms,           |
| 31 |                                                           |     | participant request, or improving/worsening disease)                          |
| 32 |                                                           |     |                                                                               |
| 33 |                                                           | 11c | Strategies to improve adherence to intervention protocols, and any            |
| 34 |                                                           |     | procedures for monitoring adherence (eg, drug tablet return,                  |
| 35 |                                                           |     | laboratory tests)                                                             |
| 36 |                                                           |     |                                                                               |
| 37 |                                                           |     |                                                                               |
| 38 |                                                           | 11d | Relevant concomitant care and interventions that are permitted or             |
| 39 |                                                           |     | prohibited during the trial                                                   |
| 40 |                                                           |     |                                                                               |
| 41 | Outcomes                                                  | 12  | Primary, secondary, and other outcomes, including the specific                |
| 42 |                                                           |     | measurement variable (eg, systolic blood pressure), analysis metric           |
| 43 |                                                           |     | (eg, change from baseline, final value, time to event), method of             |
| 44 |                                                           |     | aggregation (eg, median, proportion), and time point for each                 |
| 45 |                                                           |     | outcome. Explanation of the clinical relevance of chosen efficacy and         |
| 46 |                                                           |     | harm outcomes is strongly recommended                                         |
| 47 |                                                           |     | → <b>Lines 148 - 159, page 7</b>                                              |
| 48 |                                                           |     |                                                                               |
| 49 |                                                           |     |                                                                               |
| 50 | Participant                                               | 13  | Time schedule of enrolment, interventions (including any run-ins and          |
| 51 | timeline                                                  |     | washouts), assessments, and visits for participants. A schematic              |
| 52 |                                                           |     | diagram is highly recommended (see Figure)                                    |
| 53 |                                                           |     | → <b>Lines 110 - 136, page 5 - 6</b>                                          |
| 54 |                                                           |     |                                                                               |
| 55 |                                                           |     |                                                                               |
| 56 |                                                           |     |                                                                               |
| 57 |                                                           |     |                                                                               |
| 58 |                                                           |     |                                                                               |
| 59 |                                                           |     |                                                                               |
| 60 |                                                           |     |                                                                               |

- 1  
2 Sample size 14 Estimated number of participants needed to achieve study objectives  
3 and how it was determined, including clinical and statistical  
4 assumptions supporting any sample size calculations  
5 → **Lines 201 – 208, page 9**  
6  
7 Recruitment 15 Strategies for achieving adequate participant enrolment to reach  
8 target sample size  
9 → **Lines 146-147, page 7**  
10  
11

## 12 **Methods: Assignment of interventions (for controlled trials)**

### 13 Allocation:

- 14  
15  
16 Sequence generation 16a Method of generating the allocation sequence (eg, computer-  
17 generated random numbers), and list of any factors for stratification.  
18 To reduce predictability of a random sequence, details of any planned  
19 restriction (eg, blocking) should be provided in a separate document  
20 that is unavailable to those who enrol participants or assign  
21 interventions  
22 **Lines 137 – 143, page 6-7**  
23 **Lines 192 - 195 page 8-9**  
24  
25  
26 Allocation concealment mechanism 16b Mechanism of implementing the allocation sequence (eg, central  
27 telephone; sequentially numbered, opaque, sealed envelopes),  
28 describing any steps to conceal the sequence until interventions are  
29 assigned  
30 **Lines 192 - 195 page 8-9**  
31  
32  
33 Implementation 16c Who will generate the allocation sequence, who will enrol participants,  
34 and who will assign participants to interventions  
35 **Lines 192 - 195 page 8-9**  
36  
37  
38 Blinding (masking) 17a Who will be blinded after assignment to interventions (eg, trial  
39 participants, care providers, outcome assessors, data analysts), and  
40 how  
41  
42 17b If blinded, circumstances under which unblinding is permissible, and  
43 procedure for revealing a participant's allocated intervention during  
44 the trial  
45  
46

## 47 **Methods: Data collection, management, and analysis**

- 48  
49 Data collection methods 18a Plans for assessment and collection of outcome, baseline, and other  
50 trial data, including any related processes to promote data quality (eg,  
51 duplicate measurements, training of assessors) and a description of  
52 study instruments (eg, questionnaires, laboratory tests) along with  
53 their reliability and validity, if known. Reference to where data  
54 collection forms can be found, if not in the protocol  
55 → **Lines 196 – 200 page 9**  
56  
57  
58  
59  
60



- 1  
2  
3  
4  
5  
6  
7  
8  
9  
10  
11  
12  
13  
14  
15  
16  
17  
18  
19  
20  
21  
22  
23  
24  
25  
26  
27
- 18b Plans to promote participant retention and complete follow-up, including list of any outcome data to be collected for participants who discontinue or deviate from intervention protocols
- Data management 19 Plans for data entry, coding, security, and storage, including any related processes to promote data quality (eg, double data entry; range checks for data values). Reference to where details of data management procedures can be found, if not in the protocol  
→ **Lines 196 – 200 page 9**
- Statistical methods 20a Statistical methods for analysing primary and secondary outcomes. Reference to where other details of the statistical analysis plan can be found, if not in the protocol  
→ **Lines 208 - 223, page 9-10**
- 20b Methods for any additional analyses (eg, subgroup and adjusted analyses)  
→ **Lines 220 - 221, page 10**
- 20c Definition of analysis population relating to protocol non-adherence (eg, as randomised analysis), and any statistical methods to handle missing data (eg, multiple imputation)

### Methods: Monitoring

- 28  
29  
30  
31  
32  
33  
34  
35  
36  
37  
38  
39  
40  
41  
42  
43  
44  
45  
46  
47  
48  
49
- Data monitoring 21a Composition of data monitoring committee (DMC); summary of its role and reporting structure; statement of whether it is independent from the sponsor and competing interests; and reference to where further details about its charter can be found, if not in the protocol. Alternatively, an explanation of why a DMC is not needed
- 21b Description of any interim analyses and stopping guidelines, including who will have access to these interim results and make the final decision to terminate the trial
- Harms 22 Plans for collecting, assessing, reporting, and managing solicited and spontaneously reported adverse events and other unintended effects of trial interventions or trial conduct
- Auditing 23 Frequency and procedures for auditing trial conduct, if any, and whether the process will be independent from investigators and the sponsor

### Ethics and dissemination

- 50  
51  
52  
53  
54  
55  
56  
57  
58  
59  
60
- Research ethics approval 24 Plans for seeking research ethics committee/institutional review board (REC/IRB) approval  
→ **Lines 243 - 252 page 11**

|    |                   |     |                                                                               |
|----|-------------------|-----|-------------------------------------------------------------------------------|
| 1  |                   |     |                                                                               |
| 2  | Protocol          | 25  | Plans for communicating important protocol modifications (eg,                 |
| 3  | amendments        |     | changes to eligibility criteria, outcomes, analyses) to relevant parties      |
| 4  |                   |     | (eg, investigators, REC/IRBs, trial participants, trial registries, journals, |
| 5  |                   |     | regulators)                                                                   |
| 6  |                   |     |                                                                               |
| 7  | Consent or assent | 26a | Who will obtain informed consent or assent from potential trial               |
| 8  |                   |     | participants or authorised surrogates, and how (see Item 32)                  |
| 9  |                   |     |                                                                               |
| 10 |                   | 26b | Additional consent provisions for collection and use of participant data      |
| 11 |                   |     | and biological specimens in ancillary studies, if applicable                  |
| 12 |                   |     |                                                                               |
| 13 | Confidentiality   | 27  | How personal information about potential and enrolled participants will       |
| 14 |                   |     | be collected, shared, and maintained in order to protect confidentiality      |
| 15 |                   |     | before, during, and after the trial                                           |
| 16 |                   |     | → <b>Lines 198 - 199, page 9</b>                                              |
| 17 |                   |     |                                                                               |
| 18 | Declaration of    | 28  | Financial and other competing interests for principal investigators for       |
| 19 | interests         |     | the overall trial and each study site                                         |
| 20 |                   |     | → <b>Line 265, page 12</b>                                                    |
| 21 |                   |     |                                                                               |
| 22 | Access to data    | 29  | Statement of who will have access to the final trial dataset, and             |
| 23 |                   |     | disclosure of contractual agreements that limit such access for               |
| 24 |                   |     | investigators                                                                 |
| 25 |                   |     |                                                                               |
| 26 | Ancillary and     | 30  | Provisions, if any, for ancillary and post-trial care, and for                |
| 27 | post-trial care   |     | compensation to those who suffer harm from trial participation                |
| 28 |                   |     |                                                                               |
| 29 | Dissemination     | 31a | Plans for investigators and sponsor to communicate trial results to           |
| 30 | policy            |     | participants, healthcare professionals, the public, and other relevant        |
| 31 |                   |     | groups (eg, via publication, reporting in results databases, or other         |
| 32 |                   |     | data sharing arrangements), including any publication restrictions            |
| 33 |                   |     | → <b>Lines 251 - 252, page 11</b>                                             |
| 34 |                   |     |                                                                               |
| 35 |                   | 31b | Authorship eligibility guidelines and any intended use of professional        |
| 36 |                   |     | writers                                                                       |
| 37 |                   |     |                                                                               |
| 38 |                   | 31c | Plans, if any, for granting public access to the full protocol, participant-  |
| 39 |                   |     | level dataset, and statistical code                                           |
| 40 |                   |     |                                                                               |
| 41 |                   |     |                                                                               |
| 42 |                   |     |                                                                               |
| 43 |                   |     |                                                                               |
| 44 |                   |     |                                                                               |
| 45 | <b>Appendices</b> |     |                                                                               |
| 46 |                   |     |                                                                               |
| 47 | Informed consent  | 32  | Model consent form and other related documentation given to                   |
| 48 | materials         |     | participants and authorised surrogates                                        |
| 49 |                   |     |                                                                               |
| 50 | Biological        | 33  | Plans for collection, laboratory evaluation, and storage of biological        |
| 51 | specimens         |     | specimens for genetic or molecular analysis in the current trial and for      |
| 52 |                   |     | future use in ancillary studies, if applicable                                |
| 53 |                   |     |                                                                               |

\*It is strongly recommended that this checklist be read in conjunction with the SPIRIT 2013 Explanation & Elaboration for important clarification on the items. Amendments to the protocol should be tracked and dated. The SPIRIT checklist is copyrighted by the SPIRIT Group under the Creative Commons "[Attribution-NonCommercial-NoDerivs 3.0 Unported](https://creativecommons.org/licenses/by-nc-nd/3.0/)" license.

# BMJ Open

## Evaluation of a prescription support-tool for chronic management of oral antithrombotic combinations in adults using clinical vignettes: protocol of a randomized controlled trial

|                                 |                                                                                                                                                                                                                                                                                                                                                                                                                                                                                                                                                                                                                                                                                                                                                                                                                                                                                                                                                                                                                                                                                                                                                                                                                                                                                                                                                                                                                                                                                                                                                                                                                                                                                                                                                                                                                                                                                                                                                        |
|---------------------------------|--------------------------------------------------------------------------------------------------------------------------------------------------------------------------------------------------------------------------------------------------------------------------------------------------------------------------------------------------------------------------------------------------------------------------------------------------------------------------------------------------------------------------------------------------------------------------------------------------------------------------------------------------------------------------------------------------------------------------------------------------------------------------------------------------------------------------------------------------------------------------------------------------------------------------------------------------------------------------------------------------------------------------------------------------------------------------------------------------------------------------------------------------------------------------------------------------------------------------------------------------------------------------------------------------------------------------------------------------------------------------------------------------------------------------------------------------------------------------------------------------------------------------------------------------------------------------------------------------------------------------------------------------------------------------------------------------------------------------------------------------------------------------------------------------------------------------------------------------------------------------------------------------------------------------------------------------------|
| Journal:                        | <i>BMJ Open</i>                                                                                                                                                                                                                                                                                                                                                                                                                                                                                                                                                                                                                                                                                                                                                                                                                                                                                                                                                                                                                                                                                                                                                                                                                                                                                                                                                                                                                                                                                                                                                                                                                                                                                                                                                                                                                                                                                                                                        |
| Manuscript ID                   | bmjopen-2018-025544.R3                                                                                                                                                                                                                                                                                                                                                                                                                                                                                                                                                                                                                                                                                                                                                                                                                                                                                                                                                                                                                                                                                                                                                                                                                                                                                                                                                                                                                                                                                                                                                                                                                                                                                                                                                                                                                                                                                                                                 |
| Article Type:                   | Protocol                                                                                                                                                                                                                                                                                                                                                                                                                                                                                                                                                                                                                                                                                                                                                                                                                                                                                                                                                                                                                                                                                                                                                                                                                                                                                                                                                                                                                                                                                                                                                                                                                                                                                                                                                                                                                                                                                                                                               |
| Date Submitted by the Author:   | 03-May-2019                                                                                                                                                                                                                                                                                                                                                                                                                                                                                                                                                                                                                                                                                                                                                                                                                                                                                                                                                                                                                                                                                                                                                                                                                                                                                                                                                                                                                                                                                                                                                                                                                                                                                                                                                                                                                                                                                                                                            |
| Complete List of Authors:       | <p>ZERAH, Lorene; Sorbonne Université, INSERM, Institut Pierre Louis d'Epidémiologie et de Santé Publique<br/> Bonnet-Zamponi, Dominique; Sorbonne Université, INSERM, Institut Pierre Louis d'Epidémiologie et de Santé Publique; Observatoire du Médicament des Dispositifs Médicaux et de l'Innovation Thérapeutique Ile de France, OMEDIT<br/> Frappé, Paul; Institut de recherche en médecine générale; University of Saint-Etienne, Department of General Practice<br/> Hauguel-Moreau, Marie; Sorbonne Université, AP-HP, Hôpitaux Universitaires Pitié-Salpêtrière – Charles Foix, Département de cardiologie<br/> De Rycke, Yann; Sorbonne Université, INSERM, Institut Pierre Louis d'Epidémiologie et de Santé Publique; AP-HP, Hôpitaux Universitaires Pitié-Salpêtrière – Charles Foix, Département Biostatistique Santé Publique et Information Médicale, Centre de Pharmacoépidémiologie (Cephepi)<br/> Magnier, Anne-Marie; Sorbonne Université, Département de médecine générale<br/> Pautas, Eric; Sorbonne Université, AP-HP, Hôpitaux Universitaires Pitié-Salpêtrière – Charles Foix, Département de gériatrie<br/> Charles, Pierre; Institut Mutualiste Montsouris, Médecine Interne<br/> Collet, Jean-philippe; Sorbonne Université, AP-HP, Hôpitaux Universitaires Pitié-Salpêtrière – Charles Foix, Département de cardiologie<br/> Dechartres, Agnes; Sorbonne Université, INSERM, Institut Pierre Louis d'Epidémiologie et de Santé Publique; APHP, Hôpitaux Universitaires Pitié-Salpêtrière – Charles Foix, Département Biostatistique Santé Publique et Information Médicale, Centre de Pharmacoépidémiologie (Cephepi)<br/> Tubach, Florence; Sorbonne Université, INSERM, Institut Pierre Louis d'Epidémiologie et de Santé Publique; APHP, Hôpitaux Universitaires Pitié-Salpêtrière – Charles Foix, Département Biostatistique Santé Publique et Information Médicale, Centre de Pharmacoépidémiologie (Cephepi)</p> |
| <b>Primary Subject Heading</b>: | Pharmacology and therapeutics                                                                                                                                                                                                                                                                                                                                                                                                                                                                                                                                                                                                                                                                                                                                                                                                                                                                                                                                                                                                                                                                                                                                                                                                                                                                                                                                                                                                                                                                                                                                                                                                                                                                                                                                                                                                                                                                                                                          |

1  
2  
3  
4  
5  
6  
7  
8  
9  
10  
11  
12  
13  
14  
15  
16  
17  
18  
19  
20  
21  
22  
23  
24  
25  
26  
27  
28  
29  
30  
31  
32  
33  
34  
35  
36  
37  
38  
39  
40  
41  
42  
43  
44  
45  
46  
47  
48  
49  
50  
51  
52  
53  
54  
55  
56  
57  
58  
59  
60

|                            |                                                                           |
|----------------------------|---------------------------------------------------------------------------|
| Secondary Subject Heading: | Cardiovascular medicine, Evidence based practice, Public health           |
| Keywords:                  | prescription support-tool, clinical vignettes, antithrombotic combination |
|                            |                                                                           |

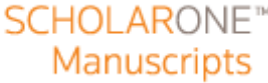

1  
2  
3 **Evaluation of a prescription support-tool for chronic management of oral**  
4 **antithrombotic combinations in adults using clinical vignettes: protocol of a randomized**  
5 **controlled trial**  
6  
7  
8  
9

10  
11  
12 Zerah L<sup>1</sup>, Bonnet-Zamponi D<sup>1,2</sup>, Frappé P<sup>3,4</sup>, Hauguel-Moreau M<sup>5</sup>, De Rycke Y<sup>1,6</sup>, Magnier  
13 AM<sup>7</sup>, Pautas E<sup>8</sup>, Charles P<sup>9</sup>, Collet JP<sup>5</sup>, Dechartres A<sup>1,6</sup>, Tubach F<sup>1,6</sup>  
14  
15

- 16 1. Sorbonne Université, INSERM, Institut Pierre Louis d'Epidémiologie et de Santé  
17 Publique, F-75013 Paris, France
- 18 2. Observatoire du Médicament des Dispositifs Médicaux et de l'Innovation Thérapeutique  
19 Ile de France (OMEDIT), Paris, France
- 20 3. Institut de recherche en médecine générale, Paris, France
- 21 4. Département de médecine générale, Université de Saint-Etienne, Saint-Etienne, France
- 22 5. Sorbonne Université, AP-HP, Hôpitaux Universitaires Pitié-Salpêtrière – Charles Foix,  
23 Département de Cardiologie, F-75013 Paris, France
- 24 6. AP-HP, Hôpitaux Universitaires Pitié-Salpêtrière – Charles Foix, Département  
25 Biostatistique Santé Publique et Information Médicale, Centre de Pharmacoépidémiologie  
26 (Cephepi), F-75013 Paris, France
- 27 7. Sorbonne Université, Département de Médecine Générale, F-75013 Paris, France
- 28 8. Sorbonne Université, AP-HP, Hôpitaux Universitaires Pitié-Salpêtrière – Charles Foix,  
29 Département de Gériatrie, F-75013 Paris, France
- 30 9. Institut Mutualiste Montsouris, Département de Médecine Interne, F-75014 Paris, France

31  
32  
33  
34  
35  
36  
37  
38  
39  
40  
41  
42 **\* Corresponding author: Dr Lorene Zerah**

43  
44 Correspondence to: [lorene.zerah@inserm.fr](mailto:lorene.zerah@inserm.fr)

45  
46 Address: Département Biostatistique Santé Publique et Information Médicale, Centre de  
47 Pharmacoépidémiologie (Cephepi), Hôpital Pitié-Salpêtrière 47 – 83 boulevard de l'hôpital,  
48 75013, Paris, France

49  
50  
51 Tel: +33 1 42 16 03 47  
52  
53  
54  
55  
56  
57  
58  
59  
60

## ABSTRACT

**Introduction:** Improving the appropriateness of prescriptions of oral antithrombotic (AT) drugs, especially AT combinations, is crucial because these drugs are implicated in bleeding events. We developed a prescription support-tool synthesizing guidelines on chronic management of oral AT combinations. Our main objective is to assess the impact of this tool on improving the prescription of oral ATs to comply with guidelines.

**Methods and analysis:** A randomized controlled trial will be conducted among French general practitioners and cardiologists involved in outpatient settings. Physicians will be invited to participate to an online survey by email via physician associations, social networks or word of mouth. They will be randomized to two arms: the experimental arm (access to the prescription support-tool) or the control arm (no prescription support-tool). Then, all participants will be presented 3 different clinical vignettes illustrating outpatient clinical situations and will be asked to propose prescriptions for each vignette (number of ATs, type, dosage and duration). A computer-generated randomization scheme implemented in the online survey will be used to allocate physicians to the experimental or control arm, then stratified by medical specialty. The primary outcome will be fully appropriate prescription of oral ATs i.e that comply with the guidelines in terms of number of drugs, drug class, dosage and duration. To demonstrate a 5% increase in this proportion, we will need to include a minimum of 230 physicians per arm. A logistic mixed model with a clinical vignette-effect and a physician-effect nested in the arm of the study will be used.

**Ethics and dissemination:** The *Institutional Review Board* of Inserm (IRB00003888) approved our research project (no. 18-492). If the prescription support-tool improves the prescription of oral ATs, we will create an interactive web tool and will assess its impact in terms of clinical outcomes in real-life.

(ClinicalTrials.gov ID: NCT03630874)

### **Article summary: strengths and limitations of this study**

- Strengths:
  - This is a national, multicenter, randomized controlled study to evaluate the impact of a new and innovative prescription support-tool for chronic management of oral antithrombotic prescriptions (single, dual or triple therapy).
  - A scientific committee and an expert committee have developed and validated 30 clinical vignettes that we will use to evaluate the prescription support-tool.
- Limitations:
  - Selected physicians may not be representative of general practitioners or cardiologists because they are volunteers.
  - Non-access to the prescription support-tool in the control arm cannot be completely guaranteed (contamination bias).
  - The study will be undertaken in France, which could limit generalizability.

## INTRODUCTION

Antithrombotic (AT) drugs, which include antiplatelet (AP) and anticoagulant (AC) therapies, are used to prevent and treat many cardiovascular disorders.[1] With the increase in prevalence of cardiovascular diseases and medical progress, these treatments are increasingly being prescribed all around the world.[1] Furthermore, ATs are the most frequent drug class implicated in serious and fatal adverse drug events (ADEs), particularly bleeding events,[2,3] among which 70% could be preventable.[4]

AT combinations (dual or triple AT therapy) greatly increase this risk. For example, Hansen et al. reported a 3.1-fold higher risk of fatal and non-fatal bleeding with dual warfarin and clopidogrel therapy and a 3.7-fold higher risk with triple therapy (warfarin, aspirin and clopidogrel) than warfarin monotherapy in patients with non-valvular atrial fibrillation.[5] So far, no study has evaluated the rate of prescriptions of AT combinations not complying with guidelines for adults, taking into account the drugs prescribed but also the dosage and duration of the prescription. Although tools assessing inappropriate prescribing such as the Beers or STOPP/START criteria[6,7] have a section dedicated to ATs, they mention only a few conditions for prescribing AT combinations and are relevant to older people only. Only one Canadian cohort study was specifically designed to assess the appropriateness of AT combinations in adults.[8] It concluded that approximately 15% of patients with AT combinations had inappropriate dual or triple oral AT therapy. However, the appropriateness of the prescribing was limited to the type of drugs combined and did not cover duration and dosage.

To assess the appropriateness of prescribing oral AT combinations (considering number of drugs, type of drugs, dosage and duration at the same time) in a French cohort of adults, we performed a systematic review of international guidelines (2012-2018) to define which oral AT combination is recommended, when and for how long.[9] Guidelines dealing with oral



1  
2  
3 AT combinations were numerous (n=70) and none encompassed all the clinical situations  
4 requiring oral AT combinations. This review highlighted the difficulty for a physician to  
5 quickly find the most up-to-date recommendation and the one most relevant to the patient's  
6 clinical situation. These findings, agreed with clinical experience, led us to synthesize all the  
7 recommendations into a prescription support-tool (**Figure 1**)[9] to help physicians prescribe  
8 oral AT combinations.  
9

10  
11  
12 Our hypothesis is that this prescription support-tool would improve the prescription of oral  
13 ATs to comply with guidelines. Our primary objective is to assess the impact of this tool on  
14 improving the prescription of oral ATs to comply with guidelines (in terms of number of  
15 drugs, drug class, dosage and duration at the same time).  
16  
17  
18  
19  
20  
21  
22  
23  
24  
25  
26  
27

## 28 **METHODS AND ANALYSIS**

### 29 **Study design, study setting and eligibility criteria**

30  
31  
32 A web-based, open randomized controlled trial involving clinical vignettes will be performed  
33 in France via an online survey. This study will be conducted among French general  
34 practitioners and cardiologists involved in outpatient settings. Physicians with an exclusive  
35 hospital practice will not be eligible.  
36  
37  
38  
39  
40  
41

42 Physicians will be identified and contacted to participate in the online survey by email via  
43 physician associations, social networks or word of mouth. The survey will gather  
44 informations on physicians' characteristics, including age, sex, medical specialty (cardiologist  
45 or general practitioner), place of exercise (hospital or ambulatory setting), years of medical  
46 practice, approximate proportion of patients prescribed oral AT combinations in their practice  
47 ( $\leq 5\%$ , 6 – 10%, 11-20% or  $\geq 21\%$ ), whether physicians feel comfortable or not with  
48 management of oral AT prescriptions (totally, partially, rarely, never), and whether physicians  
49 know where to find the most recent guidelines on oral AT prescriptions. Then, physicians will  
50  
51  
52  
53  
54  
55  
56  
57  
58  
59  
60

1  
2  
3 be randomized to 2 arms: the experimental arm, having access to the prescription support-tool  
4 **(Figure 1),**[9] and the control arm, with no prescription support-tool. For physicians in the  
5  
6 **(Appendix 1),**[9] both downloaded (or just viewed) online in pdf format. Then, participants  
7  
8 from both arms will be presented 3 different clinical vignettes illustrating outpatient clinical  
9  
10 situations and will be asked to propose prescriptions for each clinical vignette (oral AT or not,  
11  
12 number of oral ATs, type of oral ATs, dosage of each oral AT and duration of the  
13  
14 prescription) by answering 4 multiple-choice questions (each question on a separate web  
15  
16 page). Question 5 will evaluate the degree of confidence of physicians have that their  
17  
18 prescription of ATs complies with guidelines on a scale of 0 to 10. Physicians in the  
19  
20 experimental arm will answer each question with the help of the tool, downloadable (or  
21  
22 viewable on each page). At the end, we will ask to physicians of the experimental arm to rate,  
23  
24 on a scale from 0 and 10, the usefulness of the prescription support-tool, how much they  
25  
26 would be willing to use this prescription support-tool in their practice and if they would  
27  
28 recommend its use. Physicians in the control arm will be asked to answer according to their  
29  
30 actual clinical practice as closely as possible. Once the answer is given, physicians cannot go  
31  
32 back or change their answers. Physicians must answer the questions consecutively; however,  
33  
34 they will be allowed to stop and continue at any time (on the same computer). Physicians  
35  
36 from the control arm will be able to download the prescription support-tool once they have  
37  
38 completed their answers for the 3 clinical vignettes.  
39  
40  
41  
42  
43  
44  
45  
46  
47  
48

49 The scientific and expert committee have created and validated 30 clinical vignettes. To  
50  
51 ensure that each clinical vignette will be read the same number of times in both arms, we  
52  
53 created 2 randomized lists of clinical vignettes in blocks of 30 (one list per trial arm). Clinical  
54  
55 vignettes will then be allocated consecutively 3 by 3 to each physician, according to the arm  
56  
57 in which he/she was randomized. Therefore, in each arm, for every 10 physicians randomized,  
58  
59  
60

1  
2  
3 all clinical vignettes will be read once. The randomization unit will be the physician and the  
4 unit of analysis the clinical vignette. Three clinical vignettes per physician was a middle  
5 ground to ensure the feasibility of the study considering both participants' availability  
6 (acceptable time to complete the clinical vignettes) and statistical need (number of clinical  
7 vignettes needed). To maximize the participation rate, physicians will be sent reminders every  
8 20 days.  
9

### 16 **Outcomes**

17  
18 The primary outcome is prescription of oral ATs that comply with guidelines in terms of  
19 number of drugs, drug class, dosage and duration at the same time, which will be termed fully  
20 appropriate prescription. An expert committee will determine the correct answer, based on the  
21 prescription support-tool (**Figure 1**)[9]. Secondary outcomes are (1) prescription of oral ATs  
22 that comply with guidelines in terms of number of drugs, drug class, dosage and duration,  
23 each assessed separately; (2) prescription of oral ATs that comply with guidelines (fully  
24 appropriate prescription, number of drugs, drug class, duration and dosage each assessed  
25 separately) by medical specialty of physicians responding (cardiologist or general  
26 practitioner); (3) the degree of confidence of physicians have that their prescription of ATs  
27 complies with guidelines; 4) for physicians allocated to receive the prescription support-tool  
28 only, the overall usefulness of the tool.  
29  
30  
31  
32  
33  
34  
35  
36  
37  
38  
39  
40  
41  
42  
43

### 44 **Intervention**

45  
46 We developed, from a systematic review of international guidelines published between 2012  
47 and 2018,[9] a prescription support-tool to help physicians prescribe oral AT combinations  
48 for complying with guidelines. This prescription support-tool synthesizes, on a double-sided  
49 page, selected international guidelines on chronic management (at least 1 month) of oral AT  
50 combinations (indication, drugs, dosages and duration) in adults, without considering in-  
51 hospital management and bridging therapy (**Figure 1**).[9] We excluded particular clinical  
52  
53  
54  
55  
56  
57  
58  
59  
60

1  
2  
3 situations that require inevitably specialist medical advice: active cancer, autoimmune  
4 diseases, haemophilia, HIV, paediatrics and pregnancy. The following pathologies were  
5 included in this tool because they are the main causes leading to the prescription of ATs  
6 (single, dual or triple therapy) in adults[1]: non-valvular atrial fibrillation, coronary artery  
7 disease, ischemic stroke, valvular heart disease, peripheral artery disease and venous  
8 thromboembolism. Therefore, this tool covers prevention of ischemic and /or embolic events  
9 in patients with a history of coronary disease (stable coronary disease or acute coronary  
10 syndrome), non-valvular atrial fibrillation, peripheral artery disease, venous  
11 thromboembolism disease, ischemic stroke (and transient ischemic attack) and/or valvular  
12 heart disease (bioprosthesis, mechanical valve and transcatheter aortic valve replacement).  
13 It does not cover primary prevention in other scenarios such as patients without those  
14 conditions but at low or high-risk for ischemic events (**Figure 1**).[9] Our tool also specifies  
15 the type of oral ATs that should never be combined (combinations of oral anticoagulants  
16 [OACs], combinations of P2Y12 inhibitors or combining one OAC with one potent P2Y12  
17 inhibitor, namely ticagrelor or prasugrel), the clinical situations in which oral AT  
18 combinations are never indicated and the contraindications of ATs. This prescription support-  
19 tool aims to give physicians quick access to the recommendation that fits most of their  
20 patient's clinical situation. The prescription support-tool is accompanied by an explanatory  
21 guide (how to read and use the tool, with examples, **Appendix 1**).[9]

### 46 **Clinical vignettes**

47  
48 The clinical vignettes illustrating plausible clinical situations have been developed to reflect  
49 clinical practice.[10,11] Such an approach has been found valid in measuring quality of  
50 care.[12,13] Each clinical vignette corresponds to a specific situation for which physicians  
51 will have to indicate, by answering a multiple-choice question, whether they would prescribe  
52 oral ATs, with the number, type, dosage and duration. All answers to clinical vignettes'

1  
2  
3 questions can be found in the prescription support-tool. An example of a clinical vignette is  
4 presented in **Appendix 2**. Two physicians (1 cardiologist and 1 internist-geriatrician) from the  
5 scientific committee have created 30 clinical vignettes covering most outpatient clinical  
6 situations (without considering in-hospital management and bridging therapy) for which the  
7 long-term use of oral ATs (single, dual or triple therapy) is recommended or needs to be  
8 stopped according to the guidelines.  
9

### 16 **Randomization**

17  
18 Physicians will be allocated to the two arms in blocks of 4 by use of a computer-generated  
19 randomization scheme implemented in the online survey (1:1 ratio), then stratified by their  
20 medical specialty.  
21  
22  
23  
24  
25

### 26 **Data collection methods and data management**

27  
28 Data from physicians' answers will be automatically integrated in a database for statistical  
29 analysis. The data will be completely anonymous. In particular, neither the physician's name  
30 nor email address will be collected (there will be no login for participants). There is no  
31 planned follow-up in this trial.  
32  
33  
34  
35  
36

### 37 **Sample size and statistical considerations**

38  
39 Considering that 85% of AT prescriptions fully comply with guidelines in the control arm,<sup>[8]</sup>  
40 to demonstrate an increase in this proportion up to 90% in the experimental arm, we need to  
41 include (for a power of 80% and an alpha risk of 5%) a minimum of 229 physicians per arm.  
42 To obtain a multiple of 10 physicians (because each physician will complete 3 of 30 clinical  
43 vignettes and to have all clinical vignettes completed the same number of times in each arm),  
44 we plan to include at least 230 physicians per arm. However, if more physicians participate,  
45 all collected data will be considered. For each clinical vignette, we will consider that  
46 prescription is fully appropriate (versus inappropriate) if answers to each of the first four  
47 questions (number of drugs, drug class, dosage and duration) comply with the guidelines. To  
48  
49  
50  
51  
52  
53  
54  
55  
56  
57  
58  
59  
60

1  
2  
3 compare the percentage of fully appropriate prescriptions between the two randomized arms,  
4 taking into account that each participant intends to complete 3 clinical vignettes, we will use a  
5 logistic mixed model with a clinical-vignette effect and a physician-effect nested in the trial  
6 arm. We will use the same method to compare the percentage of prescriptions of oral ATs that  
7 comply with guidelines in terms of number of drugs, drug class, duration and dosage, each  
8 assessed separately, between the two randomized arms (secondary analyses). To compare the  
9 degree of confidence that physicians have that their prescription of oral AT combinations  
10 complies with guidelines (quantitative variable: scale from 0 and 10), taking into account that  
11 each participant intends to complete 3 clinical vignettes, we will use a linear mixed model  
12 with a clinical-vignette effect and a physician-effect nested in the trial arm. A sub-group  
13 analysis for general practitioners and for cardiologist will be done. Finally, to assess the  
14 overall usefulness of the tool, we will describe the data of the experimental arm (mean  $\pm$  SD,  
15 median (25–75 interquartile range)). All analyses will involve use of R v3.5.2 ([www.cran.r-](http://www.cran.r-project.org)  
16 [project.org](http://www.cran.r-project.org)).

### 35 **Scientific and expert committees**

37 Our study involves a scientific committee and an expert committee. The scientific committee  
38 consists of a cardiologist, 2 internist-geriatricians, a general practitioner and 2  
39 epidemiologists. The scientific committee designed the study protocol, created and validated  
40 the clinical vignettes and will be responsible for data analysis and writing of the manuscript.  
41 The expert committee consists of a cardiologist, a geriatrician, an internist and 2 general  
42 practitioners (medical specialties that often deal with patients needing chronic oral AT  
43 prescriptions). The expert committee had to review all clinical vignettes with the prescription  
44 support-tool (external validation) to confirm the agreement of the clinical vignettes with  
45 clinical practice and their readability. The committee estimated the time needed to complete 3  
46 clinical vignettes at 10 minutes.

## Patient and Public Involvement

Patients and/or the public have not been involved in the development of the research or in the study design because only physicians will be enrolled and they will not care for patients in the context of this trial; they will just complete clinical vignettes.

## ETHICS AND DISSEMINATION

The ethics evaluation committee of Inserm, the *Institutional Review Board* (IRB00003888) approved our research project (no. 18-492). If the prescription support-tool is associated with improving the prescription of oral ATs to comply with guidelines, it will be disseminated to help improve ATs prescriptions. We will create an interactive web tool to improve the ergonomics of the tool and to facilitate the updates. We will assess the impact of this interactive web tool in terms of clinical outcomes in real life. This will be the second step, but we feel that we must first demonstrate that the use of the prescription support-tool (on paper) is associated with better prescription appropriateness before launching a trial involving patients with clinical outcomes. Results of this trial will be disseminated in a paper submitted to a peer-reviewed journal and presentations at relevant conferences.

**Figure 1 legend:** 2019 synthesis of recommendations for chronic management of antithrombotic combinations

1  
2  
3 **Acknowledgements:** We thank Sebastien Zerah who designed the online survey. We thank  
4  
5 Laura Smales (BioMedEditing) for English editing  
6

7 **Authors' contributions:** LZ, DBZ, AD and FT designed the study. YDR designed the  
8  
9 statistical analysis. LZ and MHM designed the clinical vignettes. PF, AMM, EP, PC and JPC  
10  
11 reviewed the clinical vignettes. LZ, DBZ, MHM, AD and FT validated the clinical vignettes.  
12  
13 LZ drafted and prepared the manuscript for publication. All authors re-read and corrected the  
14  
15 manuscript. All authors approved the final manuscript.  
16  
17

18  
19 **Funding statement:** This work was supported by Sorbonne Université (PhD grant).  
20

21 **Competing interests:** None.  
22

23  
24 **Ethics approval:** The ethics evaluation committee of Inserm, the *Institutional Review Board*  
25  
26 (IRB00003888) reviewed and approved our research project on 06/12/2018 (no. 18-492). The  
27  
28 ethics evaluation committee of Inserm reviewed and approved a revised version of the  
29  
30 protocol on 10/03/18 (no. 18-492 bis) to allow us to communicate our trial via social networks  
31  
32 or word of mouth.  
33  
34

35 **Trial registration:** ClinicalTrials.gov ID: NCT03630874.  
36

37 **The study start date is November 2018.**  
38

39  
40 **Data sharing statement:** The manuscript is a protocol for a randomized controlled trial,  
41  
42 which does not include data.  
43

44  
45 **Open access:** This is an open access article distributed in accordance with the Creative  
46  
47 Commons Attribution Non Commercial (CC BY-NC 4.0) license, which permits others to  
48  
49 distribute, remix, adapt, build upon this work non-commercially, and license their derivative  
50  
51 works on different terms, provided the original work is properly cited, appropriate credit is  
52  
53 given, any changes made indicated, and the use is non-commercial. See:  
54  
55 <http://creativecommons.org/licenses/by-nc/4.0/>.  
56  
57  
58  
59  
60



**REFERENCES**

1. Mega JL, Simon T. Pharmacology of antithrombotic drugs: an assessment of oral antiplatelet and anticoagulant treatments. *Lancet* 2015;**386**:281–91. doi:10.1016/S0140-6736(15)60243-4.
2. Patel NS, Patel TK, Patel PB, *et al.* Hospitalizations due to preventable adverse reactions—a systematic review. *Eur J Clin Pharmacol* 2017;**73**:385–98. doi:10.1007/s00228-016-2170-6.
3. Wester K, Jönsson AK, Spigset O, *et al.* Incidence of fatal adverse drug reactions: a population based study. *Brit J Clin Pharmacol* 2008;**65**:573–9. doi:10.1111/j.1365-2125.2007.03064.x.
4. Pirmohamed M, James S, Meakin S, *et al.* Adverse drug reactions as cause of admission to hospital: prospective analysis of 18 820 patients. *BMJ* 2004;**329**:15-19.
5. Hansen ML, Sørensen R, Clausen MT, *et al.* Risk of bleeding with single, dual, or triple therapy with warfarin, aspirin, and clopidogrel in patients with atrial fibrillation. *Arch Intern Med* 2010;**170**:1433–41. doi:10.1001/archinternmed.2010.271.
6. O'Mahony D, O'Sullivan D, Byrne S, *et al.* STOPP/START criteria for potentially inappropriate prescribing in older people: version 2. *Age Ageing* 2014;**44**:213-218. doi:10.1093/ageing/afu145.
7. By the American Geriatrics Society 2015 Beers Criteria Update Expert Panel. American Geriatrics Society 2015 updated beers criteria for potentially inappropriate medication use in older adults. *J Am Geriatr Soc* 2015;**63**:2227-2246. doi:10.1111/jgs.13702.
8. Hamilton K, Davis C, Falk J, *et al.* Assessing prescribing of NSAIDs, antiplatelets, and anticoagulants in Canadian family medicine using chart review. *Int J Clin Pharm* 2016;**38**:1094–1102. doi: 10.1007/s11096-016-0335-0.
9. Zerah L, Bun RS, Guillo S, *et al.* A prescription support-tool for chronic management of oral antithrombotic combinations in adults based on a systematic review of international guidelines. *PLoS One* 2019;**14**:e0211695. doi: 10.1371/journal.pone.0211695.
10. Engel J, van der Wulp I, Poldervaart JM, *et al.* Clinical decision-making of cardiologists regarding admission and treatment of patients with suspected unstable angina or non-ST-elevation myocardial infarction: protocol of a clinical vignette study. *BMJ Open* 2015;**5**:e006441. doi: 10.1136/bmjopen-2014-006441.
11. Bachmann LM, Mühleisen A, Bock A, *et al.* Vignette studies of medical choice and judgement to study caregivers' medical decision behaviour: systematic review. *BMC Med Res Methodol* 2008;**8**:50. doi: 10.1186/1471-2288-8-50.
12. Peabody JW, Luck J, Glassman P, *et al.* Comparison of vignettes, standardized patients, and chart abstraction: a prospective validation study of 3 methods for measuring quality. *JAMA* 2000;**283**:1715-1722.

- 1  
2  
3 13. Peabody JW, Luck J, Glassman P, *et al.* Measuring the quality of physician practice by  
4 using clinical vignettes: a prospective validation study. *Ann Intern Med* 2004;**141**:771-  
5 780.  
6  
7  
8  
9  
10  
11  
12  
13  
14  
15  
16  
17  
18  
19  
20  
21  
22  
23  
24  
25  
26  
27  
28  
29  
30  
31  
32  
33  
34  
35  
36  
37  
38  
39  
40  
41  
42  
43  
44  
45  
46  
47  
48  
49  
50  
51  
52  
53  
54  
55  
56  
57  
58  
59  
60

For peer review only



# How to use the prescription support tool

1  
2  
3  
4  
5  
6  
7  
8  
9  
10  
11  
12  
13  
14  
15  
16  
17  
18  
19  
20  
21  
22  
23  
24  
25  
26  
27  
28  
29  
30  
31  
32  
33  
34  
35  
36  
37  
38  
39  
40  
41

# General presentation of the prescription support tool

Colour codes for single, dual or triple therapy

Codes for duration of treatments

2019 SYNTHESIS OF RECOMMENDATIONS FOR CHRONIC MANAGEMENT OF ANTITHROMBOTIC COMBINATIONS INDICATIONS, DURATION AND DOSAGE IN ADULTS

|           |                                                               |
|-----------|---------------------------------------------------------------|
| SINGLE    | Single Therapy: Antiplatelet (SAPT) or Anticoagulation (SACT) |
| DUAL SAPT | Dual Antiplatelet Therapy (DAPT)                              |
| DUAL      | Dual Therapy (SAPT + SACT)                                    |
| TRIPLE    | Triple Therapy (DAPT + SACT)                                  |

|                        |                                                                                               |
|------------------------|-----------------------------------------------------------------------------------------------|
| THErapy 1 or THErapy 2 | Modulation between two therapies depending on patient condition (according to striped colors) |
|                        | Minimum therapy duration                                                                      |
|                        | Maximum therapy duration                                                                      |
|                        | Recommended therapy duration                                                                  |

Abbreviations

**ABCD<sup>2</sup>** score for TIA  
 Clinical features of the TIA (unilateral weakness (+2), speech disturbance without weakness (+1), other symptoms (0))  
 Duration of symptoms (< 10 min (0), 10-59 min (+1), ≥60 min (+2))  
 BP ≥ 140/90 mmHg (+1)    Diabetes (+1)

**ACS** Acute Coronary Syndrome  
**Aspl** Aspirin  
**BMS** Bare-Metal Stent  
**CABG** Coronary Artery By Pass Graft  
**CHA2DS2-VASc** C Congestive Heart failure (+1)  
 H Hypertension (+1)    A2 Age ≥ 75 (+2)  
 D Diabetes Mellitus (+1)    S2 Prior stroke or TIA/thromboembolism (+1)  
 V Vascular disease (+1)    A Age 65-74 (+1)

Dosage of antithrombotic drugs

**Aspirin:** 75-100 mg/day  
**Aspirin/dipyridamol:** 25/200 mg twice a day  
**Aspirin/ticlopidogrel:** 75 mg/day  
**Aspirin/prasugrel:** 10 mg/day (5 mg/day in patients with body weight < 60 kg)  
 Contraindications for prasugrel: previous intracranial haemorrhage, previous ischaemic stroke or transient ischaemic attack, or ongoing bleeds; prasugrel is not recommended for patients >75 years of age or with a body weight <60 kg  
**Ticlopidogrel:** 90 mg twice a day  
 Contraindications for ticagrelor: previous intracranial haemorrhage or ongoing bleeds.  
**Rivaroxaban:** 600 mg/day  
 3 for NV-AF, VTE, LV thrombus

**! Dual or triple anti-thrombotic therapies are NEVER recommended in:**

- NV-AF CHA2DS2-VASc score ≥ 2 for male and ≥ 3 for female and/or VTE\* (including cerebral venous thrombosis and post-embolic pulmonary hypertension) and/or mechanical heart valve:
  - isolated
  - associated with:
    - ischaemic stroke
    - and/or LEAD without recent revascularisation procedure
    - and/or carotid or vertebral stenosis without stent
    - and/or coronary artery disease without recent invasive procedure or acute syndrome
    - and/or bioprostheses
- Embolism ischaemic stroke
- Recurrent stroke despite SAPT
- Mitral stenosis and previous stroke or left atrial thrombus
- Carotid or vertebral stenosis (except with stent) } Indications for SAPT
- Carotid or vertebral dissection } SAPT or SACT. 3-6 month
- Valvular bioprostheses } 3-6 months of SACT (SAPT for patients with aortic bioprostheses at high risk of bleeding)

**Indications for SACT**

**Combinations of anti-thrombotic drugs NEVER recommended:**

- 2 OAC (except in switches)
- 2 P2Y12 inhibitors (= Clopidogrel, Ticagrelor, Prasugrel)
- OAC + Ticagrelor or Prasugrel
- DOA are contraindicated in patients with a mechanical valve

Clinical situations for which a single antithrombotic treatment is recommended (NEVER a combination)

Combinations of antithrombotic drugs NEVER recommended

Recommended dosages for each drug

Abbreviations used in the tool

CLINICAL SITUATIONS NOT FOUND IN THIS TOOL, NEED A SPECIALIST'S OP

|          |                                                                                                                                                                                                                                                           |
|----------|-----------------------------------------------------------------------------------------------------------------------------------------------------------------------------------------------------------------------------------------------------------|
| Clopi    | Clopidogrel                                                                                                                                                                                                                                               |
| CTLI     | Chronic Limb-Threatening Ischemia                                                                                                                                                                                                                         |
| DAPT     | Dual Antiplatelet Therapy                                                                                                                                                                                                                                 |
| DCB      | Drug-Coated Balloon                                                                                                                                                                                                                                       |
| DES      | Drug-Eluting Stent                                                                                                                                                                                                                                        |
| DOA      | Direct Oral Anticoagulant                                                                                                                                                                                                                                 |
| DUAL     | Dual Therapy: SAPT + SACT                                                                                                                                                                                                                                 |
| HAS BLED | Abnormal renal (+1) or liver function (+2)<br>Hypertension (+1)    Stroke history (+1)<br>Prior major Bleeding or predisposition to bleeding (+1)<br>Labile INR (+1)    Elderly > 65 (+1)<br>Drugs (concomitant Aspl, Clopi, NSAIDs (+1)) or alcohol (+2) |
| INR      | International Normalized Ratio                                                                                                                                                                                                                            |
| LEAD     | Lower Extremity Artery Disease                                                                                                                                                                                                                            |
| LV       | Left Ventricular                                                                                                                                                                                                                                          |
| NIHSS    | National Institutes of Health Stroke Scale                                                                                                                                                                                                                |
| NSTE-ACS | Non-ST Elevation Acute Coronary Syndrome                                                                                                                                                                                                                  |
| NV-AF    | Non-valvular atrial fibrillation                                                                                                                                                                                                                          |
| OAC      | Oral Anticoagulation: VKA or DOA                                                                                                                                                                                                                          |
| PCI      | Percutaneous coronary intervention (= DES, BMS or DCB)                                                                                                                                                                                                    |
| Prasu    | Prasugrel                                                                                                                                                                                                                                                 |
| SAPT     | Single Antiplatelet Therapy                                                                                                                                                                                                                               |
| SACT     | Single Anticoagulation Therapy                                                                                                                                                                                                                            |
| SIHD     | Stable Ischaemic Heart Disease                                                                                                                                                                                                                            |
| STEMI    | ST-Elevation Myocardial Infarction                                                                                                                                                                                                                        |
| TAVR     | Transcatheter Aortic Valve Replacement                                                                                                                                                                                                                    |
| TIA      | Transient Ischaemic Attack                                                                                                                                                                                                                                |
| Tica     | Ticagrelor                                                                                                                                                                                                                                                |
| Trifu    | Trifluralin                                                                                                                                                                                                                                               |
| TRIPLE   | Triple Therapy: DAPT + SACT                                                                                                                                                                                                                               |
| VKA      | Vitamin K Antagonist Transcatheter Aortic Valve                                                                                                                                                                                                           |
| VTE      | Venous Thromboembolism                                                                                                                                                                                                                                    |

Target INR for mechanical valves

**TARGET INR FOR MECHANICAL PROSTHESE** Patient-related risk factor\*

| Prosthesis thromboembolism | None | ≥1  |
|----------------------------|------|-----|
| Low <sup>†</sup>           | 2.5  | 3.0 |
| Medium <sup>‡</sup>        | 3.0  | 3.5 |
| High <sup>§</sup>          | 3.5  | 4.0 |

INR = international normalized ratio, DEF = left ventricular ejection fraction  
 \* Mitral or tricuspid valve replacement, previous thrombotic atrial fibrillation, mitral stenosis of any degree, LVF, etc.  
 † Carbomedics, Medtronic Hall, AFS, Medtronic Pro, St-Jude Medical, On-X, Sorin Bicarbon  
 ‡ Other bileaflet valve with insufficiently closed AVA  
 § Lillehei-Kaster, Omniscience, Edwards (ball-cage), Björk-Shiley and other tilting-disc valves

**THE COCKCROFT AND GAULT FORMULA (1973)**  
 $Cr_{cl} = \frac{[(140 - \text{Age}) \times \text{Weight}] / (72 \times S_{cr}) \times 0.85 \text{ (if female)}}{1.73}$   
 $Cr_{cl}$  (creatinine clearance) = mL/minute  
 Age = years    Weight = kg    S<sub>cr</sub> (serum creatinine) = mg/dL

**IF BLEEDING DURING DAPT, follow these recommendations (Aurep, 2019):**  
<https://www.escardio.org/Guidelines/Clinical-Practice-Guidelines/2019-2020/antithrombotic-therapy-in-atrial-fibrillation>

**SPECIFIC CONDITIONS REQUIRING SYSTEMATICALLY AN IN-HOSPITAL SPECIALIST HAVE BEEN EXCLUDED:** cancer, auto-immune disease, hemophilia, human immunodeficiency virus (HIV), pediatrics and pregnancy and in-hospital prescriptions (including bridging therapy, perioperative therapy, and treatment of acute phase of cardiovascular disease)

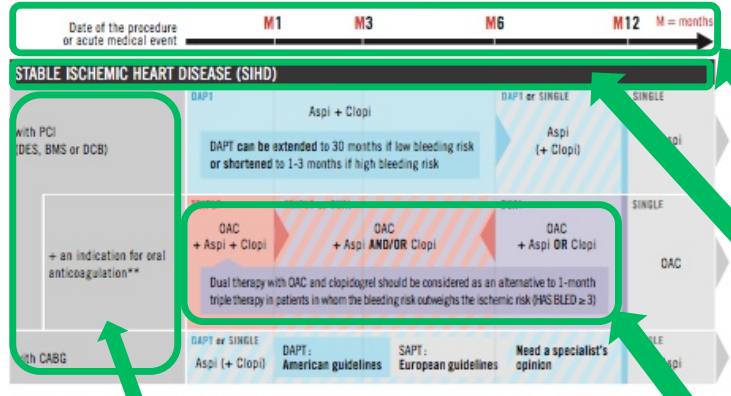

Timeline (in months) since diagnosis or beginning of treatment

Pathology

Time dependant recommended treatments

Link for recommendations if bleeding during DAPT

Specific conditions not included in the tool

Cockcroft and Gault formula

Treatments performed +/- association with another pathology that may influence antithrombotic treatment

# In practice

## Example 1: one cardiovascular disease

1  
2  
3  
4  
5  
6  
7  
8  
9  
10  
11  
12  
13  
14  
15  
16  
17  
18  
19  
20  
21  
22  
23  
24  
25  
26  
27  
28  
29  
30  
31  
32  
33  
34  
35  
36  
37  
38  
39  
40  
41

- 1
  - 2
  - 3
  - 4
  - 5
  - 6
  - 7
  - 8
  - 9
  - 10
  - 11
  - 12
  - 13
  - 14
  - 15
  - 16
  - 17
  - 18
  - 19
  - 20
  - 21
  - 22
  - 23
  - 24
  - 25
  - 26
  - 27
  - 28
  - 29
  - 30
  - 31
  - 32
  - 33
  - 34
  - 35
  - 36
  - 37
  - 38
  - 39
  - 40
  - 41
- At your medical consultation, you meet Mr R, 85 years old (weight: 81 kg, body mass index: 24 kg/m<sup>2</sup>).
  - Medical history: arterial hypertension and Parkinson disease
  - He had surgery 8 months ago for an aortic stenosis: transcatheter aortic valve replacement (TAVR)
  - Which antithrombotic therapy is recommended in this clinical situation?



1- Locate in the chapter headings of the tool, the cardiovascular disease of your patient



\*Indication for OAC: Mechanical heart valve prosthesis, NV-AF or flutter with CHA2DS2-VASc score  $\geq 2$  for men and  $\geq 3$  for female. Oral anticoagulation therapy to prevent thromboembolism should be considered in male AF patients with a CHA2DS2-VASc score of 1 and in female AF patients with a CHA2DS2-VASc score of 2. For VTE disease, OAC should be continued for 3 months if there is a triggering factor, 3 to 6 months if it is idiopathic, and for long-term if it is recurrent or associated with a pathology at risk. Once the anticoagulant treatment is complete for VTE disease, the patient will be treated as a patient without indication for oral anticoagulation.

\*\* High risk for LV thrombus: Ejection Fraction < 40%, Anteroapical wall motion abnormality.

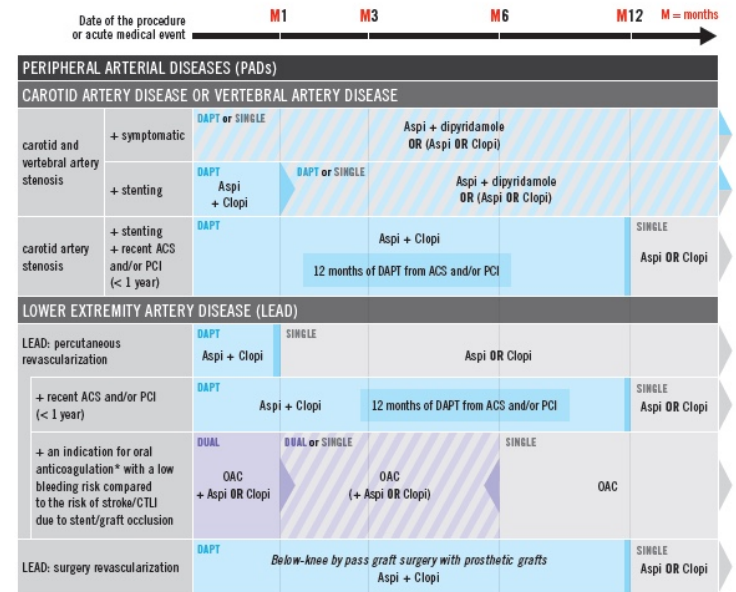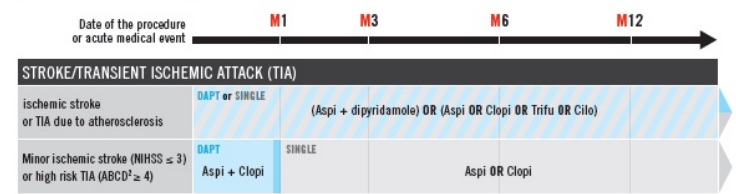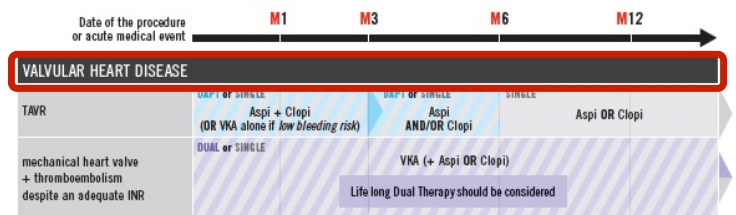

\*Indication for OAC: Mechanical heart valve prosthesis, NV-AF or flutter with CHA2DS2-VASc score  $\geq 2$  for men and  $\geq 3$  for female. Oral anticoagulation therapy to prevent thromboembolism should be considered in male AF patients with a CHA2DS2-VASc score of 1 and in female AF patients with a CHA2DS2-VASc score of 2. For VTE disease, OAC should be continued for 3 months if there is a triggering factor, 3 to 6 months if it is idiopathic, and for long-term if it is recurrent or associated with a pathology at risk. Once the anticoagulant treatment is complete for VTE disease, the patient will be treated as a patient without indication for oral anticoagulation.

1  
2  
3  
4  
5  
6  
7  
8  
9  
10  
11  
12  
13  
14  
15  
16  
17  
18  
19  
20  
21  
22  
23  
24  
25  
26  
27  
28  
29  
30  
31  
32  
33  
34  
35  
36  
37  
38  
39  
40  
41

2- Locate the precise clinical situation of your patient (treatment already performed, associated pathologies etc.)



\*Indication for OAC: Mechanical heart valve prosthesis, NV-AF or flutter with CHA2DS2-VASc score ≥ 2 for men and ≥ 3 for female. Oral anticoagulation therapy to prevent thromboembolism should be considered in male AF patients with a CHA2DS2-VASc score of 1 and in female AF patients with a CHA2DS2-VASc score of 2. For VTE disease, OAC should be continued for 3 months if there is a triggering factor, 3 to 6 months if it is idiopathic, and for long-term if it is recurrent or associated with a pathology at risk. Once the anticoagulant treatment is complete for VTE disease, the patient will be treated as a patient without indication for oral anticoagulation.

\*\* High risk for LV thrombus: Ejection Fraction < 40%, Anteroseptal wall motion abnormality.



\*Indication for OAC: Mechanical heart valve prosthesis, NV-AF or flutter with CHA2DS2-VASc score ≥ 2 for men and ≥ 3 for female. Oral anticoagulation therapy to prevent thromboembolism should be considered in male AF patients with a CHA2DS2-VASc score of 1 and in female AF patients with a CHA2DS2-VASc score of 2. For VTE disease, OAC should be continued for 3 months if there is a triggering factor, 3 to 6 months if it is idiopathic, and for long-term if it is recurrent or associated with a pathology at risk. Once the anticoagulant treatment is complete for VTE disease, the patient will be treated as a patient without indication for oral anticoagulation.

1  
2  
3  
4  
5  
6  
7  
8  
9  
10  
11  
12  
13  
14  
15  
16  
17  
18  
19  
20  
21  
22  
23  
24  
25  
26  
27  
28  
29  
30  
31  
32  
33  
34  
35  
36  
37  
38  
39  
40  
41

3- In the recommended treatment, find out where your patient is currently (here: 8 months)

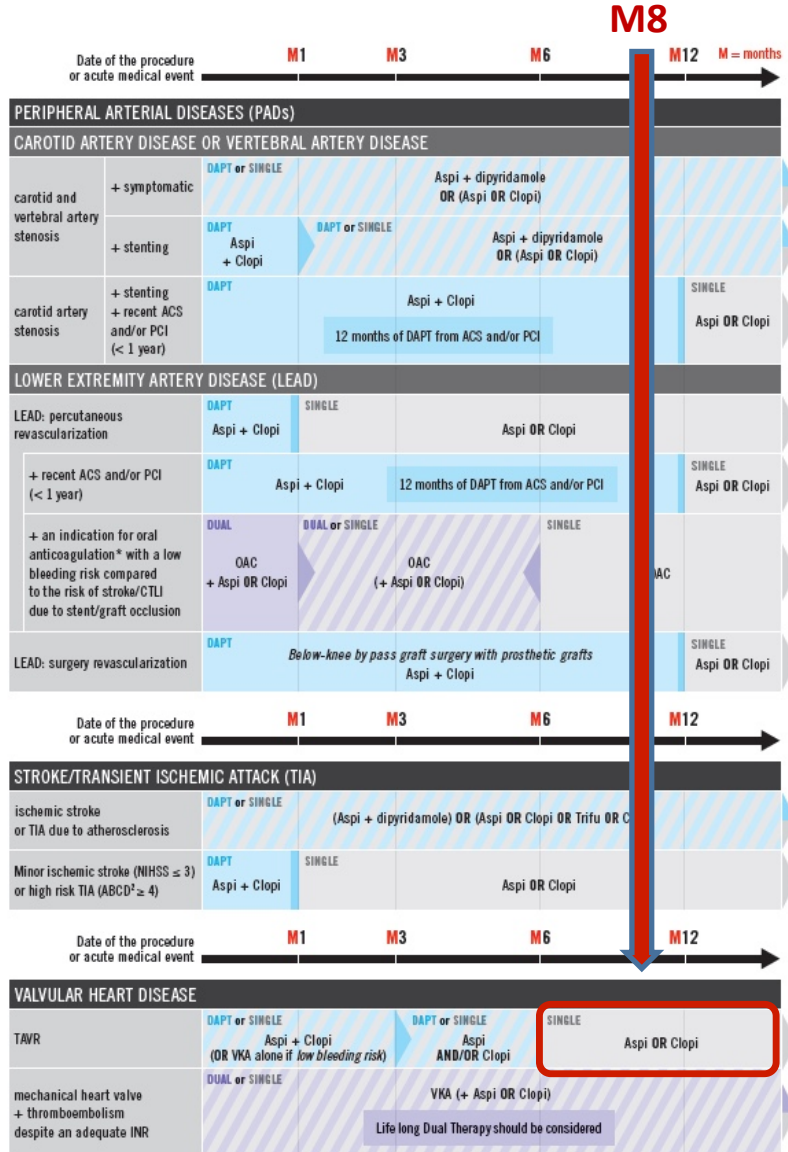

Long-term single antithrombotic therapy is recommended:  
1) Aspirin  
2) Clopidogrel

\*Indication for OAC: Mechanical heart valve prosthesis, NV-AF or flutter with CHA2DS2-VASC score ≥ 2 for men and ≥ 3 for female. Oral anticoagulation therapy to prevent thromboembolism should be considered in male AF patients with a CHA2DS2-VASC score of 1 and in female AF patients with a CHA2DS2-VASC score of 2. For VTE disease, OAC should be continued for 3 months if there is a triggering factor, 3 to 6 months if it is idiopathic, and for long-term if it is recurrent or associated with a pathology at risk. Once the anticoagulant treatment is complete for VTE disease, the patient will be treated as a patient without indication for oral anticoagulation.

1  
2  
3  
4  
5  
6  
7  
8  
9  
10  
11  
12  
13  
14  
15  
16  
17  
18  
19  
20  
21  
22  
23  
24  
25  
26  
27  
28  
29  
30  
31  
32  
33  
34  
35  
36  
37  
38  
39  
40  
41

4- Check the recommended dosage for the drugs you want to prescribe

CLINICAL SITUATIONS NOT FOUND IN THIS TOOL NEED A SPECIALIST'S OPINION

|          |                                                                  |
|----------|------------------------------------------------------------------|
| SINGLE   | Single Therapy:<br>Antiplatelet (SAPT) or Anticoagulation (SACT) |
| DUAL APT | Dual Antiplatelet Therapy (DAPT)                                 |
| DUAL     | Dual Therapy (SAPT + SACT)                                       |
| TRIPLE   | Triple Therapy (DAPT + SACT)                                     |

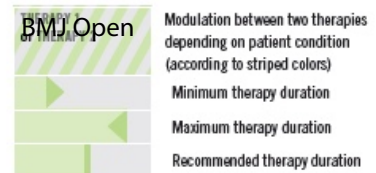

**Abbreviations**

- ABCD<sup>2</sup> score for TIA** Age ≥ 60 years (+1)  
 Clinical features of the TIA (unilateral weakness (+2), speech disturbance without weakness (+1), other symptoms (0))  
 Duration of symptoms (< 10 min (0), 10-59 min (+1), ≥ 60 min (+2))  
 BP ≥ 140/90 mmHg (+1) Diabetes (+1)
- ACS** Acute Coronary Syndrome  
**Aspi** Aspirin  
**BMS** Bare-Metal Stent  
**CABG** Coronary Artery By Pass Graft  
**CHA2DS2-VASc** C Congestive Heart failure (+1)  
 H Hypertension (+1) A2 Age ≥ 75 (+2)  
 D Diabetes Mellitus (+1) S2 Prior stroke or TIA/thromboembolism (+2)  
 V Vascular disease (+1) A Age 65-74 (+1)  
 Sc Sex category (i.e.: female sex) (+1)
- Cilo** Cilostazol  
**Clopi** Clopidogrel  
**CTLI** Chronic Limb-Threatening Ischemia  
**DAPT** Dual Antiplatelet Therapy  
**DCB** Drug-Coated Balloon  
**DES** Drug-Eluting Stent  
**DOA** Direct Oral Anticoagulant  
**DUAL** Dual Therapy: SAPT + SACT  
**HAS BLED** Abnormal renal / liver function (+1 or +2)  
 Hypertension (+1) Stroke history (+1)  
 Prior major Bleeding or predisposition to bleeding (+1)  
 Labile INR (+1) Elderly > 65 (+1)  
 Drugs (concomitant aspirin, clopidogrel, NSAIDs) or alcohol (+1 or +2)
- INR** International Normalized Ratio  
**LEAD** Lower Extremity Artery Disease  
**LV** Left Ventricular  
**NIHSS** National Institutes of Health Stroke Scale  
**NSTE-ACS** Non-ST Elevation Acute Coronary Syndrome  
**NV-AF** Non-valvular atrial fibrillation  
**OAC** Oral Anticoagulant: VKA or DOA  
**PCI** Percutaneous coronary intervention (= DES, BMS or DCB)  
**Prasugrel**  
**SAPT** Single Antiplatelet Therapy  
**SACT** Single Anticoagulation Therapy  
**SCAD** Stable coronary artery disease  
**STEMI** ST-Elevation Myocardial Infarction  
**TAVR** Transcatheter Aortic Valve Replacement  
**TIA** Transient Ischemic Attack  
**Tica** Ticagrelor  
**Triflu** Triflusal  
**TRIPLE** Triple Therapy: DAPT + SACT  
**VKA** Vitamin K Antagonist Transcatheter Aortic Valve  
**VTE** Venous Thromboembolism

**Dosage of antithrombotic drugs**

- Aspirin:** 75-100 mg/day  
**Aspirin/dipyridamole:** 25/200 mg twice a day  
**Cilostazol:** 100 mg twice a day  
**Clopidogrel:** 75 mg/day
- Prasugrel:** 10 mg/day (5 mg/day in patients with body weight < 60 kg)  
 Contraindications for prasugrel: previous intracranial haemorrhage, previous ischaemic stroke or transient ischaemic attack, or ongoing bleeds; prasugrel is not recommended for patients >75 years of age or with a body weight <60 kg.  
**Ticagrelor:** 90 mg twice a day  
 Contraindications for ticagrelor: previous intracranial haemorrhage or ongoing bleeds.  
**Triflusal:** 600 mg/day  
**VKA:** target INR 2-3 for NV-AF, VTE; LV thrombus  
**Rivaroxaban (Xarelto):**  
 • Venous thrombo-embolism (venous thrombosis/pulmonary embolism): D1 to D21: 15 mg x 2/day then from D22 onwards: 20 mg/day in a single take  
 • For the prevention of embolic stroke in patients with NV-AF: 20 mg/day in a single take  
 • No adjustment on weight, age, sex  
 • Renal failure  
 - Contraindication with creatinine clearance < 15 ml/min  
 - With creatinine clearance between 15-49 ml/min:  
 § NV-AF: 15 mg/day  
 § Venous thrombo-embolism: 15 mg x 2/day during the first three weeks then 20 mg/day in a single take  
 - No adjustment beyond a creatinine clearance > 50 ml/min  
**Apixaban (Eliquis):**  
 • For the prevention of embolic stroke in patients with NV-AF:  
 - 5 mg x 2/day  
 - NV-AF and at least two of the following: age ≥ 80 yo, weight ≤ 60 kg, serum creatinine ≥ 133 micromol/L: 2,5 mg x 2/day  
 - With creatinine clearance between 15-29 ml/min: 2,5 mg x 2/day  
 - Contraindication with creatinine clearance < 15 ml/min  
 • Venous thrombo-embolism (venous thrombosis/pulmonary embolism): D1 to D7: 10 mg x 2/day then from D8 onwards: 5 mg x 2/day  
**Dabigatran (Pradaxa):**  
 • For the prevention of embolic stroke in patients with NV-AF or VTE treatment, after treatment with a parenteral anticoagulant for at least 5 days: 150 mg x 2/day  
 • 110 mg x 2/day if:  
 § > 80 yo  
 § Patients also treated with Verapamil  
 § clearance between 30-50 ml/min  
 • Contraindication with creatinine clearance < 30 ml/min

- 1) Aspirin 75-100 mg/day  
 2) OR Clopidogrel 75 mg/day

**THE COCKCROFT AND GAULT FORMULA (1973)**  

$$C_{Cr} = \frac{((140 - \text{Age}) \times \text{Weight})}{(72 \times S_{Cr})} \times 0.85 \text{ (if female)}$$

$$C_{Cr} \text{ (creatinine clearance)} = \text{mL/minute}$$

$$\text{Age} = \text{years} \quad \text{Weight} = \text{kg} \quad S_{Cr} \text{ (serum creatinine)} = \text{mg/dL}$$

**IF BLEEDING DURING DAPT, follow these recommendations (figure 10):**  
<https://www.escardio.org/Guidelines/Clinical-Practice-Guidelines/2017-focused-update-on-dual-antiplatelet-therapy-dapt>

**SPECIFIC CONDITIONS REQUIRING SYSTEMATICALLY AN IN-HOSPITAL SPECIALIST HAVE BEEN EXCLUDED:** cancer, auto-immune disease, hemophilia, human immunodeficiency virus (HIV), pediatrics and pregnancy and In-hospital prescriptions (including bridging therapy, perioperative therapy, and treatment of acute phase of cardiovascular event)

| TARGET INR FOR MECHANICAL PROSTHESES | Patient-related risk factor <sup>a</sup> |     |
|--------------------------------------|------------------------------------------|-----|
| Prosthesis thrombogenicity           | None                                     | ≥1  |
| Low <sup>b</sup>                     | 2.5                                      | 3.0 |
| Medium <sup>c</sup>                  | 3.0                                      | 3.5 |
| High <sup>d</sup>                    | 3.5                                      | 4.0 |

INR = international normalized ratio; LVEF = left ventricular ejection fraction  
<sup>a</sup> Mitral or tricuspid valve replacement, previous thromboembolism; atrial fibrillation, mitral stenosis of any degree, LVEF < 35%  
<sup>b</sup> Carbomedics, Medtronic Hall, ATS, Medtronic Open-Pivot, St-Jude Medical, On-X, Four-Blade  
<sup>c</sup> Other bileaflet valve with insufficient data  
<sup>d</sup> Lillehei-Kaster, Omniscience, Starr-Edwards (ball-cage), Bjork Shiley and other tilting-disc valves

# In practice

## Example 2: two cardiovascular diseases

1  
2  
3  
4  
5  
6  
7  
8  
9  
10  
11  
12  
13  
14  
15  
16  
17  
18  
19  
20  
21  
22  
23  
24  
25  
26  
27  
28  
29  
30  
31  
32  
33  
34  
35  
36  
37  
38  
39  
40  
41

- 1
  - 2
  - 3
  - 4
  - 5
  - 6
  - 7
  - 8
  - 9
  - 10
  - 11
  - 12
  - 13
  - 14
  - 15
  - 16
  - 17
  - 18
  - 19
  - 20
  - 21
  - 22
  - 23
  - 24
  - 25
  - 26
  - 27
  - 28
  - 29
  - 30
  - 31
  - 32
  - 33
  - 34
  - 35
  - 36
  - 37
  - 38
  - 39
  - 40
  - 41
- At your medical consultation, you meet Mr V, 55 years old (weight: 81 kg, body mass index: 24 kg/m<sup>2</sup>).
  - Medical history: arterial hypertension (controlled), diabetes, renal failure (creatinine clearance with Cockcroft formula: 30 ml/min) and permanent non-valvular atrial fibrillation
  - He had an acute coronary syndrome 5 months ago with a percutaneous coronary intervention (PCI)
  - Which antithrombotic therapy is recommended in this clinical situation?

Date of the procedure or acute medical event **M1** **M3** **BMJ Open** **M12** **M = months**

| ACUTE/RECENT CORONARY SYNDROMES (ACS)                                                                                                                                                   |                                                                                                                                                                           |                                                                                                                                                                           |                               |               |
|-----------------------------------------------------------------------------------------------------------------------------------------------------------------------------------------|---------------------------------------------------------------------------------------------------------------------------------------------------------------------------|---------------------------------------------------------------------------------------------------------------------------------------------------------------------------|-------------------------------|---------------|
| NSTE-ACS or STEMI                                                                                                                                                                       |                                                                                                                                                                           |                                                                                                                                                                           |                               |               |
| medically managed                                                                                                                                                                       |                                                                                                                                                                           | DAPT                                                                                                                                                                      | Aspi + Tica OR Clopi          | SINGLE        |
|                                                                                                                                                                                         |                                                                                                                                                                           | DAPT can be extended up to 3 years in high ischaemic-risk patients who have tolerated DAPT without a bleeding complication or shortened to 6 months if high bleeding risk |                               |               |
| + an indication for oral anticoagulation*                                                                                                                                               | DUAL                                                                                                                                                                      | OAC + Aspi OR Clopi                                                                                                                                                       |                               | SINGLE<br>OAC |
| with PCI (DES, BMS, or DCB)                                                                                                                                                             |                                                                                                                                                                           | DAPT                                                                                                                                                                      | Aspi + Prasu OR Tica OR Clopi | MONO          |
|                                                                                                                                                                                         |                                                                                                                                                                           | DAPT can be extended up to 3 years in high ischaemic-risk patients who have tolerated DAPT without a bleeding complication or shortened to 6 months if high bleeding risk |                               |               |
| + an indication for oral anticoagulation*                                                                                                                                               | TRIPLE                                                                                                                                                                    | TRIPLE or DUAL                                                                                                                                                            | DUAL                          | SINGLE        |
|                                                                                                                                                                                         | OAC + Aspi + Clopi                                                                                                                                                        | OAC + Aspi AND/OR Clopi                                                                                                                                                   | OAC + Aspi OR Clopi           | OAC           |
| Dual therapy with OAC and clopidogrel should be considered as an alternative to 1-month triple therapy in patients in whom the bleeding risk outweighs the ischemic risk (HAS BLED ≥ 3) |                                                                                                                                                                           |                                                                                                                                                                           |                               |               |
| with CABG                                                                                                                                                                               |                                                                                                                                                                           | DAPT                                                                                                                                                                      | Aspi + Prasu OR Tica OR Clopi | SINGLE        |
|                                                                                                                                                                                         |                                                                                                                                                                           | DAPT can be extended up to 3 years in high ischaemic-risk patients who have tolerated DAPT without a bleeding complication or shortened to 6 months if high bleeding risk |                               |               |
| + an indication for oral anticoagulation*                                                                                                                                               | DUAL                                                                                                                                                                      | OAC + Aspi OR Clopi                                                                                                                                                       |                               | SINGLE<br>OAC |
| STEMI                                                                                                                                                                                   |                                                                                                                                                                           |                                                                                                                                                                           |                               |               |
| with fibrinolytic therapy                                                                                                                                                               |                                                                                                                                                                           | DAPT<br>Aspi + Clopi                                                                                                                                                      | DAPT or SINGLE                | SINGLE        |
|                                                                                                                                                                                         |                                                                                                                                                                           | Aspi (+ Clopi)                                                                                                                                                            |                               |               |
| + PCI (DES, BMS or DCB)                                                                                                                                                                 |                                                                                                                                                                           | DAPT                                                                                                                                                                      | Aspi + Clopi                  | SINGLE        |
|                                                                                                                                                                                         | DAPT can be extended up to 3 years in high ischaemic-risk patients who have tolerated DAPT without a bleeding complication or shortened to 6 months if high bleeding risk |                                                                                                                                                                           |                               | Aspi          |
| with LV thrombus or high risk of LV thrombus**                                                                                                                                          |                                                                                                                                                                           | DUAL                                                                                                                                                                      | VKA + Aspi OR Clopi           | SINGLE        |
|                                                                                                                                                                                         |                                                                                                                                                                           | Aspi + Prasu OR Tica OR Clopi                                                                                                                                             |                               |               |
| + PCI (DES, BMS or DCB)                                                                                                                                                                 | TRIPLE                                                                                                                                                                    | TRIPLE or DUAL                                                                                                                                                            | DAPT                          | SINGLE        |
|                                                                                                                                                                                         | VKA + Aspi + Clopi                                                                                                                                                        | Aspi + (VKA + Clopi) OR (Prasu OR Tica OR Clopi)                                                                                                                          | Aspi + Prasu OR Tica OR Clopi | Aspi          |

\* Indication for OAC: Mechanical heart valve prosthesis, NV-AF or flutter with CHA2DS2-VASc score ≥ 2 for men and ≥ 3 for female. Oral anticoagulation therapy to prevent thromboembolism should be considered in male AF patients with a CHA2DS2-VASc score of 1 and in female AF patients with CHA2DS2-VASc score of 2. For VTE disease, OAC should be continued for 3 months if there is a triggering factor, 3 to 6 months if it is idiopathic, and for long-term if it is recurrent or associated with a pathology at risk. Once the anticoagulant treatment is complete for VTE disease, the patient will be treated as a patient without indication for oral anticoagulation.

\*\* High risk for LV thrombus: Ejection Fraction < 40%, Anteroapical wall motion abnormality.

1- Locate in the chapter headings of the tool, the cardiovascular disease of your patient

| ACUTE/RECENT CORONARY SYNDROMES (ACS)                                                                                                                                                   |                                           | M1                                                                                                                                                                        | M3                                                                  | BMJ Open                      | M12                           | M = months |
|-----------------------------------------------------------------------------------------------------------------------------------------------------------------------------------------|-------------------------------------------|---------------------------------------------------------------------------------------------------------------------------------------------------------------------------|---------------------------------------------------------------------|-------------------------------|-------------------------------|------------|
| <b>NSTE-ACS or STEMI</b>                                                                                                                                                                |                                           |                                                                                                                                                                           |                                                                     |                               |                               |            |
| medically managed                                                                                                                                                                       |                                           | DAPT                                                                                                                                                                      | Aspi + Tica OR Clopi                                                |                               |                               | SINGLE     |
|                                                                                                                                                                                         |                                           | DAPT can be extended up to 3 years in high ischaemic-risk patients who have tolerated DAPT without a bleeding complication or shortened to 6 months if high bleeding risk |                                                                     |                               |                               | Aspi       |
|                                                                                                                                                                                         | + an indication for oral anticoagulation* | DUAL                                                                                                                                                                      | OAC + Aspi OR Clopi                                                 |                               |                               | SINGLE OAC |
| with PCI (DES, BMS, or DCB)                                                                                                                                                             |                                           | DAPT                                                                                                                                                                      | Aspi + Prasu OR Tica OR Clopi                                       |                               |                               | MONO       |
|                                                                                                                                                                                         |                                           | DAPT can be extended up to 3 years in high ischaemic-risk patients who have tolerated DAPT without a bleeding complication or shortened to 6 months if high bleeding risk |                                                                     |                               |                               | Aspi       |
|                                                                                                                                                                                         | + an indication for oral anticoagulation* | TRIPLE OAC + Aspi + Clopi                                                                                                                                                 | TRIPLE or DUAL OAC + Aspi AND/OR Clopi                              | DUAL OAC + Aspi OR Clopi      | SINGLE OAC                    |            |
| Dual therapy with OAC and clopidogrel should be considered as an alternative to 1-month triple therapy in patients in whom the bleeding risk outweighs the ischemic risk (HAS BLED ≥ 3) |                                           |                                                                                                                                                                           |                                                                     |                               |                               |            |
| with CABG                                                                                                                                                                               |                                           | DAPT                                                                                                                                                                      | Aspi + Prasu OR Tica OR Clopi                                       |                               |                               | SINGLE     |
|                                                                                                                                                                                         |                                           | DAPT can be extended up to 3 years in high ischaemic-risk patients who have tolerated DAPT without a bleeding complication or shortened to 6 months if high bleeding risk |                                                                     |                               |                               | Aspi       |
|                                                                                                                                                                                         | + an indication for oral anticoagulation* | DUAL                                                                                                                                                                      | OAC + Aspi OR Clopi                                                 |                               |                               | SINGLE OAC |
| <b>STEMI</b>                                                                                                                                                                            |                                           |                                                                                                                                                                           |                                                                     |                               |                               |            |
| with fibrinolytic therapy                                                                                                                                                               |                                           | DAPT Aspi + Clopi                                                                                                                                                         | DAPT or SINGLE                                                      | Aspi (+ Clopi)                | SINGLE                        |            |
|                                                                                                                                                                                         |                                           | DAPT can be extended up to 3 years in high ischaemic-risk patients who have tolerated DAPT without a bleeding complication or shortened to 6 months if high bleeding risk |                                                                     |                               |                               | Aspi       |
|                                                                                                                                                                                         | + PCI (DES, BMS or DCB)                   | DAPT                                                                                                                                                                      | Aspi + Clopi                                                        |                               |                               | SINGLE     |
| with LV thrombus or high risk of LV thrombus**                                                                                                                                          |                                           | DUAL VKA + Aspi OR Clopi                                                                                                                                                  | DAPT                                                                | Aspi + Prasu OR Tica OR Clopi |                               | SINGLE     |
|                                                                                                                                                                                         |                                           | TRIPLE VKA + Aspi + Clopi                                                                                                                                                 | TRIPLE or DUAL APT Aspi + (VKA + Clopi) OR (Prasu OR Tica OR Clopi) | DAPT                          | Aspi + Prasu OR Tica OR Clopi |            |

1  
2  
3  
4  
5  
6  
7  
8  
9  
10  
11  
12  
13  
14  
15  
16  
17  
18  
19  
20  
21  
22  
23  
24  
25  
26  
27  
28  
29  
30  
31  
32  
33  
34  
35  
36  
37  
38  
39  
40  
41

2- Locate the precise clinical situation of your patient (treatment already performed, associated pathologies etc.)

\* Indication for OAC: Mechanical heart valve prosthesis, NV-AF or flutter with CHA2DS2-VASc score ≥ 2 for men and ≥ 3 for female. Oral anticoagulation therapy to prevent thromboembolism should be considered in male AF patients with a CHA2DS2-VASc score of 1 and in female AF patients with a CHA2DS2-VASc score of 2. For VTE disease, OAC should be continued for 3 months if there is a triggering factor, 3 to 6 months if it is idiopathic, and for long-term if it is recurrent or associated with a pathology at risk. Once the anticoagulant treatment is complete for VTE disease, the patient will be treated as a patient without indication for oral anticoagulation.

\*\* High risk for LV thrombus: Ejection Fraction < 40%, Anteroapical wall motion abnormality.

<https://www.bmj.com/site/about/guidelines.xhtml>



1  
2  
3 **2bis- Locate the**  
4 **precise clinical**  
5 **situation of your**  
6 **patient**  
7 **(treatment**  
8 **already**  
9 **performed,**  
10 **associated**  
11 **pathologies etc.)**

| Date of the procedure or acute medical event   | M1                                                                                                                                                                                      | M3                                          | M6                                                                    | M12                                         | M = months |
|------------------------------------------------|-----------------------------------------------------------------------------------------------------------------------------------------------------------------------------------------|---------------------------------------------|-----------------------------------------------------------------------|---------------------------------------------|------------|
| <b>ACUTE/RECENT CORONARY SYNDROMES (ACS)</b>   |                                                                                                                                                                                         |                                             |                                                                       |                                             |            |
| <b>NSTE-ACS or STEMI</b>                       |                                                                                                                                                                                         |                                             |                                                                       |                                             |            |
| medically managed                              | DAPT                                                                                                                                                                                    | Aspi + Tica <b>OR</b> Clopi                 |                                                                       |                                             | SINGLE     |
|                                                | DAPT can be extended up to 3 years in high ischaemic-risk patients who have tolerated DAPT without a bleeding complication or shortened to 6 months if high bleeding risk               |                                             |                                                                       |                                             | Aspi       |
| + an indication for oral anticoagulation*      | DUAL                                                                                                                                                                                    | OAC + Aspi <b>OR</b> Clopi                  |                                                                       |                                             | SINGLE     |
|                                                |                                                                                                                                                                                         |                                             |                                                                       |                                             | OAC        |
| with PCI (DES, BMS, or DCB)                    | DAPT                                                                                                                                                                                    | Aspi + Prasu <b>OR</b> Tica <b>OR</b> Clopi |                                                                       |                                             | MONO       |
|                                                | DAPT can be extended up to 3 years in high ischaemic-risk patients who have tolerated DAPT without a bleeding complication or shortened to 6 months if high bleeding risk               |                                             |                                                                       |                                             | Aspi       |
| + an indication for oral anticoagulation*      | TRIPLE                                                                                                                                                                                  | TRIPLE or DUAL                              | OAC + Aspi <b>AND/OR</b> Clopi                                        | DUAL                                        | SINGLE     |
|                                                | OAC + Aspi + Clopi                                                                                                                                                                      | OAC + Aspi                                  | OAC + Aspi <b>OR</b> Clopi                                            | OAC + Aspi <b>OR</b> Clopi                  | OAC        |
|                                                | Dual therapy with OAC and clopidogrel should be considered as an alternative to 1-month triple therapy in patients in whom the bleeding risk outweighs the ischemic risk (HAS BLED ≥ 3) |                                             |                                                                       |                                             |            |
| with CABG                                      | DAPT                                                                                                                                                                                    | Aspi + Prasu <b>OR</b> Tica <b>OR</b> Clopi |                                                                       |                                             | SINGLE     |
|                                                | DAPT can be extended up to 3 years in high ischaemic-risk patients who have tolerated DAPT without a bleeding complication or shortened to 6 months if high bleeding risk               |                                             |                                                                       |                                             | Aspi       |
| + an indication for oral anticoagulation*      | DUAL                                                                                                                                                                                    | OAC + Aspi <b>OR</b> Clopi                  |                                                                       |                                             | SINGLE     |
|                                                |                                                                                                                                                                                         |                                             |                                                                       |                                             | OAC        |
| <b>STEMI</b>                                   |                                                                                                                                                                                         |                                             |                                                                       |                                             |            |
| with fibrinolytic therapy                      | DAPT                                                                                                                                                                                    | DAPT or SINGLE                              | Aspi (+ Clopi)                                                        | SINGLE                                      |            |
|                                                | Aspi + Clopi                                                                                                                                                                            |                                             |                                                                       | Aspi                                        |            |
| + PCI (DES, BMS or DCB)                        | DAPT                                                                                                                                                                                    | Aspi + Clopi                                |                                                                       |                                             | SINGLE     |
|                                                | DAPT can be extended up to 3 years in high ischaemic-risk patients who have tolerated DAPT without a bleeding complication or shortened to 6 months if high bleeding risk               |                                             |                                                                       |                                             | Aspi       |
| with LV thrombus or high risk of LV thrombus** | DUAL                                                                                                                                                                                    | VKA + Aspi <b>OR</b> Clopi                  | DAPT                                                                  | Aspi + Prasu <b>OR</b> Tica <b>OR</b> Clopi | SINGLE     |
|                                                |                                                                                                                                                                                         |                                             |                                                                       | Aspi                                        |            |
| + PCI (DES, BMS or DCB)                        | TRIPLE                                                                                                                                                                                  | VKA + Aspi + Clopi                          | TRIPLE or DUAL APT                                                    | DAPT                                        | SINGLE     |
|                                                |                                                                                                                                                                                         |                                             | Aspi + (VKA + Clopi) <b>OR</b> (Prasu <b>OR</b> Tica <b>OR</b> Clopi) | Aspi + Prasu <b>OR</b> Tica <b>OR</b> Clopi | Aspi       |

**ABBREVIATIONS**

- CHA2DS2-VASc** C Congestive Heart failure (+1)
- H Hypertension (+1) A2 Age ≥ 75 (+2)
- D Diabetes Mellitus (+1) S2 Prior stroke or TIA thromboembolism (+2)
- V Vascular disease (+1) A Age 65-74 (+1)
- Sc Sex category (i.e.: female sex) (+1)

**Hypertension and diabetes = 2 points**  
**→ Indication for oral anticoagulation**

- HAS BLED** Abnormal renal / liver function (+1 or +2)
- Hypertension (+1) Stroke history (+1)
- Prior major Bleeding or predisposition to bleeding (+1)
- Labile INR (+1) Elderly > 65 (+1)
- Drugs (concomitant aspirin, clopidogrel, NSAIDs) or alcohol (+1 or +2)

**Abnormal renal function = 1 point**  
**Drugs = 1 point**  
**HAS BLED = 2**

36  
37\* **Indication for OAC: Mechanical heart valve prosthesis, NV-AF or flutter with CHA2DS2-VASc score ≥ 2 for men and ≥ 3 for female. Oral anticoagulation therapy to**  
38 **prevent thromboembolism should be considered in male AF patients with a CHA2DS2-VASc score of 1 and in female AF patients with a CHA2DS2-VASc score of 2. For**  
39  
40  
41



1  
2  
3  
4  
5  
6  
7  
8  
9  
10  
11  
12  
13  
14  
15  
16  
17  
18  
19 **3- In the**  
20 **recommended**  
21 **treatment, find**  
22 **out where your**  
23 **patient is**  
24 **currently**  
25 **(here: 5**  
26 **months)**

**Here, two options are possible according to the ischemic and bleeding risk of your patient:**

- 1) Dual therapy: OAC + Aspirin OR Clopidogrel up to 12 months (so for another 7 months)
- 2) Triple therapy: OAC + Aspirin + Clopidogrel up to 6 months (so for another 1 month) and then a dual therapy with OAC + Aspirin OR Clopidogrel up to 12 months (so for another 6 months)

For peer review only - <http://bmjopen.bmj.com/site/about/guidelines.xhtml>

a pathology at risk. Once the anticoagulant treatment is complete for VTE disease, the patient will be treated as a patient without indication for oral anticoagulation.  
 \*\* High risk for LV thrombus: Ejection Fraction < 40%, Anteroapical wall motion abnormality.

|                 |                                                                  |
|-----------------|------------------------------------------------------------------|
| <b>SINGLE</b>   | Single Therapy:<br>Antiplatelet (SAPT) or Anticoagulation (SACT) |
| <b>DUAL APT</b> | Dual Antiplatelet Therapy (DAPT)                                 |
| <b>DUAL</b>     | Dual Therapy (SAPT + SACT)                                       |
| <b>TRIPLE</b>   | Triple Therapy (DAPT + SACT)                                     |

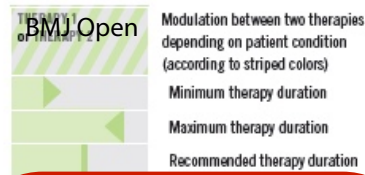

**Abbreviations**

|                                      |                                                                                                                                                                                                                                                                         |
|--------------------------------------|-------------------------------------------------------------------------------------------------------------------------------------------------------------------------------------------------------------------------------------------------------------------------|
| <b>ABC<sup>2</sup> score for TIA</b> | Age ≥ 60 years (+1)<br>Clinical features of the TIA (unilateral weakness (+2), speech disturbance without weakness (+1), other symptoms (0))<br>Duration of symptoms (< 10 min (0), 10-59 min (+1), ≥ 60 min (+2))<br>BP ≥ 140/90 mmHg (+1)      Diabetes (+1)          |
| <b>ACS</b>                           | Acute Coronary Syndrome                                                                                                                                                                                                                                                 |
| <b>Aspi</b>                          | Aspirin                                                                                                                                                                                                                                                                 |
| <b>BMS</b>                           | Bare-Metal Stent                                                                                                                                                                                                                                                        |
| <b>CABG</b>                          | Coronary Artery By Pass Graft                                                                                                                                                                                                                                           |
| <b>CHA2DS2-VASc</b>                  | C Congestive Heart failure (+1)<br>H Hypertension (+1)      A2 Age ≥ 75 (+2)<br>D Diabetes Mellitus (+1)      S2 Prior stroke or TIA/thromboembolism (+1)<br>V Vascular disease (+1)      A Age 65-74 (+1)<br>Sc Sex category (i.e.: female sex) (+1)                   |
| <b>Cilo</b>                          | Cilostazol                                                                                                                                                                                                                                                              |
| <b>Clopi</b>                         | Clopidogrel                                                                                                                                                                                                                                                             |
| <b>CTLI</b>                          | Chronic Limb-Threatening Ischemia                                                                                                                                                                                                                                       |
| <b>DAPT</b>                          | Dual Antiplatelet Therapy                                                                                                                                                                                                                                               |
| <b>DCB</b>                           | Drug-Coated Balloon                                                                                                                                                                                                                                                     |
| <b>DES</b>                           | Drug-Eluting Stent                                                                                                                                                                                                                                                      |
| <b>DOA</b>                           | Direct Oral Anticoagulant                                                                                                                                                                                                                                               |
| <b>DUAL</b>                          | Dual Therapy: SAPT + SACT                                                                                                                                                                                                                                               |
| <b>HAS BLEED</b>                     | Abnormal renal / liver function (+1 or +2)<br>Hypertension (+1)      Stroke history (+1)<br>Prior major Bleeding or predisposition to bleeding (+1)<br>Labile INR (+1)      Elderly > 65 (+1)<br>Drugs (concomitant aspirin, clopidogrel, NSAIDs) or alcohol (+1 or +2) |
| <b>INR</b>                           | International Normalized Ratio                                                                                                                                                                                                                                          |
| <b>LEAD</b>                          | Lower Extremity Artery Disease                                                                                                                                                                                                                                          |
| <b>LV</b>                            | Left Ventricular                                                                                                                                                                                                                                                        |
| <b>NIBSS</b>                         | National Institutes of Health Stroke Scale                                                                                                                                                                                                                              |
| <b>NSTE-ACS</b>                      | Non-ST Elevation Acute Coronary Syndrome                                                                                                                                                                                                                                |
| <b>NV-AF</b>                         | Non-valvular atrial fibrillation                                                                                                                                                                                                                                        |
| <b>OAC</b>                           | Oral Anticoagulant: VKA or DOA                                                                                                                                                                                                                                          |
| <b>PCI</b>                           | Percutaneous coronary intervention (= DES, BMS or DCB)                                                                                                                                                                                                                  |
| <b>Prasu</b>                         | Prasugrel                                                                                                                                                                                                                                                               |
| <b>SAPT</b>                          | Single Antiplatelet Therapy                                                                                                                                                                                                                                             |
| <b>SACT</b>                          | Single Anticoagulation Therapy                                                                                                                                                                                                                                          |
| <b>SCAD</b>                          | Stable coronary artery disease                                                                                                                                                                                                                                          |
| <b>STEMI</b>                         | ST-Elevation Myocardial Infarction                                                                                                                                                                                                                                      |
| <b>TAVR</b>                          | Transcatheter Aortic Valve Replacement                                                                                                                                                                                                                                  |
| <b>TIA</b>                           | Transient Ischemic Attack                                                                                                                                                                                                                                               |
| <b>Tica</b>                          | Ticagrelor                                                                                                                                                                                                                                                              |
| <b>Triflu</b>                        | Triflusal                                                                                                                                                                                                                                                               |
| <b>TRIPLE</b>                        | Triple Therapy: DAPT + SACT                                                                                                                                                                                                                                             |
| <b>VKA</b>                           | Vitamin K Antagonist Transcatheter Aortic Valve                                                                                                                                                                                                                         |
| <b>VTE</b>                           | Venous Thromboembolism                                                                                                                                                                                                                                                  |

CLINICAL SITUATIONS NOT FOUND IN THIS TOOL NEED A SPECIALIST'S OPINION

| TARGET INR FOR MECHANICAL PROSTHESES |      | Patient-related risk factor <sup>a</sup> |  |
|--------------------------------------|------|------------------------------------------|--|
| Prosthesis thrombogenicity           | None | ≥1                                       |  |
| Low <sup>b</sup>                     | 2.5  | 3.0                                      |  |
| Medium <sup>c</sup>                  | 3.0  | 3.5                                      |  |
| High <sup>d</sup>                    | 3.5  | 4.0                                      |  |

INR = international normalized ratio; LVEF = left ventricular ejection fraction  
<sup>a</sup> Mitral or tricuspid valve replacement, previous thromboembolism; atrial fibrillation, mitral stenosis of any degree, LVEF < 35%  
<sup>b</sup> Carbomedics, Medtronic Hall, ATS, Medtronic Open-Pivot, St-Jude Medical, On-X, Sorbus  
<sup>c</sup> Other bileaflet valve with insufficient data  
<sup>d</sup> Lillehei-Kaster, Omniscience, Starr-Edwards (ball-cage), Bjork Shiley and other tilting-disc valves

**Dosage of antithrombotic drugs**

Aspirin: 75-100 mg/day  
 Aspirin/dipyridamole: 25/200 mg twice a day  
 Cilostazol: 100 mg twice a day  
 Clopidogrel: 75 mg/day  
 Prasugrel: 10 mg/day (5 mg/day in patients with body weight < 60 kg)  
 Contraindications for prasugrel: previous intracranial haemorrhage, previous ischaemic stroke or transient ischaemic attack, or ongoing bleeds; prasugrel is not recommended for patients >75 years of age or with a body weight <60 kg.  
 Ticagrelor: 90 mg twice a day  
 Contraindications for ticagrelor: previous intracranial haemorrhage or ongoing bleeds.  
 Triflusal: 600 mg/day  
 VKA: target INR 2-3 for NV-AF, VTE, LV thrombus  
 Rivaroxaban (Xarelto):  
 • Venous thrombo-embolism (venous thrombosis/pulmonary embolism): D1 to D21: 15 mg x 2/day then from D22 onwards: 20 mg/day in a single take  
 • For the prevention of embolic stroke in patients with NV-AF: 20 mg/day in a single take  
 • No adjustment on weight, age, sex  
 • Renal failure  
 - Contraindication with creatinine clearance < 15 ml/min  
 - With creatinine clearance between 15-49 ml/min:  
   § NV-AF: 15 mg/day  
   § Venous thrombo-embolism: 15 mg x 2/day during the first three weeks then 20 mg/day in a single take  
 - No adjustment beyond a creatinine clearance > 50 ml/min  
 Apixaban (Eliquis):  
 • For the prevention of embolic stroke in patients with NV-AF:  
   - 5 mg x 2/day  
   - NV-AF and at least two of the following: age ≥ 80 yo, weight ≤ 60 kg, serum creatinine ≥ 133 micromol/L; 2.5 mg x 2/day  
   - With creatinine clearance between 15-29 ml/min: 2.5 mg x 2/day  
   - Contraindication with creatinine clearance < 15 ml/min  
 • Venous thrombo-embolism (venous thrombosis/pulmonary embolism): D1 to D7: 10 mg x 2/day then from D8 onwards: 5 mg x 2/day  
 Dabigatran (Pradaxa):  
 • For the prevention of embolic stroke in patients with NV-AF or VTE treatment, after treatment with a parenteral anticoagulant for at least 5 days: 150 mg x 2/day  
 • 110 mg x 2/day if:  
   § > 80 yo  
   § Patients also treated with Verapamil  
   § clearance between 30-50 ml/min  
 Contraindication with creatinine clearance < 30 ml/min

**THE COCKCROFT AND GAULT FORMULA (1973)**  
 $C_{Cr} = \{((140 - \text{Age}) \times \text{Weight}) / (72 \times S_{Cr})\} \times 0.85$  (if female)  
 $C_{Cr}$  (creatinine clearance) = mL/minute  
 Age = years      Weight = kg      S<sub>Cr</sub> (serum creatinine) = mg/dL

**IF BLEEDING DURING DAPT, follow these recommendations (figure 10):**  
<https://www.escardio.org/Guidelines/Clinical-Practice-Guidelines/2017-focused-update-on-dual-antiplatelet-therapy-dapt>

**SPECIFIC CONDITIONS REQUIRING SYSTEMATICALLY AN IN-HOSPITAL SPECIALIST HAVE BEEN EXCLUDED:** cancer, auto-immune disease, hemophilia, human immunodeficiency virus (HIV), pediatrics and pregnancy and In-hospital prescriptions (including bridging therapy, perioperative therapy, and treatment of acute phase of cardiovascular event)

**OAC :**

- VKA with a target INR: 2–3
- Rivaroxaban 15 mg/day
- Apixaban 5 mg X 2/day
- Dabigatran is contraindicated

**Antiplatelets:**

- Aspirin 75-100 mg/day
- Clopidogrel 75 mg/day

1  
2  
3  
4  
5  
6  
7  
8  
9  
10  
11 **4- Check the**  
12 **recommended**  
13 **dosage for the**  
14 **drugs you**  
15 **want to**  
16 **prescribe**

## **Appendix 2: Example of a clinical vignette**

At your medical consultation, you meet Mr R, 86 years old (weight: 81 kg, body mass index: 24 kg/m<sup>2</sup>). Mr R is a widower, a smoker (10 cigarettes a day, 50 pack-years) and is autonomous in all daily activities. He has no personal medical history and he takes no drug. His last biological test did not find any abnormalities (serum creatinine value: 77 µM/L, creatinine clearance using the Cockcroft-Gault formula: 70 ml/min).

He comes to see you in consultation because for more than 1 week, he has had palpitations with exercise. You perform electrocardiogram (ECG) in your office and you diagnose non-valvular atrial fibrillation. The biological assessment is without particularity (in particular blood ionography and thyroid-stimulating hormone). Cardiac ultrasonography revealed a dilated left atrium with no valve abnormality.

### **1) How many antithrombotic treatments will you prescribe during this consultation?**

- 0
- 1
- 2
- 3

### **2) If you answered 0 to question 1, go to question 5. If not, which molecule(s) of antithrombotic(s) will you prescribe during this consultation?**

- Warfarin
- Rivaroxaban
- Apixaban
- Aspirin
- Clopidogrel

### **3) Which dosage will you prescribe this(these) molecule(s)? (For each molecule checked on the previous question, it will appear:)**

- Warfarin:
  - INR (International Normalized Ratio): 2-3
  - INR (International Normalized Ratio): 2.5-3.5
- Rivaroxaban
  - 15 mg per day
  - 20 mg per day
- Apixaban
  - 2.5 mg twice a day
  - 5 mg twice a day
- Aspirin
  - 75-100 mg per day
  - 300 mg per day
- Clopidogrel
  - 75 mg per day
  - 300 mg per day

1  
2  
3 **4) How long does the antithrombotic treatment prescribed in the previous question need**  
4 **to be continued?**

- 5
- 6 • 1 month
  - 7 • 6 months
  - 8 • 12 months
  - 9 • For life
- 10

11 **5) On a scale of 0 to 10, what is your degree of confidence in the adequacy of your**  
12 **prescription in relation to the guidelines?**

13  
14  
15  
16 **For the experimental group, after completion of the 3 clinical vignettes:**

17  
18  
19 **Regarding the prescription support tool, please note the following items from 0 (strongly**  
20 **disagree) to 10 (strongly agree):**

- 21
- 22 • The prescription support-tool helped me answer to the clinical vignettes:../10
  - 23 • The prescription support-tool has modified the answers that I spontaneously made to
  - 24 clinical vignettes:../10
  - 25 • The prescription support-tool is clear:../10
  - 26 • The prescription support-tool is operational:../10
  - 27 • The prescription support-tool is useful for practice:../10
  - 28 • I would be ready to use this prescription support-tool:../10
  - 29 • I would recommend the use of this prescription support-tool:../10
- 30  
31  
32

33 **Notes on the tool: What are the points of the prescription support-tool that could be**  
34 **improved: useless information, missing information, presentation, etc:**

35  
36  
37  
38  
39  
40  
41  
42  
43  
44  
45  
46  
47  
48  
49  
50  
51  
52  
53  
54  
55  
56  
57  
58  
59  
60

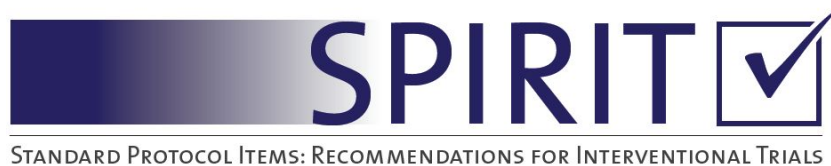

STANDARD PROTOCOL ITEMS: RECOMMENDATIONS FOR INTERVENTIONAL TRIALS

SPIRIT 2013 Checklist: Recommended items to address in a clinical trial protocol and related documents\*

| Section/item                      | Item No | Description                                                                                                                                                                                                                                                                              |
|-----------------------------------|---------|------------------------------------------------------------------------------------------------------------------------------------------------------------------------------------------------------------------------------------------------------------------------------------------|
| <b>Administrative information</b> |         |                                                                                                                                                                                                                                                                                          |
| Title                             | 1       | Descriptive title identifying the study design, population, interventions, and, if applicable, trial acronym<br>→ <b>Page 1</b>                                                                                                                                                          |
| Trial registration                | 2a      | Trial identifier and registry name. If not yet registered, name of intended registry<br>→ <b>Page 2 line 53, Page 12 line 275</b>                                                                                                                                                        |
|                                   | 2b      | All items from the World Health Organization Trial Registration Data Set                                                                                                                                                                                                                 |
| Protocol version                  | 3       | Date and version identifier<br>→ <b>line 270 - 274, page 12</b>                                                                                                                                                                                                                          |
| Funding                           | 4       | Sources and types of financial, material, and other support<br>→ <b>line 268, page 12</b>                                                                                                                                                                                                |
| Roles and responsibilities        | 5a      | Names, affiliations, and roles of protocol contributors<br>→ <b>Title page and lines 263 - 267 page 12</b>                                                                                                                                                                               |
|                                   | 5b      | Name and contact information for the trial sponsor                                                                                                                                                                                                                                       |
|                                   | 5c      | Role of study sponsor and funders, if any, in study design; collection, management, analysis, and interpretation of data; writing of the report; and the decision to submit the report for publication, including whether they will have ultimate authority over any of these activities |
|                                   | 5d      | Composition, roles, and responsibilities of the coordinating centre, steering committee, endpoint adjudication committee, data management team, and other individuals or groups overseeing the trial, if applicable (see Item 21a for data monitoring committee)                         |
| <b>Introduction</b>               |         |                                                                                                                                                                                                                                                                                          |
| Background and rationale          | 6a      | Description of research question and justification for undertaking the trial, including summary of relevant studies (published and unpublished) examining benefits and harms for each intervention<br>→ <b>Lines 67 – 97, page 4 - 5</b>                                                 |
|                                   | 6b      | Explanation for choice of comparators                                                                                                                                                                                                                                                    |

|    |                                                           |     |                                                                               |
|----|-----------------------------------------------------------|-----|-------------------------------------------------------------------------------|
| 1  |                                                           |     |                                                                               |
| 2  | Objectives                                                | 7   | Specific objectives or hypotheses                                             |
| 3  |                                                           |     | → <b>Lines 98 - 101, page 5</b>                                               |
| 4  |                                                           |     |                                                                               |
| 5  | Trial design                                              | 8   | Description of trial design including type of trial (eg, parallel group,      |
| 6  |                                                           |     | crossover, factorial, single group), allocation ratio, and framework (eg,     |
| 7  |                                                           |     | superiority, equivalence, noninferiority, exploratory)                        |
| 8  |                                                           |     |                                                                               |
| 9  |                                                           |     |                                                                               |
| 10 |                                                           |     |                                                                               |
| 11 | <b>Methods: Participants, interventions, and outcomes</b> |     |                                                                               |
| 12 |                                                           |     |                                                                               |
| 13 | Study setting                                             | 9   | Description of study settings (eg, community clinic, academic hospital)       |
| 14 |                                                           |     | and list of countries where data will be collected. Reference to where        |
| 15 |                                                           |     | list of study sites can be obtained                                           |
| 16 |                                                           |     | → <b>Lines 106 - 108 page 5</b>                                               |
| 17 |                                                           |     |                                                                               |
| 18 | Eligibility criteria                                      | 10  | Inclusion and exclusion criteria for participants. If applicable, eligibility |
| 19 |                                                           |     | criteria for study centres and individuals who will perform the               |
| 20 |                                                           |     | interventions (eg, surgeons, psychotherapists)                                |
| 21 |                                                           |     | → <b>Lines 106 - 108 page 5</b>                                               |
| 22 |                                                           |     |                                                                               |
| 23 |                                                           |     |                                                                               |
| 24 | Interventions                                             | 11a | Interventions for each group with sufficient detail to allow replication,     |
| 25 |                                                           |     | including how and when they will be administered                              |
| 26 |                                                           |     | → <b>Lines 109 - 136, page 5 - 6</b>                                          |
| 27 |                                                           |     |                                                                               |
| 28 |                                                           |     |                                                                               |
| 29 |                                                           | 11b | Criteria for discontinuing or modifying allocated interventions for a         |
| 30 |                                                           |     | given trial participant (eg, drug dose change in response to harms,           |
| 31 |                                                           |     | participant request, or improving/worsening disease)                          |
| 32 |                                                           |     |                                                                               |
| 33 |                                                           | 11c | Strategies to improve adherence to intervention protocols, and any            |
| 34 |                                                           |     | procedures for monitoring adherence (eg, drug tablet return,                  |
| 35 |                                                           |     | laboratory tests)                                                             |
| 36 |                                                           |     |                                                                               |
| 37 |                                                           |     |                                                                               |
| 38 |                                                           | 11d | Relevant concomitant care and interventions that are permitted or             |
| 39 |                                                           |     | prohibited during the trial                                                   |
| 40 |                                                           |     |                                                                               |
| 41 | Outcomes                                                  | 12  | Primary, secondary, and other outcomes, including the specific                |
| 42 |                                                           |     | measurement variable (eg, systolic blood pressure), analysis metric           |
| 43 |                                                           |     | (eg, change from baseline, final value, time to event), method of             |
| 44 |                                                           |     | aggregation (eg, median, proportion), and time point for each                 |
| 45 |                                                           |     | outcome. Explanation of the clinical relevance of chosen efficacy and         |
| 46 |                                                           |     | harm outcomes is strongly recommended                                         |
| 47 |                                                           |     | → <b>Lines 148 - 159, page 7</b>                                              |
| 48 |                                                           |     |                                                                               |
| 49 |                                                           |     |                                                                               |
| 50 | Participant                                               | 13  | Time schedule of enrolment, interventions (including any run-ins and          |
| 51 | timeline                                                  |     | washouts), assessments, and visits for participants. A schematic              |
| 52 |                                                           |     | diagram is highly recommended (see Figure)                                    |
| 53 |                                                           |     | → <b>Lines 109 - 136, page 5 - 6</b>                                          |
| 54 |                                                           |     |                                                                               |
| 55 |                                                           |     |                                                                               |
| 56 |                                                           |     |                                                                               |
| 57 |                                                           |     |                                                                               |
| 58 |                                                           |     |                                                                               |
| 59 |                                                           |     |                                                                               |
| 60 |                                                           |     |                                                                               |

- 1  
2 Sample size 14 Estimated number of participants needed to achieve study objectives  
3 and how it was determined, including clinical and statistical  
4 assumptions supporting any sample size calculations  
5 → **Lines 208 – 213, page 9**  
6  
7 Recruitment 15 Strategies for achieving adequate participant enrolment to reach  
8 target sample size  
9 → **Lines 146-147, page 7**  
10  
11

## 12 **Methods: Assignment of interventions (for controlled trials)**

### 13 Allocation:

- 14  
15  
16 Sequence generation 16a Method of generating the allocation sequence (eg, computer-  
17 generated random numbers), and list of any factors for stratification.  
18 To reduce predictability of a random sequence, details of any planned  
19 restriction (eg, blocking) should be provided in a separate document  
20 that is unavailable to those who enrol participants or assign  
21 interventions  
22 **Lines 137 – 143, page 6-7**  
23 **Lines 198 - 201 page 9**  
24  
25  
26 Allocation concealment mechanism 16b Mechanism of implementing the allocation sequence (eg, central  
27 telephone; sequentially numbered, opaque, sealed envelopes),  
28 describing any steps to conceal the sequence until interventions are  
29 assigned  
30 **Lines 198 - 201 page 9**  
31  
32  
33 Implementation 16c Who will generate the allocation sequence, who will enrol participants,  
34 and who will assign participants to interventions  
35 **Lines 198 - 201 page 9**  
36  
37  
38 Blinding (masking) 17a Who will be blinded after assignment to interventions (eg, trial  
39 participants, care providers, outcome assessors, data analysts), and  
40 how  
41  
42 17b If blinded, circumstances under which unblinding is permissible, and  
43 procedure for revealing a participant's allocated intervention during  
44 the trial  
45  
46

## 47 **Methods: Data collection, management, and analysis**

- 48  
49 Data collection methods 18a Plans for assessment and collection of outcome, baseline, and other  
50 trial data, including any related processes to promote data quality (eg,  
51 duplicate measurements, training of assessors) and a description of  
52 study instruments (eg, questionnaires, laboratory tests) along with  
53 their reliability and validity, if known. Reference to where data  
54 collection forms can be found, if not in the protocol  
55 → **Lines 202 – 206 page 9**  
56  
57  
58  
59  
60



- 1  
2  
3  
4  
5  
6  
7  
8  
9  
10  
11  
12  
13  
14  
15  
16  
17  
18  
19  
20  
21  
22  
23  
24  
25  
26  
27
- 18b Plans to promote participant retention and complete follow-up, including list of any outcome data to be collected for participants who discontinue or deviate from intervention protocols
- Data management 19 Plans for data entry, coding, security, and storage, including any related processes to promote data quality (eg, double data entry; range checks for data values). Reference to where details of data management procedures can be found, if not in the protocol  
→ **Lines 202 – 206 page 9**
- Statistical methods 20a Statistical methods for analysing primary and secondary outcomes. Reference to where other details of the statistical analysis plan can be found, if not in the protocol  
→ **Lines 214 - 230, page 9-10**
- 20b Methods for any additional analyses (eg, subgroup and adjusted analyses)  
→ **Lines 226 - 227, page 10**
- 20c Definition of analysis population relating to protocol non-adherence (eg, as randomised analysis), and any statistical methods to handle missing data (eg, multiple imputation)

### Methods: Monitoring

- 28  
29  
30  
31  
32  
33  
34  
35  
36  
37  
38  
39  
40  
41  
42  
43  
44  
45  
46  
47  
48  
49
- Data monitoring 21a Composition of data monitoring committee (DMC); summary of its role and reporting structure; statement of whether it is independent from the sponsor and competing interests; and reference to where further details about its charter can be found, if not in the protocol. Alternatively, an explanation of why a DMC is not needed
- 21b Description of any interim analyses and stopping guidelines, including who will have access to these interim results and make the final decision to terminate the trial
- Harms 22 Plans for collecting, assessing, reporting, and managing solicited and spontaneously reported adverse events and other unintended effects of trial interventions or trial conduct
- Auditing 23 Frequency and procedures for auditing trial conduct, if any, and whether the process will be independent from investigators and the sponsor

### Ethics and dissemination

- 50  
51  
52  
53  
54  
55  
56  
57  
58  
59  
60
- Research ethics approval 24 Plans for seeking research ethics committee/institutional review board (REC/IRB) approval  
→ **Lines 248 – 249 page 11 and Lines 270 - 274 page 12**

|    |                   |     |                                                                               |
|----|-------------------|-----|-------------------------------------------------------------------------------|
| 1  |                   |     |                                                                               |
| 2  | Protocol          | 25  | Plans for communicating important protocol modifications (eg,                 |
| 3  | amendments        |     | changes to eligibility criteria, outcomes, analyses) to relevant parties      |
| 4  |                   |     | (eg, investigators, REC/IRBs, trial participants, trial registries, journals, |
| 5  |                   |     | regulators)                                                                   |
| 6  |                   |     |                                                                               |
| 7  | Consent or assent | 26a | Who will obtain informed consent or assent from potential trial               |
| 8  |                   |     | participants or authorised surrogates, and how (see Item 32)                  |
| 9  |                   |     |                                                                               |
| 10 |                   | 26b | Additional consent provisions for collection and use of participant data      |
| 11 |                   |     | and biological specimens in ancillary studies, if applicable                  |
| 12 |                   |     |                                                                               |
| 13 | Confidentiality   | 27  | How personal information about potential and enrolled participants will       |
| 14 |                   |     | be collected, shared, and maintained in order to protect confidentiality      |
| 15 |                   |     | before, during, and after the trial                                           |
| 16 |                   |     | → <b>Lines 204 - 205, page 9</b>                                              |
| 17 |                   |     |                                                                               |
| 18 | Declaration of    | 28  | Financial and other competing interests for principal investigators for       |
| 19 | interests         |     | the overall trial and each study site                                         |
| 20 |                   |     | → <b>Line 269, page 12</b>                                                    |
| 21 |                   |     |                                                                               |
| 22 | Access to data    | 29  | Statement of who will have access to the final trial dataset, and             |
| 23 |                   |     | disclosure of contractual agreements that limit such access for               |
| 24 |                   |     | investigators                                                                 |
| 25 |                   |     | → <b>Lines 277 – 278, page 12</b>                                             |
| 26 |                   |     |                                                                               |
| 27 | Ancillary and     | 30  | Provisions, if any, for ancillary and post-trial care, and for                |
| 28 | post-trial care   |     | compensation to those who suffer harm from trial participation                |
| 29 |                   |     |                                                                               |
| 30 | Dissemination     | 31a | Plans for investigators and sponsor to communicate trial results to           |
| 31 | policy            |     | participants, healthcare professionals, the public, and other relevant        |
| 32 |                   |     | groups (eg, via publication, reporting in results databases, or other         |
| 33 |                   |     | data sharing arrangements), including any publication restrictions            |
| 34 |                   |     | → <b>Lines 256 - 257, page 11</b>                                             |
| 35 |                   |     |                                                                               |
| 36 |                   | 31b | Authorship eligibility guidelines and any intended use of professional        |
| 37 |                   |     | writers                                                                       |
| 38 |                   | 31c | Plans, if any, for granting public access to the full protocol, participant-  |
| 39 |                   |     | level dataset, and statistical code                                           |
| 40 |                   |     |                                                                               |
| 41 |                   |     |                                                                               |
| 42 |                   |     |                                                                               |
| 43 |                   |     |                                                                               |
| 44 |                   |     |                                                                               |
| 45 |                   |     |                                                                               |
| 46 |                   |     |                                                                               |
| 47 | <b>Appendices</b> |     |                                                                               |
| 48 | Informed consent  | 32  | Model consent form and other related documentation given to                   |
| 49 | materials         |     | participants and authorised surrogates                                        |
| 50 |                   |     |                                                                               |
| 51 | Biological        | 33  | Plans for collection, laboratory evaluation, and storage of biological        |
| 52 | specimens         |     | specimens for genetic or molecular analysis in the current trial and for      |
| 53 |                   |     | future use in ancillary studies, if applicable                                |
| 54 |                   |     |                                                                               |
| 55 |                   |     |                                                                               |

\*It is strongly recommended that this checklist be read in conjunction with the SPIRIT 2013 Explanation & Elaboration for important clarification on the items. Amendments to the protocol should be tracked and dated. The SPIRIT checklist is copyrighted by the SPIRIT

1 Group under the Creative Commons "[Attribution-NonCommercial-NoDerivs 3.0 Unported](#)"  
2 license.  
3  
4  
5  
6  
7  
8  
9  
10  
11  
12  
13  
14  
15  
16  
17  
18  
19  
20  
21  
22  
23  
24  
25  
26  
27  
28  
29  
30  
31  
32  
33  
34  
35  
36  
37  
38  
39  
40  
41  
42  
43  
44  
45  
46  
47  
48  
49  
50  
51  
52  
53  
54  
55  
56  
57  
58  
59  
60

For peer review only
