# Supplementary material for: Evaluation of a prescription support-tool for chronic management of oral antithrombotic combinations in adults using clinical vignettes: protocol of a randomised controlled trial
Source: PubMed Central journal article supplement — BMJ Open. 2019 Jun 9;9(6):e025544. doi: 10.1136/bmjopen-2018-025544 (PMC6561457; doi:10.1136/bmjopen-2018-025544), 2019-06-09
Supplement: bmjopen-2018-025544supp001.pdf [file bmjopen-2018-025544supp001.pdf]

# How to use the prescription support tool

# General presentation of the prescription support tool



# In practice

Example 1: one cardiovascular  
disease

- At your medical consultation, you meet Mr R, 85 years old (weight: 81 kg, body mass index: 24 kg/m<sup>2</sup>).
- Medical history: arterial hypertension and Parkinson disease
- He had surgery 8 months ago for an aortic stenosis: transcatheter aortic valve replacement (TAVR)
- Which antithrombotic therapy is recommended in this clinical situation?

# 1- Locate in the chapter headings of the tool, the cardiovascular disease of your patient

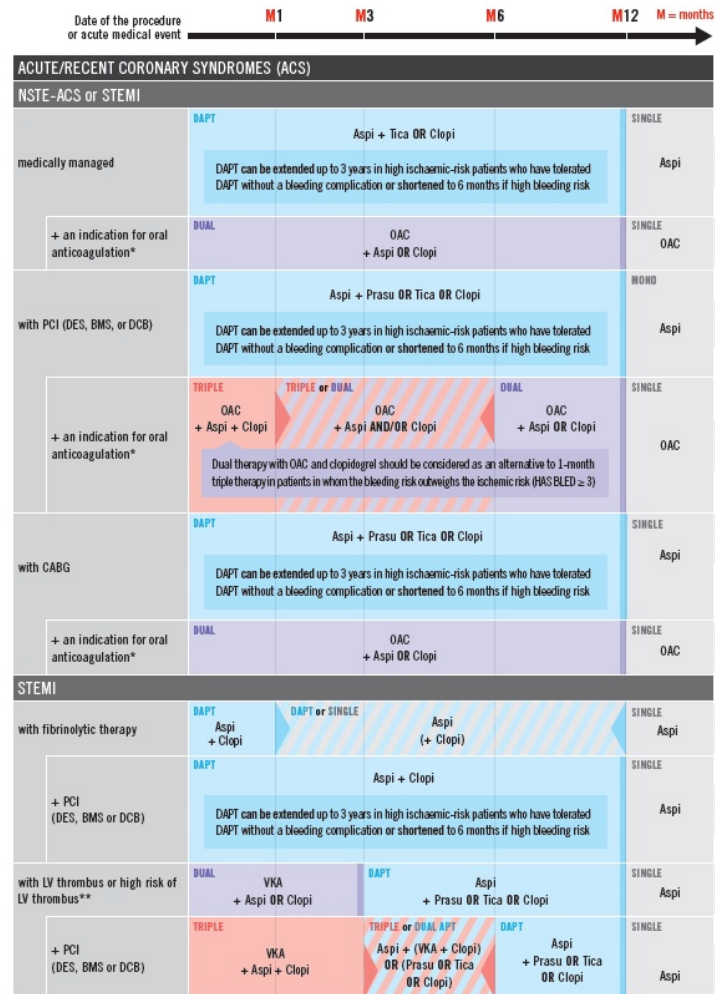

\*Indication for OAC: Mechanical heart valve prosthesis, NV-AF or flutter with CHA2DS2-VASc score  $\geq 2$  for men and  $\geq 3$  for female. Oral anticoagulation therapy to prevent thromboembolism should be considered in male AF patients with a CHA2DS2-VASc score of 1 and in female AF patients with a CHA2DS2-VASc score of 2. For VTE disease, OAC should be continued for 3 months if there is a triggering factor, 3 to 6 months if it is idiopathic, and for long-term if it is recurrent or associated with a pathology at risk. Once the anticoagulant treatment is complete for VTE disease, the patient will be treated as a patient without indication for oral anticoagulation.

\*\* High risk for LV thrombus: Ejection Fraction < 40%, Anteroseptal wall motion abnormality.

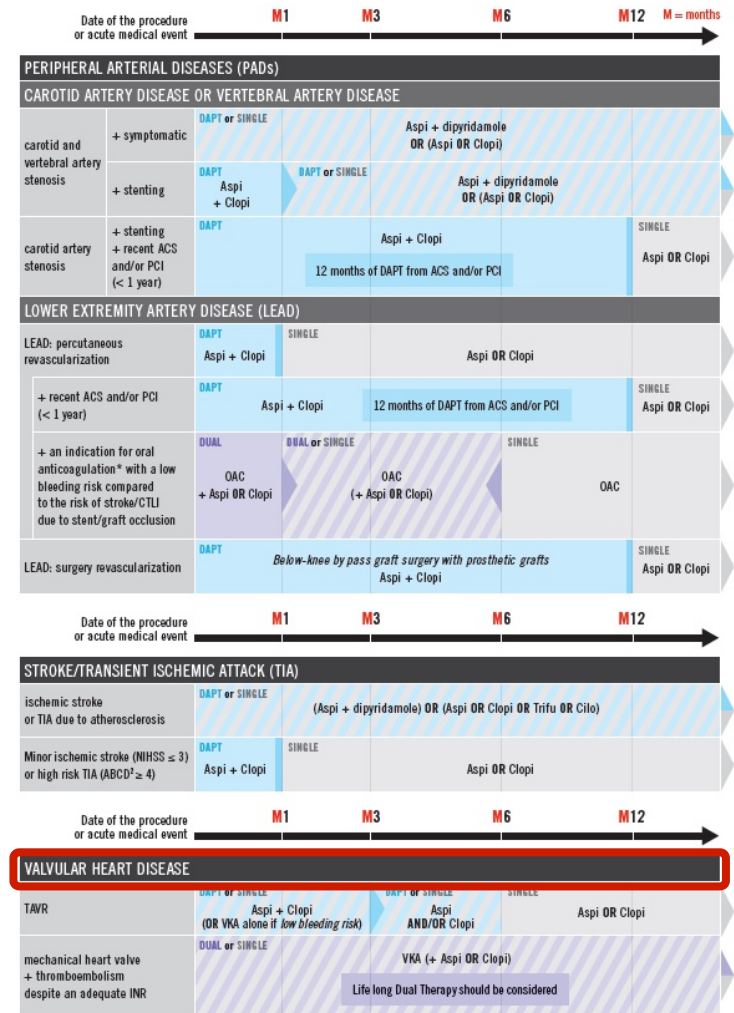

\*Indication for OAC: Mechanical heart valve prosthesis, NV-AF or flutter with CHA2DS2-VASc score  $\geq 2$  for men and  $\geq 3$  for female. Oral anticoagulation therapy to prevent thromboembolism should be considered in male AF patients with a CHA2DS2-VASc score of 1 and in female AF patients with a CHA2DS2-VASc score of 2. For VTE disease, OAC should be continued for 3 months if there is a triggering factor, 3 to 6 months if it is idiopathic, and for long-term if it is recurrent or associated with a pathology at risk. Once the anticoagulant treatment is complete for VTE disease, the patient will be treated as a patient without indication for oral anticoagulation.

## 2- Locate the precise clinical situation of your patient (treatment already performed, associated pathologies etc.)

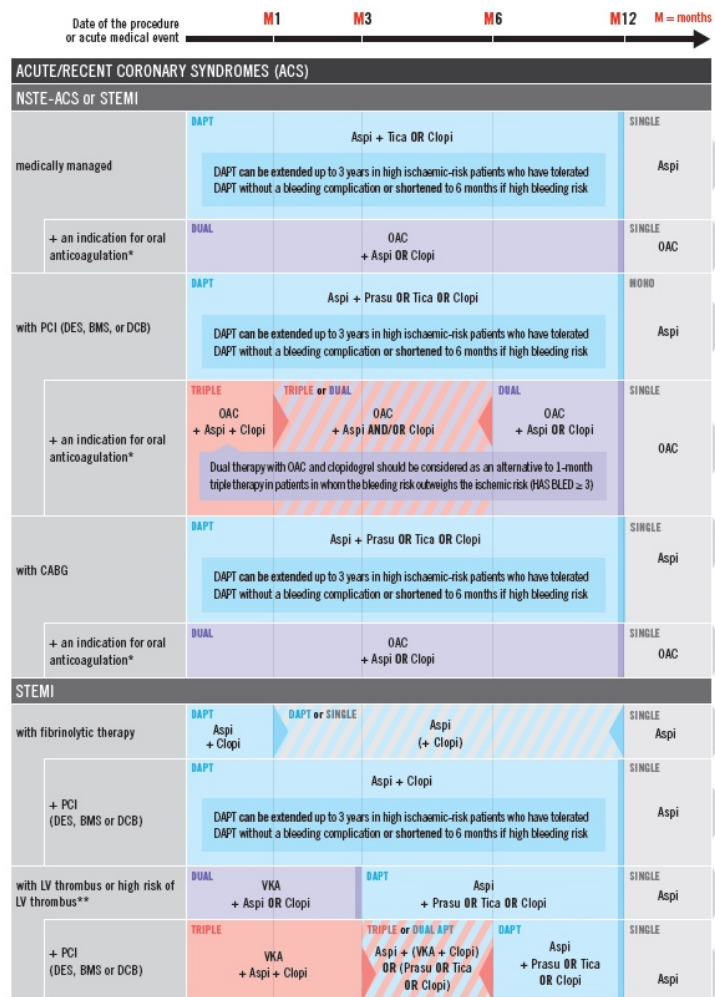

\*Indication for OAC: Mechanical heart valve prosthesis, NV-AF or flutter with CHA2DS2-VASc score  $\geq 2$  for men and  $\geq 3$  for female. Oral anticoagulation therapy to prevent thromboembolism should be considered in male AF patients with a CHA2DS2-VASc score of 1 and in female AF patients with a CHA2DS2-VASc score of 2. For VTE disease, OAC should be continued for 3 months if there is a triggering factor, 3 to 6 months if it is idiopathic, and for long-term if it is recurrent or associated with a pathology at risk. Once the anticoagulant treatment is complete for VTE disease, the patient will be treated as a patient without indication for oral anticoagulation.

\*\* High risk for LV thrombus: Ejection Fraction < 40%, Anteroseptal wall motion abnormality.

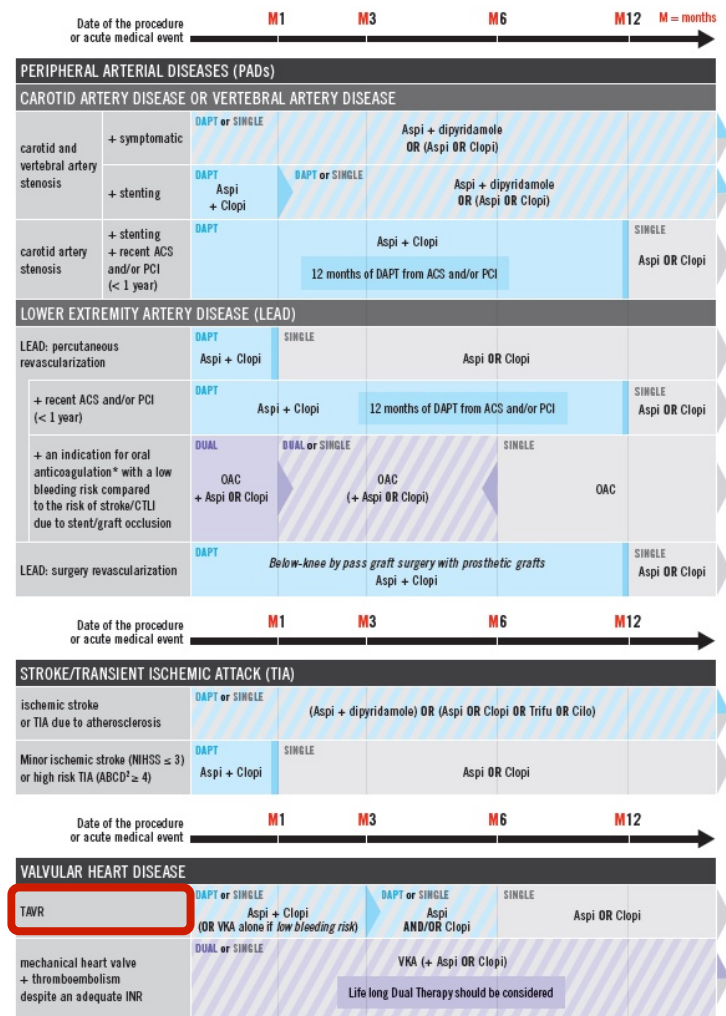

\*Indication for OAC: Mechanical heart valve prosthesis, NV-AF or flutter with CHA2DS2-VASc score  $\geq 2$  for men and  $\geq 3$  for female. Oral anticoagulation therapy to prevent thromboembolism should be considered in male AF patients with a CHA2DS2-VASc score of 1 and in female AF patients with a CHA2DS2-VASc score of 2. For VTE disease, OAC should be continued for 3 months if there is a triggering factor, 3 to 6 months if it is idiopathic, and for long-term if it is recurrent or associated with a pathology at risk. Once the anticoagulant treatment is complete for VTE disease, the patient will be treated as a patient without indication for oral anticoagulation.

3- In the recommended treatment, find out where your patient is currently (here: 8 months)

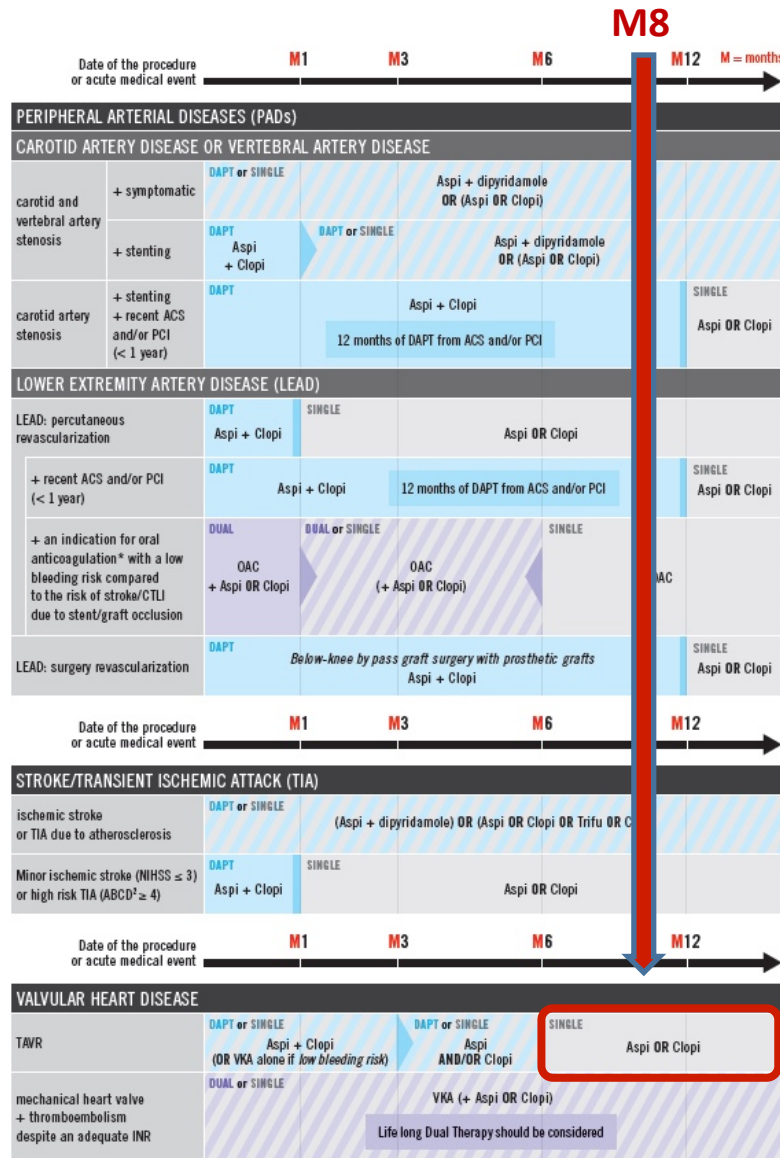

Long-term single antithrombotic therapy is recommended:

- 1) Aspirin
- 2) Clopidogrel

\*Indication for OAC: Mechanical heart valve prosthesis, NV-AF or flutter with CHA2DS2-VASc score ≥ 2 for men and ≥ 3 for female. Oral anticoagulation therapy to prevent thromboembolism should be considered in male AF patients with a CHA2DS2-VASc score of 1 and in female AF patients with a CHA2DS2-VASc score of 2. For VTE disease, OAC should be continued for 3 months if there is a triggering factor, 3 to 6 months if it is idiopathic, and for long-term if it is recurrent or associated with a pathology at risk. Once the anticoagulant treatment is complete for VTE disease, the patient will be treated as a patient without indication for oral anticoagulation.





# In practice

Example 2: two cardiovascular  
diseases

- At your medical consultation, you meet Mr V, 55 years old (weight: 81 kg, body mass index: 24 kg/m<sup>2</sup>).
- Medical history: arterial hypertension (controlled), diabetes, renal failure (creatinine clearance with Cockcroft formula: 30 ml/min) and permanent non-valvular atrial fibrillation
- He had an acute coronary syndrome 5 months ago with a percutaneous coronary intervention (PCI)
- Which antithrombotic therapy is recommended in this clinical situation?

Date of the procedure or acute medical event → **M1** **M3** **M6** **M12** **M= months**

| ACUTE/RECENT CORONARY SYNDROMES (ACS)                                                                                                                                                   |                                                                                                                                                                           |                                                                                                                                                                           |                                                  |                               |               |
|-----------------------------------------------------------------------------------------------------------------------------------------------------------------------------------------|---------------------------------------------------------------------------------------------------------------------------------------------------------------------------|---------------------------------------------------------------------------------------------------------------------------------------------------------------------------|--------------------------------------------------|-------------------------------|---------------|
| NSTE-ACS or STEMI                                                                                                                                                                       |                                                                                                                                                                           |                                                                                                                                                                           |                                                  |                               |               |
| medically managed                                                                                                                                                                       | DAPT                                                                                                                                                                      | Aspi + Tica OR Clopi                                                                                                                                                      |                                                  |                               | SINGLE        |
|                                                                                                                                                                                         |                                                                                                                                                                           | DAPT can be extended up to 3 years in high ischaemic-risk patients who have tolerated DAPT without a bleeding complication or shortened to 6 months if high bleeding risk |                                                  |                               | Aspi          |
| + an indication for oral anticoagulation*                                                                                                                                               | DUAL                                                                                                                                                                      | OAC + Aspi OR Clopi                                                                                                                                                       |                                                  |                               | SINGLE<br>OAC |
| with PCI (DES, BMS, or DCB)                                                                                                                                                             | DAPT                                                                                                                                                                      | Aspi + Prasu OR Tica OR Clopi                                                                                                                                             |                                                  |                               | MONO          |
|                                                                                                                                                                                         |                                                                                                                                                                           | DAPT can be extended up to 3 years in high ischaemic-risk patients who have tolerated DAPT without a bleeding complication or shortened to 6 months if high bleeding risk |                                                  |                               | Aspi          |
| + an indication for oral anticoagulation*                                                                                                                                               | TRIPLE                                                                                                                                                                    | TRIPLE or DUAL                                                                                                                                                            | DUAL                                             | SINGLE                        |               |
|                                                                                                                                                                                         | OAC + Aspi + Clopi                                                                                                                                                        | OAC + Aspi AND/OR Clopi                                                                                                                                                   | OAC + Aspi OR Clopi                              | OAC                           |               |
| Dual therapy with OAC and clopidogrel should be considered as an alternative to 1-month triple therapy in patients in whom the bleeding risk outweighs the ischemic risk (HAS BLED ≥ 3) |                                                                                                                                                                           |                                                                                                                                                                           |                                                  |                               |               |
| with CABG                                                                                                                                                                               | DAPT                                                                                                                                                                      | Aspi + Prasu OR Tica OR Clopi                                                                                                                                             |                                                  |                               | SINGLE        |
|                                                                                                                                                                                         |                                                                                                                                                                           | DAPT can be extended up to 3 years in high ischaemic-risk patients who have tolerated DAPT without a bleeding complication or shortened to 6 months if high bleeding risk |                                                  |                               | Aspi          |
| + an indication for oral anticoagulation*                                                                                                                                               | DUAL                                                                                                                                                                      | OAC + Aspi OR Clopi                                                                                                                                                       |                                                  |                               | SINGLE<br>OAC |
| STEMI                                                                                                                                                                                   |                                                                                                                                                                           |                                                                                                                                                                           |                                                  |                               |               |
| with fibrinolytic therapy                                                                                                                                                               | DAPT                                                                                                                                                                      | Aspi (+ Clopi)                                                                                                                                                            |                                                  |                               | SINGLE        |
|                                                                                                                                                                                         | Aspi + Clopi                                                                                                                                                              | DAPT or SINGLE                                                                                                                                                            |                                                  |                               | Aspi          |
| + PCI (DES, BMS or DCB)                                                                                                                                                                 | DAPT                                                                                                                                                                      | Aspi + Clopi                                                                                                                                                              |                                                  |                               | SINGLE        |
|                                                                                                                                                                                         | DAPT can be extended up to 3 years in high ischaemic-risk patients who have tolerated DAPT without a bleeding complication or shortened to 6 months if high bleeding risk |                                                                                                                                                                           |                                                  | Aspi                          |               |
| with LV thrombus or high risk of LV thrombus**                                                                                                                                          | DUAL                                                                                                                                                                      | VKA + Aspi OR Clopi                                                                                                                                                       | DAPT                                             |                               | SINGLE        |
|                                                                                                                                                                                         |                                                                                                                                                                           |                                                                                                                                                                           | Aspi + Prasu OR Tica OR Clopi                    |                               | Aspi          |
| + PCI (DES, BMS or DCB)                                                                                                                                                                 | TRIPLE                                                                                                                                                                    | VKA + Aspi + Clopi                                                                                                                                                        | TRIPLE or DUAL APT                               | DAPT                          | SINGLE        |
|                                                                                                                                                                                         |                                                                                                                                                                           |                                                                                                                                                                           | Aspi + (VKA + Clopi) OR (Prasu OR Tica OR Clopi) | Aspi + Prasu OR Tica OR Clopi | Aspi          |

\* Indication for OAC: Mechanical heart valve prosthesis, NV-AF or flutter with CHA2DS2-VASc score ≥ 2 for men and ≥ 3 for female. Oral anticoagulation therapy to prevent thromboembolism should be considered in male AF patients with a CHA2DS2-VASc score of 1 and in female AF patients with a CHA2DS2-VASc score of 2. For VTE disease, OAC should be continued for 3 months if there is a triggering factor, 3 to 6 months if it is idiopathic, and for long-term if it is recurrent or associated with a pathology at risk. Once the anticoagulant treatment is complete for VTE disease, the patient will be treated as a patient without indication for oral anticoagulation.

\*\* High risk for LV thrombus: Ejection Fraction < 40%, Anteroapical wall motion abnormality.

1- Locate in the chapter headings of the tool, the cardiovascular disease of your patient

| Date of the procedure or acute medical event                                                                                                                                                  |                                           | M1                                                                                                                                                                        | M3                                                                     | M6                            | M12                           | M = months     |
|-----------------------------------------------------------------------------------------------------------------------------------------------------------------------------------------------|-------------------------------------------|---------------------------------------------------------------------------------------------------------------------------------------------------------------------------|------------------------------------------------------------------------|-------------------------------|-------------------------------|----------------|
| <b>ACUTE/RECENT CORONARY SYNDROMES (ACS)</b>                                                                                                                                                  |                                           |                                                                                                                                                                           |                                                                        |                               |                               |                |
| <b>NSTE-ACS or STEMI</b>                                                                                                                                                                      |                                           |                                                                                                                                                                           |                                                                        |                               |                               |                |
| medically managed                                                                                                                                                                             |                                           | DAPT                                                                                                                                                                      | Aspi + Tica OR Clopi                                                   |                               |                               | SINGLE         |
|                                                                                                                                                                                               |                                           | DAPT can be extended up to 3 years in high ischaemic-risk patients who have tolerated DAPT without a bleeding complication or shortened to 6 months if high bleeding risk |                                                                        |                               |                               | Aspi           |
|                                                                                                                                                                                               | + an indication for oral anticoagulation* | DUAL                                                                                                                                                                      | OAC + Aspi OR Clopi                                                    |                               |                               | SINGLE<br>OAC  |
| with PCI (DES, BMS, or DCB)                                                                                                                                                                   |                                           | DAPT                                                                                                                                                                      | Aspi + Prasu OR Tica OR Clopi                                          |                               |                               | MONO<br>Aspi   |
|                                                                                                                                                                                               |                                           | DAPT can be extended up to 3 years in high ischaemic-risk patients who have tolerated DAPT without a bleeding complication or shortened to 6 months if high bleeding risk |                                                                        |                               |                               |                |
|                                                                                                                                                                                               | + an indication for oral anticoagulation* | TRIPLE<br>OAC + Aspi + Clopi                                                                                                                                              | TRIPLE or DUAL<br>OAC + Aspi AND/OR Clopi                              | DUAL<br>OAC + Aspi OR Clopi   | SINGLE<br>OAC                 |                |
| Dual therapy with OAC and clopidogrel should be considered as an alternative to 1-month triple therapy in patients in whom the bleeding risk outweighs the ischemic risk (HAS BLED $\geq 3$ ) |                                           |                                                                                                                                                                           |                                                                        |                               |                               |                |
| with CABG                                                                                                                                                                                     |                                           | DAPT                                                                                                                                                                      | Aspi + Prasu OR Tica OR Clopi                                          |                               |                               | SINGLE<br>Aspi |
|                                                                                                                                                                                               |                                           | DAPT can be extended up to 3 years in high ischaemic-risk patients who have tolerated DAPT without a bleeding complication or shortened to 6 months if high bleeding risk |                                                                        |                               |                               |                |
|                                                                                                                                                                                               | + an indication for oral anticoagulation* | DUAL                                                                                                                                                                      | OAC + Aspi OR Clopi                                                    |                               |                               | SINGLE<br>OAC  |
| <b>STEMI</b>                                                                                                                                                                                  |                                           |                                                                                                                                                                           |                                                                        |                               |                               |                |
| with fibrinolytic therapy                                                                                                                                                                     |                                           | DAPT<br>Aspi + Clopi                                                                                                                                                      | DAPT or SINGLE                                                         | Aspi (+ Clopi)                | SINGLE<br>Aspi                |                |
|                                                                                                                                                                                               | + PCI (DES, BMS or DCB)                   | DAPT                                                                                                                                                                      | Aspi + Clopi                                                           |                               |                               | SINGLE<br>Aspi |
|                                                                                                                                                                                               |                                           | DAPT can be extended up to 3 years in high ischaemic-risk patients who have tolerated DAPT without a bleeding complication or shortened to 6 months if high bleeding risk |                                                                        |                               |                               |                |
| with LV thrombus or high risk of LV thrombus**                                                                                                                                                |                                           | DUAL<br>VKA + Aspi OR Clopi                                                                                                                                               | DAPT                                                                   | Aspi + Prasu OR Tica OR Clopi |                               | SINGLE<br>Aspi |
|                                                                                                                                                                                               | + PCI (DES, BMS or DCB)                   | TRIPLE<br>VKA + Aspi + Clopi                                                                                                                                              | TRIPLE or DUAL APT<br>Aspi + (VKA + Clopi) OR (Prasu OR Tica OR Clopi) | DAPT                          | Aspi + Prasu OR Tica OR Clopi | SINGLE<br>Aspi |

2- Locate the precise clinical situation of your patient (treatment already performed, associated pathologies etc.)

\* Indication for OAC: Mechanical heart valve prosthesis, NV-AF or flutter with CHA2DS2-VASc score  $\geq 2$  for men and  $\geq 3$  for female. Oral anticoagulation therapy to prevent thromboembolism should be considered in male AF patients with a CHA2DS2-VASc score of 1 and in female AF patients with a CHA2DS2-VASc score of 2. For VTE disease, OAC should be continued for 3 months if there is a triggering factor, 3 to 6 months if it is idiopathic, and for long-term if it is recurrent or associated with a pathology at risk. Once the anticoagulant treatment is complete for VTE disease, the patient will be treated as a patient without indication for oral anticoagulation.

\*\* High risk for LV thrombus: Ejection Fraction < 40%, Anteroapical wall motion abnormality.

**2bis- Locate the precise clinical situation of your patient (treatment already performed, associated pathologies etc.)**

| Date of the procedure or acute medical event   | M1                                                                                                                                                                                      | M3                            | M6                  | M12                           | M = months                    |
|------------------------------------------------|-----------------------------------------------------------------------------------------------------------------------------------------------------------------------------------------|-------------------------------|---------------------|-------------------------------|-------------------------------|
| <b>ACUTE/RECENT CORONARY SYNDROMES (ACS)</b>   |                                                                                                                                                                                         |                               |                     |                               |                               |
| <b>NSTE-ACS or STEMI</b>                       |                                                                                                                                                                                         |                               |                     |                               |                               |
| medically managed                              | DAPT                                                                                                                                                                                    | Aspi + Tica OR Clopi          |                     |                               | SINGLE                        |
|                                                | DAPT can be extended up to 3 years in high ischaemic-risk patients who have tolerated DAPT without a bleeding complication or shortened to 6 months if high bleeding risk               |                               |                     |                               | Aspi                          |
| + an indication for oral anticoagulation*      | DUAL                                                                                                                                                                                    | OAC + Aspi OR Clopi           |                     |                               | SINGLE                        |
|                                                |                                                                                                                                                                                         |                               |                     |                               | OAC                           |
| with PCI (DES, BMS, or DCB)                    | DAPT                                                                                                                                                                                    | Aspi + Prasu OR Tica OR Clopi |                     |                               | MONO                          |
|                                                | DAPT can be extended up to 3 years in high ischaemic-risk patients who have tolerated DAPT without a bleeding complication or shortened to 6 months if high bleeding risk               |                               |                     |                               | Aspi                          |
| + an indication for oral anticoagulation*      | TRIPLE                                                                                                                                                                                  | TRIPLE or DUAL                | DUAL                | DUAL                          | SINGLE                        |
|                                                | OAC + Aspi + Clopi                                                                                                                                                                      | OAC + Aspi AND/OR Clopi       | OAC + Aspi OR Clopi | OAC + Aspi OR Clopi           | OAC                           |
|                                                | Dual therapy with OAC and clopidogrel should be considered as an alternative to 1-month triple therapy in patients in whom the bleeding risk outweighs the ischemic risk (HAS BLED ≥ 3) |                               |                     |                               |                               |
| with CABG                                      | DAPT                                                                                                                                                                                    | Aspi + Prasu OR Tica OR Clopi |                     |                               | SINGLE                        |
|                                                | DAPT can be extended up to 3 years in high ischaemic-risk patients who have tolerated DAPT without a bleeding complication or shortened to 6 months if high bleeding risk               |                               |                     |                               | Aspi                          |
| + an indication for oral anticoagulation*      | DUAL                                                                                                                                                                                    | OAC + Aspi OR Clopi           |                     |                               | SINGLE                        |
|                                                |                                                                                                                                                                                         |                               |                     |                               | OAC                           |
| <b>STEMI</b>                                   |                                                                                                                                                                                         |                               |                     |                               |                               |
| with fibrinolytic therapy                      | DAPT                                                                                                                                                                                    | DAPT or SINGLE                | Aspi (+ Clopi)      | SINGLE                        |                               |
|                                                | Aspi + Clopi                                                                                                                                                                            |                               |                     | Aspi                          |                               |
| + PCI (DES, BMS or DCB)                        | DAPT                                                                                                                                                                                    | Aspi + Clopi                  |                     |                               | SINGLE                        |
|                                                | DAPT can be extended up to 3 years in high ischaemic-risk patients who have tolerated DAPT without a bleeding complication or shortened to 6 months if high bleeding risk               |                               |                     |                               | Aspi                          |
| with LV thrombus or high risk of LV thrombus** | DUAL                                                                                                                                                                                    | VKA + Aspi OR Clopi           | DAPT                | Aspi + Prasu OR Tica OR Clopi | SINGLE                        |
|                                                |                                                                                                                                                                                         |                               |                     |                               | Aspi                          |
| + PCI (DES, BMS or DCB)                        | TRIPLE                                                                                                                                                                                  | VKA + Aspi + Clopi            | TRIPLE or DUAL APT  | DAPT                          | SINGLE                        |
|                                                | Aspi + (VKA + Clopi) OR (Prasu OR Tica OR Clopi)                                                                                                                                        |                               |                     |                               | Aspi + Prasu OR Tica OR Clopi |

## ABBREVIATIONS

**CHA2DS2-VASc** C Congestive Heart failure (+1)  
 H Hypertension (+1) A2 Age ≥ 75 (+2)  
 D Diabetes Mellitus (+1) S2 Prior stroke or TIA thromboembolism (+2)  
 V Vascular disease (+1) A Age 65-74 (+1)  
 Sc Sex category (i.e.: female sex) (+1)

**Hypertension and diabetes = 2 points**  
**→ Indication for oral anticoagulation**

**HAS BLED** Abnormal renal / liver function (+1 or +2)  
 Hypertension (+1) Stroke history (+1)  
 Prior major Bleeding or predisposition to bleeding (+1)  
 Labile INR (+1) Elderly > 65 (+1)  
 Drugs (concomitant aspirin, clopidogrel, NSAIDs) or alcohol (+1 or +2)

**Abnormal renal function = 1 point**  
**Drugs = 1 point**  
**HAS BLED = 2**

\* Indication for OAC: Mechanical heart valve prosthesis, NV-AF or flutter with CHA2DS2-VASc score ≥ 2 for men and ≥ 3 for female. Oral anticoagulation therapy to prevent thromboembolism should be considered in male AF patients with a CHA2DS2-VASc score of 1 and in female AF patients with a CHA2DS2-VASc score of 2. For

**3- In the recommended treatment, find out where your patient is currently (here: 5 months)**

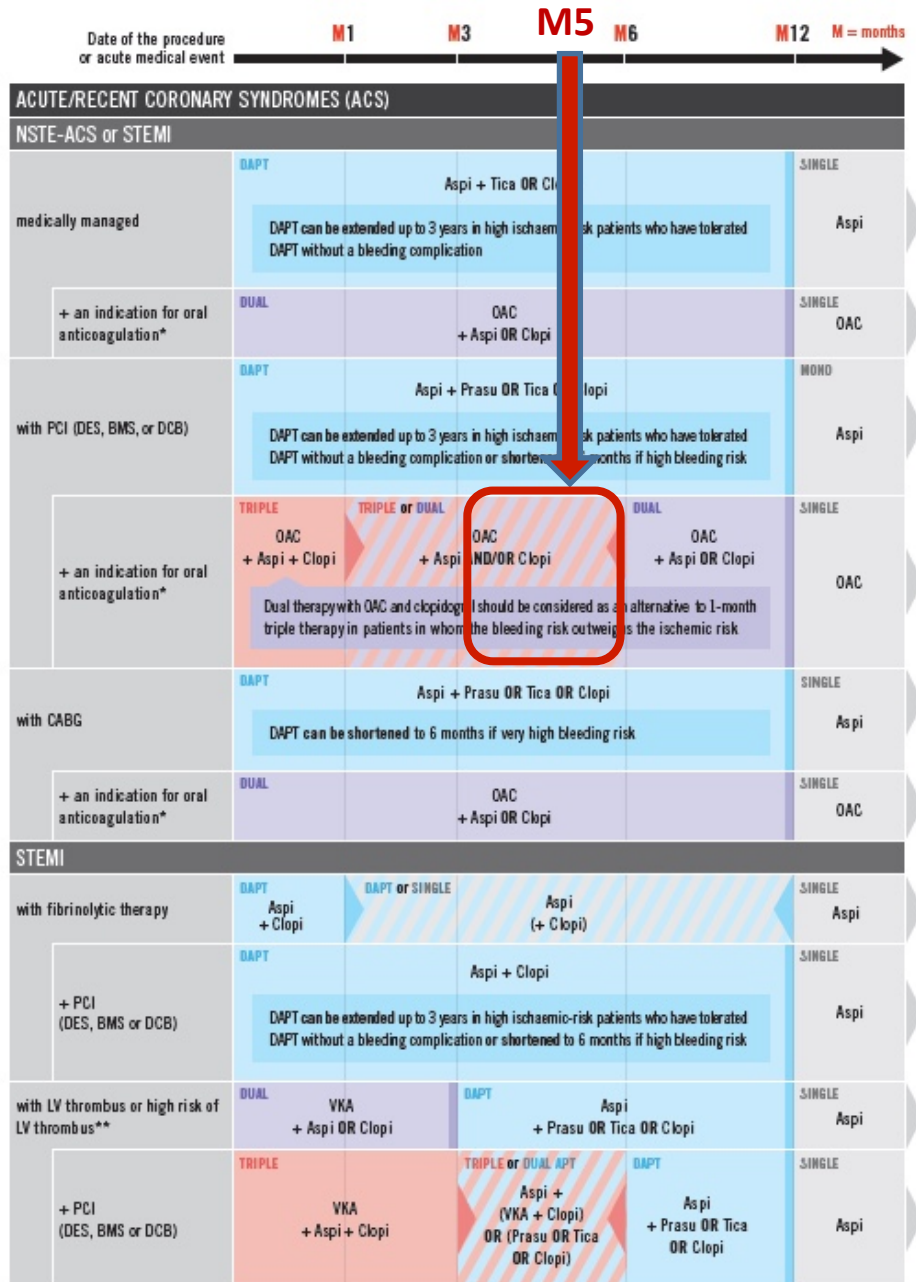

**Here, two options are possible according to the ischemic and bleeding risk of your patient:**

- 1) Dual therapy: OAC + Aspirin OR Clopidogrel up to 12 months (so for another 7 months)
- 2) Triple therapy: OAC + Aspirin + Clopidogrel up to 6 months (so for another 1 month) and then a dual therapy with OAC + Aspirin OR Clopidogrel up to 12 months (so for another 6 months)

a pathology at risk. Once the anticoagulant treatment is complete for VTE disease, the patient will be treated as a patient without indication for oral anticoagulation.

\*\* High risk for LV thrombus: Ejection Fraction < 40%, Anterolateral wall motion abnormality.

## 4- Check the recommended dosage for the drugs you want to prescribe

CLINICAL SITUATIONS NOT FOUND IN THIS TOOL NEED A SPECIALIST'S OPINION

|          |                                                                  |
|----------|------------------------------------------------------------------|
| SINGLE   | Single Therapy:<br>Antiplatelet (SAPT) or Anticoagulation (SACT) |
| DUAL APT | Dual Antiplatelet Therapy (DAPT)                                 |
| DUAL     | Dual Therapy (SAPT + SACT)                                       |
| TRIPLE   | Triple Therapy (DAPT + SACT)                                     |

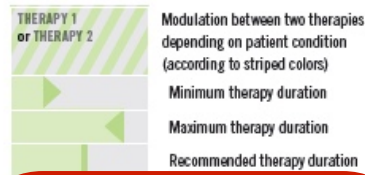

### Abbreviations

|                                      |                                                                                                                       |
|--------------------------------------|-----------------------------------------------------------------------------------------------------------------------|
| <b>ABC<sup>2</sup> score for TIA</b> | Age ≥ 60 years (+1)                                                                                                   |
|                                      | Clinical features of the TIA (unilateral weakness (+2), speech disturbance without weakness (+1), other symptoms (0)) |
|                                      | Duration of symptoms (< 10 min (0), 10-59 min (+1), ≥ 60 min (+2))                                                    |
|                                      | BP ≥ 140/90 mmHg (+1)      Diabetes (+1)                                                                              |
| <b>ACS</b>                           | Acute Coronary Syndrome                                                                                               |
| <b>Aspi</b>                          | Aspirin                                                                                                               |
| <b>BMS</b>                           | Bare-Metal Stent                                                                                                      |
| <b>CABG</b>                          | Coronary Artery By Pass Graft                                                                                         |
| <b>CHA2DS2-VASc</b>                  | C Congestive Heart failure (+1)                                                                                       |
|                                      | H Hypertension (+1)      A2 Age ≥ 75 (+2)                                                                             |
|                                      | D Diabetes Mellitus (+1)      S2 Prior stroke or TIA/thromboembolism (+1)                                             |
|                                      | V Vascular disease (+1)      A Age 65-74 (+1)                                                                         |
|                                      | Sex Sex category (i.e.: female sex) (+1)                                                                              |
| <b>Cilo</b>                          | Cilostazol                                                                                                            |
| <b>Clopi</b>                         | Clopidogrel                                                                                                           |
| <b>CTLI</b>                          | Chronic Limb-Threatening Ischemia                                                                                     |
| <b>DAPT</b>                          | Dual Antiplatelet Therapy                                                                                             |
| <b>DCB</b>                           | Drug-Coated Balloon                                                                                                   |
| <b>DES</b>                           | Drug-Eluting Stent                                                                                                    |
| <b>DOA</b>                           | Direct Oral Anticoagulant                                                                                             |
| <b>DUAL</b>                          | Dual Therapy: SAPT + SACT                                                                                             |
| <b>HAS BLED</b>                      | Abnormal renal / liver function (+1 or +2)                                                                            |
|                                      | Hypertension (+1)      Stroke history (+1)                                                                            |
|                                      | Prior major Bleeding or predisposition to bleeding (+1)                                                               |
|                                      | Labile INR (+1)      Elderly > 65 (+1)                                                                                |
|                                      | Drugs (concomitant aspirin, clopidogrel, NSAIDs) or alcohol (+1 or +2)                                                |
| <b>INR</b>                           | International Normalized Ratio                                                                                        |
| <b>LEAD</b>                          | Lower Extremity Artery Disease                                                                                        |
| <b>LV</b>                            | Left Ventricular                                                                                                      |
| <b>NIBSS</b>                         | National Institutes of Health Stroke Scale                                                                            |
| <b>NSTE-ACS</b>                      | Non-ST Elevation Acute Coronary Syndrome                                                                              |
| <b>NV-AF</b>                         | Non-valvular atrial fibrillation                                                                                      |
| <b>OAC</b>                           | Oral Anticoagulant: VKA or DOA                                                                                        |
| <b>PCI</b>                           | Percutaneous coronary intervention (= DES, BMS or DCB)                                                                |
| <b>Prasug</b>                        | Prasugrel                                                                                                             |
| <b>SAPT</b>                          | Single Antiplatelet Therapy                                                                                           |
| <b>SACT</b>                          | Single Anticoagulation Therapy                                                                                        |
| <b>SCAD</b>                          | Stable coronary artery disease                                                                                        |
| <b>STEMI</b>                         | ST-Elevation Myocardial Infarction                                                                                    |
| <b>TAVR</b>                          | Transcatheter Aortic Valve Replacement                                                                                |
| <b>TIA</b>                           | Transient Ischemic Attack                                                                                             |
| <b>Tica</b>                          | Ticagrelor                                                                                                            |
| <b>Triflu</b>                        | Triflusal                                                                                                             |
| <b>TRIPLE</b>                        | Triple Therapy: DAPT + SACT                                                                                           |
| <b>VKA</b>                           | Vitamin K Antagonist Transcatheter Aortic Valve                                                                       |
| <b>VTE</b>                           | Venous Thromboembolism                                                                                                |

### Dosage of antithrombotic drugs

Aspirin: 75-100 mg/day  
 Aspirin/dipyridamole: 25/200 mg twice a day  
 Cilostazol: 100 mg twice a day  
 Clopidogrel: 75 mg/day  
 Prasugrel: 10 mg/day (5 mg/day in patients with body weight < 60 kg)  
 Contraindications for prasugrel: previous intracranial haemorrhage, previous ischaemic stroke or transient ischaemic attack, or ongoing bleeds; prasugrel is not recommended for patients >75 years of age or with a body weight <60 kg.  
 Ticagrelor: 90 mg twice a day  
 Contraindications for ticagrelor: previous intracranial haemorrhage or ongoing bleeds.  
 Triflusal: 600 mg/day  
 VKA: target INR 2-3 for NV-AF, VTE, LV thrombus  
 Rivaroxaban (Xarelto):  
 • Venous thrombo-embolism (venous thrombosis/pulmonary embolism): D1 to D21: 15 mg x 2/day then from D22 onwards: 20 mg/day in a single take  
 • For the prevention of embolic stroke in patients with NV-AF: 20 mg/day in a single take  
 • No adjustment on weight, age, sex  
 • Renal failure  
 - Contraindication with creatinine clearance < 15 ml/min  
 - With creatinine clearance between 15-49 ml/min:  
 § NV-AF: 15 mg/day  
 § Venous thrombo-embolism: 15 mg x 2/day during the first three weeks then 20 mg/day in a single take  
 - No adjustment beyond a creatinine clearance > 50 ml/min  
 Apixaban (Eliquis):  
 • For the prevention of embolic stroke in patients with NV-AF:  
 - 5 mg x 2/day  
 - NV-AF and at least two of the following: age ≥ 80 yo, weight ≤ 60 kg, serum creatinine ≥ 133 micromol/L; 2.5 mg x 2/day  
 - With creatinine clearance between 15-29 ml/min: 2.5 mg x 2/day  
 - Contraindication with creatinine clearance < 15 ml/min  
 • Venous thrombo-embolism (venous thrombosis/pulmonary embolism): D1 to D7: 10 mg x 2/day then from D8 onwards: 5 mg x 2/day  
 Dabigatran (Pradaxa):  
 • For the prevention of embolic stroke in patients with NV-AF or VTE treatment, after treatment with a parenteral anticoagulant for at least 5 days: 150 mg x 2/day  
 • 110 mg x 2/day if:  
 § > 80 yo  
 § Patients also treated with Verapamil  
 § clearance between 30-50 ml/min  
 Contraindication with creatinine clearance < 30 ml/min

### THE COCKCROFT AND GAULT FORMULA (1973)

$$C_{Cr} = \left( \frac{(140 - \text{Age}) \times \text{Weight}}{72 \times S_{Cr}} \right) \times 0.85 \text{ (if female)}$$

$C_{Cr}$  (creatinine clearance) = mL/minute  
 Age = years      Weight = kg       $S_{Cr}$  (serum creatinine) = mg/dL

IF BLEEDING DURING DAPT, follow these recommendations (figure 10):  
<https://www.escardio.org/Guidelines/Clinical-Practice-Guidelines/2017-focused-update-on-dual-antiplatelet-therapy-dapt>

SPECIFIC CONDITIONS REQUIRING SYSTEMATICALLY AN IN-HOSPITAL SPECIALIST HAVE BEEN EXCLUDED: cancer, auto-immune disease, hemophilia, human immunodeficiency virus (HIV), pediatrics and pregnancy and In-hospital prescriptions (including bridging therapy, perioperative therapy, and treatment of acute phase of cardiovascular event)

### OAC:

- VKA with a target INR: 2-3
- Rivaroxaban 15 mg/day
- Apixaban 5 mg X 2/day
- Dabigatran is contraindicated

### Antiplatelets:

- Aspirin 75-100 mg/day
- Clopidogrel 75 mg/day

| TARGET INR FOR MECHANICAL PROSTHESES |      | Patient-related risk factor <sup>a</sup> |  |
|--------------------------------------|------|------------------------------------------|--|
| Prosthesis thrombogenicity           | None | ≥1                                       |  |
| Low <sup>b</sup>                     | 2.5  | 3.0                                      |  |
| Medium <sup>c</sup>                  | 3.0  | 3.5                                      |  |
| High <sup>d</sup>                    | 3.5  | 4.0                                      |  |

INR = international normalized ratio; LVEF = left ventricular ejection fraction  
<sup>a</sup> Mitral or tricuspid valve replacement, previous thromboembolism; atrial fibrillation, mitral stenosis of any degree, LVEF < 35%  
<sup>b</sup> Carbomedics, Medtronic Hall, ATS, Medtronic Open-Pivot, St-Jude Medical, On-X, Sorin Bicarbon  
<sup>c</sup> Other bileaflet valve with insufficient data  
<sup>d</sup> Lillehei-Kaster, Omniscience, Starr-Edwards (ball-cage), Bjork Shiley and other tilting-disc valves
